# Supplementary material for: Artificial neural networks for predicting social comparison effects among female Instagram users
Source: PLoS One. 2020 Feb 25;15(2):e0229354. doi: 10.1371/journal.pone.0229354 (PMC7041802; doi:10.1371/journal.pone.0229354)
Supplement: S2 Dataset — (XLSX) [file pone.0229354.s006.xlsx]

## Sheet: Liczba odpowiedzi 1
Timestamp	1. If I could only visit one place on the Internet, it would be Instagram.	2. I feel bad if I don't check my Instagram profile at least once a day.	3. I often look for Internet access to look at Instagram.	4. I usually go to Instagram at bedtime.	5. Viewing Instagram is a good way to get bored.	6. When I'm bored, I use Instagram sometimes.	7. When I get bored, I always use Instagram.	8. I spend time on Instagram at the expense of my other duties.	9. I spend more time on Instagram than I would like.	10. Sometimes, I use Instagram instead of sleeping.	11. My Instagram profile is polished.	12. I like to improve my Instagram profile.	13. It's important for me to regularly post new Instagram posts.	14. When I compare my Instagram profile to people who have better profiles, I feel that it's possible that one day I will also reach their level of popularity.	15. When I compare my Instagram profile to people who have better profiles, I hope my profile will improve.	16. When I compare my Instagram profile to people who have better profiles, I am happy that my profile can also be so good.	17. When I compare my Instagram profile to people who have better profiles, I feel frustrated with the level of my own profile.	18. When I compare my Instagram profile to people who have better profiles, I feel anxious that my profile is not achieving such results.	19. When I compare my Instagram profile to people who have better profiles, I get depressed realizing that my profile is not so good.	20. When I compare my Instagram profile to people who have weaker profiles, I'm afraid my profile will get worse.	21. When I compare my Instagram profile to people who have weaker profiles, I am afraid that the future of my profile will be the same.	22. When I compare my Instagram profile to people who have weaker profiles, I'm afraid my profile's popularity will drop.	23. When I compare my Instagram profile to people who have weaker profiles, I feel how good I am doing.	24. When I compare my Instagram profile to people who have weaker profiles, I feel relief about my own profile.	25. When I compare my Instagram profile to people with weaker profiles, I am happy to be doing so well.	26. In general, I am satisfied with myself.	27. Sometimes I think I'm useless.	28. I think I have some good qualities.	29. I can do things as well as others.	30. I feel I don't have much reason to be proud.	31. Sometimes I feel useless.	32. I think I am a valuable person, at least as much as the rest.	33. I would like to have more respect for myself.	34. All in all, I feel I'm a failure.	35. I have a positive attitude towards myself.	36. I feel tense or nervous.	37. I can still enjoy the things I used to enjoy.	38. I have a feeling that something bad is going to happen.	39. I can laugh and see the funny sides of every situation.	40. I worry.	41. I feel joyful.	42. I can sit back and feel relaxed.	43. I feel that I am operating at a slow speed.	44. I feel fear, "butterflies in my stomach."	45. I stopped taking care of my appearance.	46. ​​I feel restless when I have to do something.	47. I look forward to the future.	48. I experience panic attacks.	49. I can enjoy a good book, radio play or film.
2018-10-18 13:24:53	Agree	Neither agree or disagree	Neither agree or disagree	Rather disagree	Rather disagree	Rather agree	Rather disagree	Disagree	Rather disagree	Strongly disagree	Rather agree	Rather agree	Rather agree	Rather disagree	Disagree	Disagree	Rather disagree	Rather disagree	Strongly disagree	Strongly disagree	Strongly disagree	Strongly disagree	Rather agree	Rather agree	Rather disagree	Rather disagree	Rather agree	Rather agree	Rather agree	Rather agree	Agree	Neither agree or disagree	Strongly disagree	Disagree	Rather agree	Agree	Rather agree	Neither agree or disagree	Rather agree	Strongly agree	Rather disagree	Disagree	Rather agree	Strongly agree	Rather disagree	Agree	Rather disagree	Agree	Rather agree
2018-10-18 13:37:50	Neither agree or disagree	Strongly agree	Neither agree or disagree	Strongly agree	Strongly agree	Agree	Neither agree or disagree	Rather disagree	Neither agree or disagree	Strongly disagree	Neither agree or disagree	Neither agree or disagree	Disagree	Strongly disagree	Rather agree	Neither agree or disagree	Rather agree	Disagree	Rather agree	Rather disagree	Disagree	Disagree	Neither agree or disagree	Agree	Neither agree or disagree	Strongly agree	Strongly disagree	Strongly agree	Strongly agree	Neither agree or disagree	Strongly disagree	Strongly agree	Strongly disagree	Strongly disagree	Strongly agree	Disagree	Strongly agree	Neither agree or disagree	Strongly agree	Rather disagree	Strongly agree	Strongly agree	Disagree	Rather disagree	Strongly disagree	Disagree	Strongly agree	Strongly disagree	Strongly agree
2018-10-18 13:40:24	Rather disagree	Neither agree or disagree	Neither agree or disagree	Rather disagree	Disagree	Agree	Disagree	Rather agree	Neither agree or disagree	Rather agree	Rather agree	Disagree	Neither agree or disagree	Strongly agree	Strongly disagree	Neither agree or disagree	Agree	Neither agree or disagree	Rather disagree	Neither agree or disagree	Disagree	Strongly disagree	Rather disagree	Disagree	Rather agree	Strongly agree	Strongly disagree	Agree	Rather disagree	Neither agree or disagree	Rather disagree	Strongly agree	Strongly disagree	Strongly disagree	Rather agree	Rather disagree	Agree	Neither agree or disagree	Agree	Disagree	Strongly agree	Rather agree	Agree	Disagree	Agree	Neither agree or disagree	Strongly agree	Disagree	Rather agree
2018-10-18 13:40:45	Disagree	Strongly agree	Rather disagree	Rather agree	Rather agree	Strongly agree	Rather agree	Strongly agree	Strongly agree	Rather disagree	Rather disagree	Rather agree	Neither agree or disagree	Neither agree or disagree	Neither agree or disagree	Neither agree or disagree	Strongly disagree	Strongly disagree	Strongly disagree	Strongly disagree	Strongly disagree	Strongly disagree	Neither agree or disagree	Neither agree or disagree	Neither agree or disagree	Rather agree	Rather agree	Strongly agree	Strongly agree	Agree	Rather agree	Agree	Strongly agree	Strongly disagree	Rather disagree	Agree	Strongly agree	Rather agree	Rather disagree	Rather agree	Rather agree	Rather disagree	Agree	Agree	Disagree	Strongly agree	Rather agree	Strongly agree	Strongly agree
2018-10-18 13:48:40	Strongly agree	Strongly agree	Strongly agree	Strongly agree	Strongly agree	Strongly agree	Agree	Neither agree or disagree	Rather agree	Rather disagree	Neither agree or disagree	Neither agree or disagree	Neither agree or disagree	Rather disagree	Rather disagree	Neither agree or disagree	Rather disagree	Rather disagree	Rather disagree	Disagree	Disagree	Rather disagree	Neither agree or disagree	Neither agree or disagree	Neither agree or disagree	Rather agree	Rather agree	Agree	Rather agree	Rather disagree	Rather disagree	Rather agree	Neither agree or disagree	Strongly disagree	Rather agree	Rather disagree	Rather agree	Rather disagree	Agree	Rather disagree	Agree	Strongly agree	Rather agree	Rather disagree	Rather disagree	Rather disagree	Agree	Rather disagree	Neither agree or disagree
2018-10-18 13:52:19	Strongly disagree	Strongly disagree	Rather disagree	Strongly agree	Agree	Agree	Rather disagree	Disagree	Rather disagree	Strongly agree	Rather disagree	Disagree	Strongly disagree	Strongly disagree	Strongly disagree	Strongly disagree	Strongly disagree	Strongly disagree	Strongly disagree	Strongly disagree	Strongly disagree	Strongly disagree	Strongly disagree	Strongly disagree	Strongly disagree	Agree	Disagree	Strongly agree	Strongly agree	Strongly disagree	Strongly disagree	Strongly agree	Strongly disagree	Strongly disagree	Agree	Rather disagree	Strongly agree	Strongly disagree	Agree	Rather disagree	Strongly agree	Strongly agree	Strongly disagree	Strongly disagree	Strongly disagree	Strongly disagree	Agree	Strongly disagree	Strongly agree
2018-10-18 13:53:30	Strongly disagree	Strongly disagree	Strongly disagree	Strongly disagree	Strongly disagree	Strongly disagree	Strongly disagree	Strongly disagree	Strongly disagree	Strongly disagree	Disagree	Disagree	Disagree	Rather disagree	Neither agree or disagree	Disagree	Neither agree or disagree	Neither agree or disagree	Strongly disagree	Strongly disagree	Strongly disagree	Disagree	Neither agree or disagree	Neither agree or disagree	Neither agree or disagree	Rather agree	Rather disagree	Agree	Strongly agree	Disagree	Rather disagree	Agree	Agree	Disagree	Rather agree	Neither agree or disagree	Agree	Rather disagree	Rather agree	Rather disagree	Rather agree	Rather agree	Agree	Neither agree or disagree	Neither agree or disagree	Rather disagree	Agree	Neither agree or disagree	Rather agree
2018-10-18 13:56:51	Neither agree or disagree	Strongly disagree	Strongly disagree	Strongly disagree	Neither agree or disagree	Rather agree	Neither agree or disagree	Strongly disagree	Strongly disagree	Strongly disagree	Disagree	Disagree	Disagree	Strongly disagree	Strongly disagree	Strongly disagree	Strongly disagree	Strongly disagree	Strongly disagree	Strongly disagree	Strongly disagree	Strongly disagree	Strongly disagree	Strongly disagree	Strongly disagree	Agree	Strongly disagree	Strongly agree	Strongly agree	Strongly disagree	Strongly disagree	Strongly agree	Strongly disagree	Strongly disagree	Strongly agree	Strongly disagree	Strongly agree	Strongly disagree	Strongly agree	Rather disagree	Strongly agree	Agree	Strongly disagree	Strongly disagree	Strongly disagree	Strongly disagree	Strongly agree	Strongly disagree	Strongly agree
2018-10-18 13:59:13	Strongly disagree	Neither agree or disagree	Disagree	Rather disagree	Rather agree	Rather agree	Neither agree or disagree	Disagree	Neither agree or disagree	Strongly disagree	Agree	Agree	Rather disagree	Neither agree or disagree	Neither agree or disagree	Neither agree or disagree	Rather disagree	Rather disagree	Rather agree	Rather agree	Neither agree or disagree	Agree	Rather disagree	Neither agree or disagree	Rather agree	Strongly agree	Strongly disagree	Strongly agree	Strongly agree	Rather disagree	Agree	Neither agree or disagree	Rather disagree	Strongly disagree	Strongly agree	Neither agree or disagree	Agree	Disagree	Strongly agree	Rather disagree	Strongly agree	Strongly agree	Rather disagree	Rather disagree	Rather disagree	Rather disagree	Rather agree	Rather disagree	Agree
2018-10-18 14:00:11	Rather agree	Disagree	Neither agree or disagree	Agree	Strongly agree	Strongly agree	Strongly agree	Rather agree	Rather agree	Agree	Disagree	Neither agree or disagree	Rather disagree	Rather disagree	Rather disagree	Rather disagree	Neither agree or disagree	Neither agree or disagree	Neither agree or disagree	Neither agree or disagree	Neither agree or disagree	Neither agree or disagree	Neither agree or disagree	Neither agree or disagree	Neither agree or disagree	Rather agree	Rather disagree	Rather agree	Rather agree	Rather disagree	Rather disagree	Rather agree	Agree	Disagree	Rather agree	Neither agree or disagree	Rather agree	Rather agree	Strongly agree	Strongly agree	Agree	Rather agree	Rather agree	Agree	Rather disagree	Rather disagree	Agree	Rather agree	Strongly agree
2018-10-18 14:07:31	Strongly disagree	Neither agree or disagree	Strongly disagree	Rather agree	Rather agree	Rather agree	Rather agree	Rather agree	Agree	Strongly agree	Disagree	Disagree	Strongly disagree	Strongly disagree	Strongly disagree	Strongly disagree	Strongly disagree	Strongly disagree	Strongly disagree	Strongly disagree	Strongly disagree	Strongly disagree	Strongly disagree	Strongly disagree	Strongly disagree	Rather agree	Rather disagree	Strongly agree	Strongly agree	Rather disagree	Rather disagree	Strongly agree	Strongly disagree	Strongly disagree	Strongly agree	Neither agree or disagree	Strongly agree	Disagree	Strongly agree	Rather agree	Strongly agree	Rather agree	Agree	Rather disagree	Rather disagree	Neither agree or disagree	Agree	Rather disagree	Strongly agree
2018-10-18 14:07:44	Agree	Agree	Rather agree	Strongly agree	Strongly agree	Strongly agree	Agree	Rather disagree	Rather disagree	Strongly disagree	Neither agree or disagree	Agree	Disagree	Neither agree or disagree	Rather agree	Rather agree	Disagree	Disagree	Strongly disagree	Strongly disagree	Strongly disagree	Strongly disagree	Neither agree or disagree	Neither agree or disagree	Neither agree or disagree	Strongly agree	Strongly disagree	Strongly agree	Strongly agree	Disagree	Strongly disagree	Strongly agree	Strongly disagree	Strongly disagree	Strongly agree	Strongly disagree	Strongly agree	Strongly disagree	Strongly agree	Strongly disagree	Strongly agree	Neither agree or disagree	Strongly disagree	Strongly disagree	Strongly disagree	Rather disagree	Strongly agree	Rather disagree	Strongly agree
2018-10-18 14:08:54	Disagree	Disagree	Disagree	Disagree	Rather agree	Neither agree or disagree	Disagree	Disagree	Disagree	Disagree	Neither agree or disagree	Disagree	Disagree	Disagree	Disagree	Neither agree or disagree	Neither agree or disagree	Disagree	Neither agree or disagree	Neither agree or disagree	Rather disagree	Disagree	Neither agree or disagree	Neither agree or disagree	Neither agree or disagree	Strongly agree	Rather disagree	Strongly agree	Strongly agree	Neither agree or disagree	Strongly disagree	Strongly agree	Neither agree or disagree	Strongly disagree	Strongly agree	Neither agree or disagree	Strongly agree	Rather agree	Strongly agree	Rather agree	Strongly agree	Strongly agree	Neither agree or disagree	Neither agree or disagree	Strongly disagree	Neither agree or disagree	Agree	Rather disagree	Strongly agree
2018-10-18 14:13:13	Neither agree or disagree	Strongly disagree	Strongly disagree	Neither agree or disagree	Neither agree or disagree	Rather agree	Rather disagree	Strongly disagree	Strongly disagree	Strongly disagree	Neither agree or disagree	Neither agree or disagree	Disagree	Disagree	Disagree	Neither agree or disagree	Strongly disagree	Neither agree or disagree	Strongly disagree	Strongly disagree	Strongly disagree	Strongly disagree	Neither agree or disagree	Neither agree or disagree	Neither agree or disagree	Rather agree	Strongly disagree	Rather agree	Agree	Strongly disagree	Strongly disagree	Agree	Rather disagree	Strongly disagree	Strongly agree	Rather disagree	Agree	Strongly disagree	Agree	Rather agree	Strongly agree	Agree	Rather agree	Rather disagree	Strongly disagree	Disagree	Agree	Strongly disagree	Agree
2018-10-18 14:16:53	Rather agree	Rather agree	Neither agree or disagree	Agree	Strongly agree	Strongly agree	Rather agree	Neither agree or disagree	Rather agree	Rather disagree	Neither agree or disagree	Rather agree	Disagree	Disagree	Strongly disagree	Neither agree or disagree	Strongly disagree	Strongly disagree	Strongly disagree	Strongly disagree	Strongly disagree	Strongly disagree	Strongly disagree	Strongly disagree	Strongly disagree	Agree	Rather disagree	Strongly agree	Strongly agree	Strongly disagree	Strongly disagree	Strongly agree	Rather agree	Strongly disagree	Agree	Neither agree or disagree	Strongly agree	Rather agree	Agree	Agree	Agree	Neither agree or disagree	Disagree	Rather disagree	Strongly disagree	Rather disagree	Agree	Rather agree	Strongly agree
2018-10-18 14:17:26	Strongly disagree	Rather disagree	Strongly disagree	Rather disagree	Rather agree	Rather agree	Strongly disagree	Strongly disagree	Strongly disagree	Strongly disagree	Neither agree or disagree	Neither agree or disagree	Neither agree or disagree	Disagree	Strongly disagree	Strongly disagree	Strongly disagree	Strongly disagree	Strongly disagree	Strongly disagree	Strongly disagree	Strongly disagree	Strongly disagree	Strongly disagree	Strongly disagree	Rather agree	Neither agree or disagree	Rather agree	Neither agree or disagree	Rather disagree	Neither agree or disagree	Rather agree	Rather disagree	Disagree	Neither agree or disagree	Rather disagree	Strongly agree	Rather disagree	Rather agree	Neither agree or disagree	Rather agree	Rather agree	Rather disagree	Neither agree or disagree	Strongly disagree	Neither agree or disagree	Rather agree	Rather agree	Strongly agree
2018-10-18 14:19:11	Rather disagree	Strongly disagree	Strongly disagree	Neither agree or disagree	Rather disagree	Rather agree	Strongly disagree	Rather disagree	Rather disagree	Strongly disagree	Strongly disagree	Strongly disagree	Strongly disagree	Strongly disagree	Strongly disagree	Strongly disagree	Strongly disagree	Strongly disagree	Strongly disagree	Strongly disagree	Strongly disagree	Strongly disagree	Strongly disagree	Strongly disagree	Strongly disagree	Rather disagree	Rather agree	Strongly agree	Strongly agree	Rather disagree	Rather agree	Agree	Strongly disagree	Rather disagree	Rather disagree	Strongly disagree	Agree	Strongly disagree	Strongly agree	Strongly disagree	Agree	Strongly agree	Agree	Agree	Rather disagree	Rather agree	Agree	Strongly disagree	Strongly agree
2018-10-18 14:23:39	Strongly disagree	Neither agree or disagree	Disagree	Rather agree	Neither agree or disagree	Rather agree	Rather disagree	Neither agree or disagree	Rather disagree	Strongly disagree	Strongly disagree	Neither agree or disagree	Disagree	Strongly disagree	Strongly disagree	Disagree	Disagree	Disagree	Strongly disagree	Disagree	Disagree	Disagree	Disagree	Disagree	Disagree	Rather agree	Rather agree	Strongly agree	Neither agree or disagree	Rather disagree	Rather agree	Rather agree	Agree	Disagree	Rather agree	Rather agree	Rather disagree	Rather disagree	Neither agree or disagree	Agree	Rather agree	Rather agree	Rather agree	Rather agree	Rather disagree	Rather agree	Rather agree	Rather disagree	Rather agree
2018-10-18 14:30:02	Strongly disagree	Neither agree or disagree	Agree	Agree	Strongly agree	Strongly agree	Rather disagree	Strongly agree	Agree	Strongly agree	Rather agree	Rather agree	Rather agree	Rather disagree	Rather agree	Neither agree or disagree	Disagree	Disagree	Neither agree or disagree	Disagree	Rather disagree	Disagree	Rather agree	Rather disagree	Neither agree or disagree	Agree	Rather disagree	Rather agree	Agree	Rather disagree	Strongly disagree	Agree	Rather agree	Strongly disagree	Agree	Neither agree or disagree	Agree	Neither agree or disagree	Rather agree	Rather disagree	Agree	Agree	Agree	Rather agree	Strongly disagree	Neither agree or disagree	Strongly agree	Rather agree	Strongly agree
2018-10-18 14:34:35	Rather agree	Neither agree or disagree	Neither agree or disagree	Rather agree	Rather agree	Agree	Rather disagree	Disagree	Strongly disagree	Strongly disagree	Disagree	Neither agree or disagree	Rather agree	Neither agree or disagree	Neither agree or disagree	Neither agree or disagree	Disagree	Strongly disagree	Strongly disagree	Rather disagree	Strongly disagree	Strongly disagree	Rather disagree	Disagree	Rather disagree	Agree	Rather agree	Strongly agree	Strongly agree	Rather disagree	Rather disagree	Agree	Rather disagree	Strongly disagree	Strongly agree	Agree	Strongly agree	Rather agree	Rather agree	Rather agree	Rather agree	Rather agree	Rather disagree	Rather disagree	Strongly disagree	Neither agree or disagree	Rather agree	Strongly agree	Strongly agree
2018-10-18 14:43:45	Rather agree	Neither agree or disagree	Rather disagree	Neither agree or disagree	Agree	Rather agree	Disagree	Strongly disagree	Rather disagree	Strongly disagree	Rather disagree	Rather agree	Disagree	Strongly disagree	Disagree	Disagree	Strongly disagree	Strongly disagree	Strongly disagree	Strongly disagree	Strongly disagree	Strongly disagree	Strongly disagree	Strongly disagree	Strongly disagree	Rather agree	Neither agree or disagree	Agree	Rather agree	Rather disagree	Neither agree or disagree	Agree	Neither agree or disagree	Strongly disagree	Rather agree	Rather disagree	Agree	Disagree	Strongly agree	Rather disagree	Rather agree	Agree	Rather agree	Disagree	Rather disagree	Rather disagree	Agree	Neither agree or disagree	Agree
2018-10-18 14:47:59	Strongly disagree	Disagree	Strongly disagree	Strongly disagree	Neither agree or disagree	Neither agree or disagree	Disagree	Disagree	Rather disagree	Strongly disagree	Neither agree or disagree	Neither agree or disagree	Strongly disagree	Strongly disagree	Neither agree or disagree	Neither agree or disagree	Neither agree or disagree	Neither agree or disagree	Neither agree or disagree	Neither agree or disagree	Neither agree or disagree	Neither agree or disagree	Neither agree or disagree	Neither agree or disagree	Neither agree or disagree	Rather agree	Rather disagree	Strongly agree	Strongly agree	Strongly disagree	Disagree	Agree	Strongly disagree	Strongly disagree	Agree	Rather agree	Strongly agree	Rather disagree	Agree	Rather agree	Agree	Agree	Rather disagree	Strongly disagree	Rather disagree	Disagree	Strongly agree	Strongly disagree	Agree
2018-10-18 14:51:32	Disagree	Rather agree	Rather agree	Rather disagree	Rather agree	Rather agree	Rather disagree	Disagree	Disagree	Strongly disagree	Neither agree or disagree	Neither agree or disagree	Strongly disagree	Strongly disagree	Strongly disagree	Neither agree or disagree	Strongly disagree	Neither agree or disagree	Neither agree or disagree	Neither agree or disagree	Neither agree or disagree	Neither agree or disagree	Neither agree or disagree	Neither agree or disagree	Neither agree or disagree	Rather agree	Rather disagree	Rather agree	Rather agree	Rather disagree	Rather agree	Rather agree	Rather disagree	Rather disagree	Rather agree	Rather agree	Agree	Rather disagree	Strongly agree	Rather disagree	Neither agree or disagree	Neither agree or disagree	Neither agree or disagree	Neither agree or disagree	Neither agree or disagree	Neither agree or disagree	Rather agree	Neither agree or disagree	Rather agree
2018-10-18 14:54:26	Strongly disagree	Strongly agree	Strongly agree	Strongly agree	Strongly agree	Strongly agree	Strongly agree	Strongly agree	Strongly disagree	Strongly agree	Rather agree	Strongly agree	Strongly agree	Strongly agree	Strongly agree	Strongly agree	Strongly disagree	Rather disagree	Agree	Rather agree	Rather disagree	Strongly disagree	Strongly agree	Strongly agree	Strongly agree	Strongly agree	Rather disagree	Strongly agree	Strongly agree	Strongly disagree	Strongly disagree	Strongly agree	Rather agree	Strongly disagree	Agree	Strongly disagree	Strongly agree	Strongly disagree	Strongly agree	Disagree	Strongly agree	Strongly agree	Strongly agree	Strongly disagree	Disagree	Strongly disagree	Agree	Strongly disagree	Agree
2018-10-18 14:58:13	Neither agree or disagree	Rather agree	Rather disagree	Rather agree	Rather agree	Rather agree	Rather agree	Rather disagree	Disagree	Rather agree	Neither agree or disagree	Neither agree or disagree	Rather disagree	Disagree	Rather disagree	Neither agree or disagree	Disagree	Disagree	Disagree	Disagree	Disagree	Rather disagree	Disagree	Disagree	Disagree	Agree	Disagree	Rather agree	Rather agree	Disagree	Disagree	Rather agree	Neither agree or disagree	Disagree	Rather agree	Strongly disagree	Rather agree	Disagree	Rather agree	Rather disagree	Agree	Agree	Rather disagree	Agree	Rather disagree	Rather disagree	Agree	Rather agree	Agree
2018-10-18 16:26:56	Rather disagree	Neither agree or disagree	Rather disagree	Agree	Rather agree	Rather agree	Strongly disagree	Rather disagree	Rather agree	Rather disagree	Strongly disagree	Disagree	Strongly disagree	Strongly disagree	Strongly disagree	Strongly disagree	Strongly disagree	Strongly disagree	Strongly disagree	Strongly disagree	Strongly disagree	Strongly disagree	Strongly disagree	Strongly disagree	Strongly disagree	Neither agree or disagree	Rather agree	Rather agree	Rather agree	Rather agree	Rather agree	Rather agree	Agree	Rather agree	Rather disagree	Agree	Rather agree	Rather agree	Rather disagree	Strongly agree	Rather agree	Rather disagree	Agree	Agree	Rather disagree	Neither agree or disagree	Rather disagree	Agree	Agree
2018-10-18 17:07:16	Agree	Neither agree or disagree	Rather disagree	Disagree	Neither agree or disagree	Agree	Rather disagree	Disagree	Rather agree	Disagree	Rather agree	Rather agree	Rather disagree	Disagree	Neither agree or disagree	Neither agree or disagree	Neither agree or disagree	Neither agree or disagree	Strongly disagree	Neither agree or disagree	Neither agree or disagree	Neither agree or disagree	Neither agree or disagree	Neither agree or disagree	Neither agree or disagree	Agree	Disagree	Agree	Agree	Disagree	Disagree	Agree	Disagree	Disagree	Agree	Disagree	Agree	Disagree	Agree	Disagree	Rather agree	Agree	Rather disagree	Disagree	Disagree	Disagree	Agree	Rather disagree	Strongly agree
2018-10-18 17:16:06	Rather agree	Strongly agree	Rather agree	Strongly agree	Agree	Strongly agree	Agree	Rather disagree	Rather agree	Strongly agree	Rather disagree	Rather agree	Neither agree or disagree	Rather disagree	Rather agree	Rather agree	Agree	Rather disagree	Strongly disagree	Rather disagree	Rather agree	Rather agree	Neither agree or disagree	Rather agree	Rather agree	Rather agree	Agree	Rather agree	Rather agree	Rather agree	Rather agree	Rather agree	Rather agree	Neither agree or disagree	Rather agree	Agree	Rather agree	Rather agree	Rather agree	Rather agree	Rather agree	Rather agree	Neither agree or disagree	Rather agree	Agree	Rather agree	Rather disagree	Rather agree	Strongly agree
2018-10-18 17:36:07	Strongly disagree	Strongly disagree	Strongly disagree	Rather agree	Rather agree	Agree	Rather agree	Strongly disagree	Strongly disagree	Rather agree	Neither agree or disagree	Neither agree or disagree	Strongly disagree	Neither agree or disagree	Neither agree or disagree	Neither agree or disagree	Neither agree or disagree	Neither agree or disagree	Neither agree or disagree	Neither agree or disagree	Rather agree	Neither agree or disagree	Neither agree or disagree	Neither agree or disagree	Neither agree or disagree	Agree	Rather disagree	Agree	Strongly agree	Rather agree	Agree	Rather agree	Agree	Disagree	Rather agree	Strongly agree	Strongly agree	Strongly agree	Strongly agree	Agree	Agree	Rather disagree	Rather disagree	Strongly agree	Rather disagree	Neither agree or disagree	Rather agree	Strongly agree	Strongly agree
2018-10-18 18:20:13	Rather disagree	Rather disagree	Rather disagree	Rather disagree	Rather disagree	Rather disagree	Rather disagree	Rather disagree	Rather disagree	Rather disagree	Rather disagree	Rather disagree	Rather disagree	Rather disagree	Rather disagree	Rather disagree	Rather disagree	Rather disagree	Rather disagree	Rather disagree	Rather disagree	Rather disagree	Rather disagree	Rather disagree	Rather disagree	Rather agree	Rather disagree	Rather agree	Agree	Rather disagree	Rather disagree	Rather agree	Rather disagree	Rather disagree	Rather agree	Rather disagree	Rather agree	Rather disagree	Rather agree	Rather disagree	Rather agree	Rather agree	Rather agree	Rather disagree	Rather disagree	Rather disagree	Rather agree	Rather disagree	Rather agree
2018-10-18 19:02:49	Strongly disagree	Disagree	Strongly disagree	Strongly disagree	Strongly disagree	Strongly disagree	Strongly disagree	Strongly disagree	Strongly disagree	Strongly disagree	Neither agree or disagree	Neither agree or disagree	Rather disagree	Strongly disagree	Rather agree	Strongly disagree	Agree	Rather agree	Rather agree	Rather disagree	Rather disagree	Rather disagree	Strongly disagree	Strongly disagree	Strongly disagree	Rather disagree	Rather disagree	Rather agree	Rather disagree	Rather disagree	Rather disagree	Neither agree or disagree	Rather agree	Rather disagree	Neither agree or disagree	Rather agree	Neither agree or disagree	Neither agree or disagree	Neither agree or disagree	Rather agree	Neither agree or disagree	Rather disagree	Strongly disagree	Rather agree	Neither agree or disagree	Rather agree	Neither agree or disagree	Rather agree	Strongly agree
2018-10-18 19:40:08	Strongly disagree	Strongly disagree	Strongly disagree	Strongly disagree	Neither agree or disagree	Disagree	Strongly disagree	Strongly disagree	Strongly disagree	Strongly disagree	Strongly disagree	Strongly disagree	Strongly disagree	Strongly disagree	Strongly disagree	Strongly disagree	Strongly disagree	Strongly disagree	Strongly disagree	Strongly disagree	Strongly disagree	Strongly disagree	Strongly disagree	Strongly disagree	Strongly disagree	Strongly agree	Strongly disagree	Strongly agree	Strongly agree	Strongly disagree	Strongly disagree	Strongly agree	Disagree	Strongly disagree	Strongly agree	Strongly disagree	Strongly agree	Strongly disagree	Strongly agree	Neither agree or disagree	Agree	Strongly agree	Disagree	Strongly disagree	Strongly disagree	Strongly disagree	Strongly agree	Strongly disagree	Strongly agree
2018-10-18 19:48:04	Neither agree or disagree	Strongly disagree	Strongly disagree	Neither agree or disagree	Rather agree	Agree	Rather agree	Neither agree or disagree	Neither agree or disagree	Strongly disagree	Strongly disagree	Strongly disagree	Strongly disagree	Neither agree or disagree	Strongly disagree	Strongly disagree	Disagree	Strongly disagree	Strongly disagree	Strongly disagree	Strongly disagree	Strongly disagree	Strongly disagree	Strongly disagree	Strongly disagree	Rather agree	Strongly disagree	Agree	Strongly agree	Strongly disagree	Strongly disagree	Agree	Rather agree	Strongly disagree	Rather agree	Rather agree	Rather agree	Rather disagree	Rather agree	Rather agree	Rather disagree	Rather agree	Rather disagree	Rather disagree	Rather agree	Rather agree	Rather disagree	Rather agree	Strongly agree
2018-10-18 21:31:09	Rather disagree	Strongly disagree	Rather agree	Rather agree	Rather agree	Agree	Rather disagree	Agree	Strongly agree	Rather agree	Rather agree	Agree	Neither agree or disagree	Rather disagree	Rather agree	Rather disagree	Disagree	Disagree	Strongly disagree	Strongly disagree	Disagree	Rather disagree	Neither agree or disagree	Rather disagree	Rather agree	Rather agree	Rather disagree	Agree	Agree	Disagree	Disagree	Rather agree	Rather agree	Disagree	Agree	Rather agree	Rather agree	Rather agree	Agree	Rather agree	Agree	Neither agree or disagree	Rather agree	Rather agree	Disagree	Rather agree	Agree	Rather agree	Rather agree
2018-10-18 21:32:06	Strongly disagree	Strongly disagree	Strongly disagree	Strongly disagree	Rather agree	Rather disagree	Strongly disagree	Disagree	Rather disagree	Strongly disagree	Neither agree or disagree	Neither agree or disagree	Rather disagree	Neither agree or disagree	Rather agree	Neither agree or disagree	Neither agree or disagree	Neither agree or disagree	Neither agree or disagree	Neither agree or disagree	Neither agree or disagree	Neither agree or disagree	Neither agree or disagree	Neither agree or disagree	Neither agree or disagree	Agree	Rather disagree	Agree	Rather agree	Disagree	Neither agree or disagree	Strongly agree	Neither agree or disagree	Strongly disagree	Strongly agree	Neither agree or disagree	Strongly agree	Rather agree	Strongly agree	Rather agree	Strongly agree	Strongly agree	Rather disagree	Disagree	Rather disagree	Rather agree	Strongly agree	Rather disagree	Strongly agree
2018-10-18 22:00:38	Strongly disagree	Rather agree	Neither agree or disagree	Agree	Rather agree	Rather agree	Rather disagree	Rather disagree	Rather agree	Rather disagree	Rather agree	Agree	Disagree	Strongly disagree	Rather disagree	Disagree	Rather disagree	Strongly disagree	Strongly disagree	Strongly disagree	Strongly disagree	Strongly disagree	Disagree	Strongly disagree	Disagree	Strongly agree	Rather disagree	Strongly agree	Strongly agree	Rather disagree	Disagree	Strongly agree	Disagree	Strongly disagree	Strongly agree	Rather disagree	Strongly agree	Rather agree	Strongly agree	Rather disagree	Agree	Agree	Rather disagree	Rather disagree	Disagree	Rather disagree	Strongly agree	Neither agree or disagree	Strongly agree
2018-10-18 22:10:00	Rather agree	Rather agree	Neither agree or disagree	Agree	Strongly agree	Strongly agree	Agree	Rather disagree	Rather agree	Neither agree or disagree	Rather disagree	Agree	Rather agree	Rather agree	Agree	Agree	Rather disagree	Rather disagree	Rather disagree	Disagree	Disagree	Disagree	Disagree	Disagree	Neither agree or disagree	Strongly agree	Rather disagree	Strongly agree	Strongly agree	Disagree	Disagree	Strongly agree	Agree	Strongly disagree	Strongly agree	Rather agree	Strongly agree	Rather disagree	Strongly agree	Rather agree	Strongly agree	Strongly agree	Rather agree	Disagree	Disagree	Disagree	Strongly agree	Disagree	Agree
2018-10-18 22:12:34	Rather disagree	Neither agree or disagree	Strongly disagree	Rather agree	Rather agree	Agree	Rather agree	Disagree	Rather agree	Strongly disagree	Rather disagree	Disagree	Strongly disagree	Strongly disagree	Strongly disagree	Strongly disagree	Strongly disagree	Strongly disagree	Strongly disagree	Strongly disagree	Strongly disagree	Strongly disagree	Strongly disagree	Strongly disagree	Strongly disagree	Strongly agree	Neither agree or disagree	Strongly agree	Strongly agree	Strongly disagree	Strongly disagree	Strongly agree	Strongly agree	Strongly disagree	Strongly agree	Strongly disagree	Strongly agree	Strongly disagree	Strongly agree	Rather agree	Agree	Strongly agree	Rather agree	Strongly disagree	Strongly disagree	Rather agree	Strongly agree	Rather agree	Strongly agree
2018-10-18 22:14:26	Rather agree	Strongly agree	Rather agree	Strongly agree	Agree	Agree	Agree	Rather agree	Agree	Agree	Rather agree	Neither agree or disagree	Rather agree	Neither agree or disagree	Neither agree or disagree	Neither agree or disagree	Neither agree or disagree	Neither agree or disagree	Strongly disagree	Neither agree or disagree	Neither agree or disagree	Neither agree or disagree	Neither agree or disagree	Neither agree or disagree	Neither agree or disagree	Rather agree	Agree	Agree	Rather agree	Rather agree	Agree	Rather agree	Agree	Rather agree	Rather disagree	Rather agree	Rather agree	Neither agree or disagree	Rather agree	Agree	Neither agree or disagree	Rather disagree	Rather agree	Neither agree or disagree	Agree	Neither agree or disagree	Neither agree or disagree	Strongly disagree	Agree
2018-10-18 22:20:59	Rather agree	Neither agree or disagree	Neither agree or disagree	Agree	Agree	Strongly agree	Rather agree	Disagree	Neither agree or disagree	Disagree	Rather disagree	Rather agree	Rather disagree	Strongly disagree	Strongly disagree	Neither agree or disagree	Strongly disagree	Strongly disagree	Strongly disagree	Strongly disagree	Strongly disagree	Strongly disagree	Strongly disagree	Strongly disagree	Strongly disagree	Neither agree or disagree	Strongly agree	Rather agree	Rather agree	Rather agree	Strongly agree	Rather agree	Strongly agree	Agree	Rather disagree	Agree	Rather disagree	Neither agree or disagree	Rather disagree	Rather agree	Disagree	Disagree	Rather disagree	Neither agree or disagree	Rather disagree	Rather disagree	Strongly disagree	Strongly disagree	Agree
2018-10-18 22:23:05	Rather disagree	Rather disagree	Rather disagree	Rather agree	Neither agree or disagree	Neither agree or disagree	Rather disagree	Strongly disagree	Rather agree	Strongly disagree	Rather disagree	Rather agree	Rather disagree	Neither agree or disagree	Rather disagree	Neither agree or disagree	Disagree	Disagree	Strongly disagree	Disagree	Disagree	Strongly disagree	Strongly disagree	Disagree	Neither agree or disagree	Rather disagree	Rather agree	Rather agree	Rather agree	Rather disagree	Rather agree	Rather agree	Rather agree	Disagree	Rather agree	Rather disagree	Agree	Rather agree	Rather agree	Rather agree	Rather agree	Rather disagree	Rather disagree	Rather agree	Strongly disagree	Neither agree or disagree	Rather agree	Rather agree	Strongly agree
2018-10-18 22:29:22	Rather disagree	Rather disagree	Rather disagree	Rather agree	Neither agree or disagree	Rather agree	Neither agree or disagree	Strongly disagree	Disagree	Strongly disagree	Strongly disagree	Disagree	Strongly disagree	Strongly disagree	Strongly disagree	Disagree	Strongly disagree	Strongly disagree	Strongly disagree	Strongly disagree	Strongly disagree	Strongly disagree	Strongly disagree	Strongly disagree	Strongly disagree	Rather agree	Rather agree	Agree	Agree	Rather disagree	Rather agree	Rather agree	Agree	Disagree	Rather agree	Rather disagree	Rather agree	Rather disagree	Rather agree	Rather disagree	Rather agree	Rather agree	Rather agree	Rather disagree	Rather disagree	Neither agree or disagree	Rather agree	Neither agree or disagree	Agree
2018-10-19 05:29:13	Disagree	Strongly disagree	Strongly disagree	Strongly disagree	Rather agree	Rather agree	Strongly disagree	Strongly disagree	Rather disagree	Disagree	Rather disagree	Neither agree or disagree	Neither agree or disagree	Strongly disagree	Strongly disagree	Neither agree or disagree	Strongly disagree	Strongly disagree	Strongly disagree	Strongly disagree	Strongly disagree	Strongly disagree	Neither agree or disagree	Neither agree or disagree	Strongly disagree	Rather agree	Rather agree	Agree	Agree	Rather disagree	Rather disagree	Rather agree	Agree	Strongly disagree	Rather agree	Rather disagree	Agree	Disagree	Agree	Rather disagree	Rather agree	Rather agree	Rather disagree	Rather disagree	Disagree	Disagree	Rather agree	Strongly disagree	Strongly agree
2018-10-20 19:54:39	Rather disagree	Agree	Rather agree	Strongly agree	Strongly agree	Strongly agree	Strongly agree	Strongly disagree	Rather disagree	Rather agree	Rather agree	Agree	Neither agree or disagree	Rather disagree	Rather agree	Rather agree	Disagree	Strongly disagree	Strongly disagree	Strongly disagree	Strongly disagree	Strongly disagree	Disagree	Disagree	Neither agree or disagree	Rather agree	Rather agree	Strongly agree	Strongly agree	Rather disagree	Disagree	Strongly agree	Strongly disagree	Strongly disagree	Agree	Strongly disagree	Strongly agree	Rather agree	Rather agree	Rather agree	Rather agree	Rather disagree	Strongly disagree	Disagree	Strongly disagree	Strongly disagree	Rather agree	Strongly disagree	Agree
2018-10-20 20:02:21	Disagree	Neither agree or disagree	Neither agree or disagree	Strongly agree	Agree	Strongly agree	Rather agree	Rather agree	Rather agree	Agree	Neither agree or disagree	Rather agree	Neither agree or disagree	Rather disagree	Neither agree or disagree	Rather disagree	Disagree	Disagree	Strongly disagree	Strongly disagree	Strongly disagree	Strongly disagree	Strongly disagree	Strongly disagree	Strongly disagree	Neither agree or disagree	Rather agree	Agree	Agree	Disagree	Rather disagree	Strongly agree	Rather disagree	Strongly disagree	Strongly agree	Rather agree	Agree	Disagree	Agree	Neither agree or disagree	Agree	Rather agree	Disagree	Agree	Strongly disagree	Rather agree	Rather agree	Agree	Rather agree
2018-10-20 20:02:34	Rather disagree	Strongly agree	Rather agree	Strongly agree	Strongly agree	Strongly agree	Strongly agree	Rather agree	Strongly agree	Strongly agree	Rather agree	Strongly agree	Agree	Strongly agree	Strongly agree	Agree	Rather disagree	Strongly disagree	Strongly disagree	Strongly disagree	Strongly disagree	Strongly disagree	Neither agree or disagree	Neither agree or disagree	Neither agree or disagree	Rather agree	Rather agree	Agree	Agree	Rather disagree	Rather agree	Rather agree	Disagree	Strongly disagree	Rather agree	Strongly disagree	Rather agree	Strongly disagree	Rather agree	Rather disagree	Rather agree	Rather disagree	Rather disagree	Rather disagree	Disagree	Disagree	Rather disagree	Disagree	Strongly agree
2018-10-20 20:04:55	Rather agree	Strongly agree	Agree	Strongly agree	Agree	Agree	Rather agree	Rather disagree	Rather agree	Rather disagree	Rather agree	Rather agree	Rather disagree	Agree	Agree	Rather disagree	Rather agree	Strongly disagree	Strongly disagree	Strongly disagree	Strongly disagree	Strongly disagree	Neither agree or disagree	Neither agree or disagree	Neither agree or disagree	Rather agree	Rather disagree	Agree	Agree	Disagree	Rather disagree	Agree	Disagree	Strongly disagree	Agree	Rather disagree	Strongly agree	Rather disagree	Agree	Rather agree	Agree	Rather agree	Rather disagree	Rather disagree	Rather disagree	Strongly disagree	Agree	Rather disagree	Strongly agree
2018-10-20 20:07:46	Agree	Rather agree	Rather disagree	Strongly agree	Strongly agree	Strongly agree	Rather agree	Rather disagree	Strongly disagree	Strongly disagree	Rather disagree	Neither agree or disagree	Neither agree or disagree	Neither agree or disagree	Neither agree or disagree	Neither agree or disagree	Rather disagree	Neither agree or disagree	Strongly disagree	Disagree	Disagree	Disagree	Rather agree	Rather disagree	Rather agree	Rather disagree	Agree	Strongly agree	Rather agree	Agree	Rather agree	Rather agree	Rather disagree	Strongly disagree	Rather agree	Agree	Rather agree	Agree	Rather disagree	Rather agree	Rather agree	Rather disagree	Agree	Rather agree	Disagree	Rather agree	Rather disagree	Agree	Agree
2018-10-20 20:08:40	Rather agree	Strongly agree	Agree	Strongly agree	Agree	Strongly agree	Strongly agree	Strongly agree	Rather agree	Rather agree	Strongly agree	Strongly agree	Agree	Agree	Rather agree	Agree	Neither agree or disagree	Neither agree or disagree	Disagree	Disagree	Strongly disagree	Disagree	Agree	Rather agree	Rather agree	Neither agree or disagree	Agree	Neither agree or disagree	Agree	Rather agree	Strongly agree	Rather agree	Agree	Rather agree	Neither agree or disagree	Strongly agree	Rather agree	Agree	Agree	Strongly agree	Rather agree	Rather disagree	Rather agree	Agree	Neither agree or disagree	Strongly agree	Disagree	Agree	Rather disagree
2018-10-20 21:20:31	Strongly disagree	Disagree	Strongly disagree	Strongly disagree	Strongly disagree	Neither agree or disagree	Strongly disagree	Strongly disagree	Strongly disagree	Strongly disagree	Strongly disagree	Neither agree or disagree	Strongly disagree	Strongly disagree	Strongly disagree	Strongly disagree	Strongly disagree	Strongly disagree	Strongly disagree	Strongly disagree	Strongly disagree	Strongly disagree	Strongly disagree	Strongly disagree	Strongly disagree	Rather agree	Strongly disagree	Rather agree	Rather agree	Disagree	Strongly disagree	Rather agree	Disagree	Strongly disagree	Rather agree	Neither agree or disagree	Rather agree	Strongly disagree	Rather agree	Rather agree	Rather agree	Rather disagree	Strongly disagree	Strongly disagree	Strongly disagree	Strongly disagree	Rather agree	Strongly disagree	Rather agree
2018-10-20 23:31:32	Rather agree	Rather agree	Rather agree	Agree	Agree	Agree	Rather agree	Neither agree or disagree	Neither agree or disagree	Agree	Rather disagree	Rather agree	Disagree	Rather agree	Agree	Rather agree	Neither agree or disagree	Rather agree	Disagree	Neither agree or disagree	Neither agree or disagree	Neither agree or disagree	Neither agree or disagree	Neither agree or disagree	Neither agree or disagree	Rather agree	Rather agree	Agree	Agree	Agree	Agree	Rather agree	Rather agree	Rather disagree	Rather agree	Neither agree or disagree	Agree	Rather disagree	Rather agree	Rather disagree	Agree	Strongly agree	Agree	Neither agree or disagree	Agree	Agree	Rather agree	Neither agree or disagree	Rather agree
2018-10-20 23:38:32	Rather disagree	Strongly agree	Rather agree	Strongly agree	Strongly agree	Strongly agree	Agree	Rather agree	Rather agree	Agree	Strongly disagree	Strongly disagree	Strongly disagree	Strongly disagree	Strongly disagree	Strongly disagree	Strongly disagree	Strongly disagree	Strongly disagree	Strongly disagree	Strongly disagree	Strongly disagree	Strongly disagree	Strongly disagree	Strongly disagree	Strongly disagree	Strongly agree	Rather disagree	Disagree	Strongly agree	Strongly agree	Strongly disagree	Neither agree or disagree	Strongly agree	Neither agree or disagree	Agree	Neither agree or disagree	Neither agree or disagree	Strongly disagree	Strongly agree	Strongly disagree	Strongly disagree	Neither agree or disagree	Neither agree or disagree	Rather disagree	Agree	Strongly disagree	Rather disagree	Rather agree
2018-10-20 23:39:34	Agree	Rather agree	Disagree	Neither agree or disagree	Rather agree	Rather agree	Rather agree	Strongly disagree	Rather disagree	Rather agree	Rather disagree	Rather disagree	Rather disagree	Neither agree or disagree	Neither agree or disagree	Rather disagree	Strongly disagree	Strongly disagree	Strongly disagree	Strongly disagree	Strongly disagree	Strongly disagree	Rather disagree	Disagree	Strongly disagree	Agree	Rather disagree	Strongly agree	Strongly agree	Rather disagree	Disagree	Strongly agree	Strongly disagree	Strongly disagree	Agree	Neither agree or disagree	Strongly agree	Strongly disagree	Rather agree	Rather agree	Rather agree	Strongly agree	Disagree	Strongly disagree	Strongly disagree	Strongly disagree	Agree	Rather agree	Strongly agree
2018-10-21 16:45:39	Rather disagree	Agree	Rather agree	Strongly agree	Strongly agree	Strongly agree	Rather agree	Rather disagree	Neither agree or disagree	Rather agree	Rather agree	Strongly agree	Strongly disagree	Neither agree or disagree	Neither agree or disagree	Neither agree or disagree	Strongly disagree	Strongly disagree	Strongly disagree	Strongly disagree	Strongly disagree	Strongly disagree	Neither agree or disagree	Strongly disagree	Neither agree or disagree	Rather agree	Rather disagree	Agree	Strongly agree	Disagree	Disagree	Strongly agree	Rather disagree	Strongly disagree	Agree	Strongly disagree	Strongly agree	Rather agree	Neither agree or disagree	Rather disagree	Rather agree	Rather disagree	Strongly disagree	Disagree	Strongly disagree	Rather disagree	Neither agree or disagree	Disagree	Rather agree
2018-10-21 21:15:35	Neither agree or disagree	Strongly agree	Strongly agree	Strongly agree	Strongly agree	Strongly agree	Strongly agree	Strongly agree	Strongly agree	Strongly agree	Rather agree	Strongly agree	Strongly agree	Strongly agree	Strongly agree	Strongly agree	Strongly agree	Strongly agree	Disagree	Strongly disagree	Strongly disagree	Strongly disagree	Agree	Rather agree	Rather agree	Strongly agree	Strongly agree	Rather disagree	Rather agree	Rather disagree	Strongly agree	Strongly disagree	Agree	Rather agree	Strongly disagree	Agree	Agree	Strongly agree	Disagree	Strongly agree	Rather disagree	Disagree	Strongly disagree	Rather agree	Agree	Agree	Strongly disagree	Strongly agree	Rather agree
2018-10-21 21:33:13	Neither agree or disagree	Neither agree or disagree	Neither agree or disagree	Neither agree or disagree	Agree	Rather agree	Strongly disagree	Strongly disagree	Strongly disagree	Strongly disagree	Strongly disagree	Strongly disagree	Strongly disagree	Neither agree or disagree	Neither agree or disagree	Neither agree or disagree	Neither agree or disagree	Neither agree or disagree	Neither agree or disagree	Neither agree or disagree	Neither agree or disagree	Neither agree or disagree	Neither agree or disagree	Neither agree or disagree	Neither agree or disagree	Strongly agree	Strongly agree	Strongly agree	Strongly agree	Strongly disagree	Strongly disagree	Strongly agree	Strongly disagree	Strongly disagree	Strongly agree	Strongly agree	Strongly agree	Agree	Strongly agree	Strongly agree	Strongly agree	Strongly agree	Rather disagree	Strongly agree	Strongly disagree	Strongly disagree	Strongly agree	Strongly agree	Strongly agree
2018-10-22 14:10:35	Neither agree or disagree	Rather agree	Agree	Rather agree	Rather agree	Agree	Rather agree	Rather disagree	Neither agree or disagree	Strongly disagree	Rather agree	Strongly agree	Neither agree or disagree	Neither agree or disagree	Rather agree	Rather agree	Rather agree	Neither agree or disagree	Strongly disagree	Strongly disagree	Strongly disagree	Strongly disagree	Rather agree	Neither agree or disagree	Rather agree	Strongly disagree	Strongly agree	Rather agree	Rather agree	Strongly agree	Strongly agree	Neither agree or disagree	Strongly agree	Strongly agree	Rather disagree	Agree	Neither agree or disagree	Agree	Neither agree or disagree	Strongly agree	Strongly disagree	Strongly disagree	Strongly agree	Strongly disagree	Rather disagree	Strongly agree	Strongly disagree	Strongly disagree	Neither agree or disagree
2018-10-23 10:16:57	Rather disagree	Neither agree or disagree	Rather disagree	Rather disagree	Rather agree	Agree	Strongly disagree	Rather disagree	Rather agree	Rather disagree	Neither agree or disagree	Neither agree or disagree	Disagree	Strongly disagree	Rather agree	Strongly disagree	Agree	Rather agree	Rather agree	Disagree	Disagree	Strongly disagree	Rather disagree	Rather disagree	Disagree	Rather disagree	Rather agree	Agree	Rather agree	Rather disagree	Agree	Rather agree	Rather agree	Rather disagree	Rather agree	Strongly agree	Agree	Rather agree	Rather agree	Strongly agree	Rather agree	Rather disagree	Strongly agree	Rather agree	Disagree	Rather agree	Rather agree	Agree	Agree
2018-10-23 10:44:47	Neither agree or disagree	Strongly agree	Rather agree	Agree	Rather agree	Agree	Rather agree	Disagree	Neither agree or disagree	Strongly disagree	Rather agree	Rather agree	Rather agree	Neither agree or disagree	Neither agree or disagree	Rather agree	Rather disagree	Rather agree	Neither agree or disagree	Rather agree	Strongly agree	Neither agree or disagree	Disagree	Rather agree	Rather agree	Rather agree	Agree	Agree	Agree	Rather disagree	Rather agree	Rather agree	Rather disagree	Strongly disagree	Rather agree	Rather disagree	Agree	Disagree	Rather agree	Rather disagree	Rather agree	Agree	Neither agree or disagree	Rather disagree	Disagree	Neither agree or disagree	Rather disagree	Rather agree	Agree
2018-10-23 11:10:00	Rather disagree	Rather agree	Rather disagree	Rather agree	Agree	Rather agree	Rather agree	Disagree	Rather disagree	Strongly disagree	Rather disagree	Neither agree or disagree	Neither agree or disagree	Neither agree or disagree	Neither agree or disagree	Neither agree or disagree	Disagree	Neither agree or disagree	Strongly disagree	Disagree	Neither agree or disagree	Neither agree or disagree	Neither agree or disagree	Neither agree or disagree	Neither agree or disagree	Rather agree	Rather agree	Strongly agree	Agree	Rather disagree	Neither agree or disagree	Agree	Rather agree	Disagree	Rather agree	Rather agree	Agree	Rather disagree	Agree	Rather agree	Rather agree	Rather agree	Rather agree	Rather disagree	Rather disagree	Rather disagree	Rather agree	Disagree	Strongly agree
2018-10-23 11:10:35	Rather agree	Neither agree or disagree	Rather disagree	Rather agree	Agree	Agree	Rather agree	Rather disagree	Rather agree	Disagree	Disagree	Neither agree or disagree	Disagree	Neither agree or disagree	Rather agree	Neither agree or disagree	Neither agree or disagree	Neither agree or disagree	Disagree	Rather disagree	Rather disagree	Rather disagree	Rather disagree	Rather disagree	Rather disagree	Rather agree	Rather disagree	Agree	Strongly agree	Rather disagree	Rather disagree	Rather agree	Rather disagree	Rather disagree	Rather agree	Rather disagree	Rather agree	Rather disagree	Strongly agree	Rather disagree	Rather agree	Neither agree or disagree	Rather disagree	Rather disagree	Rather disagree	Rather disagree	Rather agree	Rather disagree	Rather agree
2018-10-23 11:11:26	Strongly disagree	Strongly disagree	Strongly disagree	Neither agree or disagree	Disagree	Disagree	Strongly disagree	Strongly disagree	Strongly disagree	Strongly disagree	Neither agree or disagree	Neither agree or disagree	Strongly disagree	Neither agree or disagree	Strongly disagree	Neither agree or disagree	Strongly disagree	Strongly disagree	Strongly disagree	Strongly disagree	Strongly disagree	Strongly disagree	Strongly disagree	Strongly disagree	Strongly disagree	Rather agree	Agree	Strongly agree	Strongly agree	Rather agree	Rather agree	Strongly agree	Rather agree	Rather agree	Neither agree or disagree	Agree	Strongly agree	Rather agree	Agree	Agree	Rather agree	Disagree	Agree	Agree	Rather agree	Rather agree	Rather disagree	Rather agree	Agree
2018-10-23 11:49:35	Rather agree	Rather agree	Rather agree	Rather agree	Agree	Agree	Rather agree	Rather agree	Rather disagree	Neither agree or disagree	Disagree	Disagree	Disagree	Neither agree or disagree	Neither agree or disagree	Neither agree or disagree	Neither agree or disagree	Neither agree or disagree	Disagree	Disagree	Disagree	Rather disagree	Disagree	Disagree	Rather disagree	Agree	Rather agree	Agree	Agree	Rather disagree	Rather disagree	Agree	Neither agree or disagree	Rather disagree	Rather agree	Neither agree or disagree	Rather agree	Rather disagree	Rather agree	Neither agree or disagree	Rather agree	Rather agree	Rather disagree	Rather disagree	Rather disagree	Rather agree	Neither agree or disagree	Rather disagree	Rather agree
2018-10-23 17:22:09	Rather agree	Agree	Rather agree	Agree	Agree	Strongly agree	Disagree	Disagree	Disagree	Neither agree or disagree	Agree	Strongly agree	Strongly agree	Strongly agree	Rather agree	Strongly agree	Disagree	Strongly disagree	Strongly disagree	Strongly disagree	Strongly disagree	Strongly disagree	Rather agree	Agree	Strongly agree	Rather agree	Rather agree	Agree	Agree	Disagree	Agree	Agree	Disagree	Disagree	Rather agree	Agree	Rather agree	Rather disagree	Rather disagree	Agree	Rather disagree	Rather agree	Rather disagree	Strongly disagree	Strongly disagree	Rather disagree	Rather disagree	Rather agree	Agree
2018-10-23 22:01:54	Neither agree or disagree	Rather disagree	Neither agree or disagree	Neither agree or disagree	Rather agree	Rather agree	Rather disagree	Disagree	Disagree	Disagree	Rather disagree	Rather disagree	Strongly disagree	Strongly disagree	Strongly disagree	Strongly disagree	Strongly disagree	Strongly disagree	Strongly disagree	Strongly disagree	Strongly disagree	Strongly disagree	Strongly disagree	Strongly disagree	Strongly disagree	Strongly agree	Rather disagree	Agree	Agree	Rather disagree	Rather disagree	Strongly agree	Rather disagree	Disagree	Agree	Neither agree or disagree	Rather agree	Disagree	Strongly agree	Disagree	Strongly agree	Strongly agree	Rather agree	Strongly disagree	Strongly disagree	Strongly disagree	Agree	Neither agree or disagree	Strongly agree
2018-10-24 09:47:13	Strongly disagree	Strongly disagree	Strongly disagree	Strongly disagree	Neither agree or disagree	Neither agree or disagree	Strongly disagree	Strongly disagree	Strongly disagree	Strongly disagree	Strongly disagree	Strongly disagree	Strongly disagree	Strongly disagree	Strongly disagree	Neither agree or disagree	Strongly disagree	Strongly disagree	Strongly disagree	Strongly disagree	Strongly disagree	Strongly disagree	Neither agree or disagree	Neither agree or disagree	Neither agree or disagree	Rather agree	Rather agree	Strongly agree	Agree	Neither agree or disagree	Agree	Rather agree	Strongly disagree	Strongly disagree	Rather agree	Neither agree or disagree	Strongly agree	Strongly disagree	Strongly agree	Rather agree	Rather agree	Rather agree	Strongly disagree	Neither agree or disagree	Strongly agree	Agree	Rather disagree	Agree	Strongly agree
2018-10-24 09:55:35	Rather disagree	Neither agree or disagree	Strongly disagree	Rather disagree	Neither agree or disagree	Rather agree	Strongly disagree	Strongly disagree	Strongly disagree	Strongly disagree	Strongly disagree	Neither agree or disagree	Strongly disagree	Strongly disagree	Strongly disagree	Neither agree or disagree	Neither agree or disagree	Neither agree or disagree	Strongly disagree	Neither agree or disagree	Neither agree or disagree	Neither agree or disagree	Neither agree or disagree	Neither agree or disagree	Neither agree or disagree	Strongly agree	Rather agree	Strongly agree	Strongly agree	Strongly disagree	Rather agree	Strongly agree	Rather agree	Strongly disagree	Strongly agree	Strongly agree	Strongly agree	Rather disagree	Strongly agree	Agree	Agree	Rather disagree	Rather agree	Rather agree	Rather disagree	Disagree	Agree	Agree	Agree
2018-10-24 10:06:02	Rather agree	Strongly disagree	Strongly disagree	Strongly disagree	Rather agree	Strongly agree	Rather agree	Strongly disagree	Strongly disagree	Strongly disagree	Neither agree or disagree	Neither agree or disagree	Neither agree or disagree	Strongly disagree	Strongly disagree	Strongly disagree	Strongly disagree	Strongly disagree	Strongly disagree	Strongly disagree	Strongly disagree	Strongly disagree	Strongly disagree	Strongly disagree	Strongly disagree	Rather agree	Rather agree	Rather agree	Strongly agree	Rather agree	Strongly agree	Rather agree	Strongly agree	Rather disagree	Rather disagree	Rather agree	Agree	Agree	Rather agree	Rather agree	Rather disagree	Disagree	Rather agree	Agree	Rather disagree	Rather agree	Rather disagree	Rather disagree	Agree
2018-10-24 12:06:10	Rather agree	Rather agree	Disagree	Rather agree	Strongly agree	Agree	Agree	Agree	Rather disagree	Rather agree	Rather disagree	Rather disagree	Strongly disagree	Neither agree or disagree	Agree	Strongly disagree	Rather agree	Neither agree or disagree	Strongly disagree	Strongly disagree	Strongly disagree	Rather agree	Rather disagree	Rather agree	Rather disagree	Rather agree	Rather agree	Strongly agree	Rather agree	Rather disagree	Rather disagree	Rather agree	Strongly disagree	Strongly disagree	Rather agree	Agree	Rather agree	Disagree	Strongly agree	Rather agree	Agree	Disagree	Rather agree	Strongly disagree	Disagree	Disagree	Neither agree or disagree	Strongly disagree	Agree
2018-10-24 12:25:04	Rather agree	Neither agree or disagree	Neither agree or disagree	Agree	Agree	Agree	Rather agree	Rather disagree	Agree	Rather agree	Neither agree or disagree	Neither agree or disagree	Neither agree or disagree	Neither agree or disagree	Neither agree or disagree	Neither agree or disagree	Neither agree or disagree	Neither agree or disagree	Neither agree or disagree	Neither agree or disagree	Neither agree or disagree	Neither agree or disagree	Neither agree or disagree	Neither agree or disagree	Neither agree or disagree	Rather agree	Agree	Rather agree	Rather agree	Rather agree	Rather agree	Agree	Rather agree	Rather disagree	Rather agree	Agree	Rather agree	Agree	Rather disagree	Agree	Rather agree	Disagree	Rather agree	Rather agree	Rather disagree	Rather disagree	Disagree	Agree	Rather agree
2018-10-24 12:30:41	Agree	Neither agree or disagree	Agree	Strongly agree	Agree	Agree	Rather agree	Rather agree	Strongly agree	Agree	Agree	Agree	Rather agree	Rather agree	Rather agree	Rather disagree	Neither agree or disagree	Rather disagree	Neither agree or disagree	Strongly disagree	Neither agree or disagree	Strongly disagree	Neither agree or disagree	Rather agree	Rather agree	Disagree	Agree	Agree	Rather disagree	Strongly agree	Strongly agree	Rather agree	Strongly agree	Strongly agree	Rather disagree	Neither agree or disagree	Rather agree	Rather agree	Rather agree	Strongly agree	Strongly disagree	Rather disagree	Strongly agree	Rather agree	Neither agree or disagree	Strongly agree	Strongly disagree	Strongly agree	Strongly agree
2018-10-24 12:34:36	Rather agree	Neither agree or disagree	Neither agree or disagree	Agree	Strongly agree	Strongly agree	Rather agree	Rather disagree	Rather disagree	Rather disagree	Strongly agree	Strongly agree	Neither agree or disagree	Neither agree or disagree	Rather agree	Rather agree	Strongly disagree	Strongly disagree	Strongly disagree	Strongly disagree	Strongly disagree	Strongly disagree	Neither agree or disagree	Neither agree or disagree	Neither agree or disagree	Rather agree	Rather agree	Rather agree	Rather agree	Rather agree	Agree	Rather agree	Agree	Rather disagree	Rather agree	Agree	Rather agree	Rather disagree	Rather agree	Rather agree	Rather agree	Agree	Rather agree	Rather agree	Strongly disagree	Neither agree or disagree	Rather agree	Strongly agree	Strongly agree
2018-10-24 12:36:50	Agree	Rather agree	Rather agree	Agree	Agree	Agree	Agree	Rather agree	Strongly agree	Rather agree	Strongly agree	Strongly agree	Neither agree or disagree	Strongly agree	Strongly agree	Agree	Strongly disagree	Rather disagree	Strongly agree	Strongly agree	Strongly agree	Strongly agree	Strongly agree	Strongly agree	Strongly agree	Strongly agree	Disagree	Rather agree	Disagree	Strongly disagree	Strongly disagree	Strongly agree	Strongly agree	Strongly disagree	Agree	Neither agree or disagree	Strongly agree	Disagree	Agree	Neither agree or disagree	Agree	Rather agree	Agree	Rather disagree	Strongly disagree	Neither agree or disagree	Neither agree or disagree	Agree	Agree
2018-10-24 12:37:05	Disagree	Disagree	Strongly disagree	Strongly agree	Strongly agree	Strongly agree	Rather agree	Rather agree	Strongly agree	Rather disagree	Rather disagree	Neither agree or disagree	Rather disagree	Strongly agree	Strongly agree	Strongly agree	Strongly disagree	Strongly agree	Strongly agree	Strongly agree	Strongly agree	Strongly agree	Strongly agree	Strongly agree	Strongly agree	Strongly agree	Strongly disagree	Rather disagree	Rather disagree	Strongly disagree	Strongly disagree	Strongly agree	Neither agree or disagree	Strongly disagree	Neither agree or disagree	Neither agree or disagree	Agree	Strongly disagree	Agree	Rather disagree	Strongly agree	Rather agree	Neither agree or disagree	Disagree	Strongly disagree	Neither agree or disagree	Neither agree or disagree	Strongly agree	Rather agree
2018-10-24 12:38:29	Strongly disagree	Strongly disagree	Strongly disagree	Strongly disagree	Strongly disagree	Strongly disagree	Strongly disagree	Strongly disagree	Strongly disagree	Strongly disagree	Strongly disagree	Strongly disagree	Strongly disagree	Strongly disagree	Strongly disagree	Strongly disagree	Strongly disagree	Strongly disagree	Strongly disagree	Strongly disagree	Strongly disagree	Strongly disagree	Strongly disagree	Strongly disagree	Strongly disagree	Rather agree	Rather disagree	Rather agree	Agree	Rather disagree	Rather disagree	Rather agree	Rather disagree	Rather disagree	Strongly agree	Rather disagree	Strongly agree	Rather disagree	Strongly agree	Disagree	Strongly agree	Strongly agree	Strongly disagree	Strongly agree	Strongly disagree	Strongly disagree	Strongly agree	Disagree	Rather agree
2018-10-24 12:40:36	Neither agree or disagree	Neither agree or disagree	Neither agree or disagree	Rather agree	Rather agree	Rather agree	Rather agree	Rather disagree	Rather agree	Rather disagree	Neither agree or disagree	Neither agree or disagree	Rather disagree	Strongly disagree	Neither agree or disagree	Neither agree or disagree	Strongly disagree	Strongly disagree	Neither agree or disagree	Strongly disagree	Neither agree or disagree	Neither agree or disagree	Neither agree or disagree	Neither agree or disagree	Neither agree or disagree	Agree	Strongly disagree	Strongly agree	Strongly agree	Strongly disagree	Strongly disagree	Strongly agree	Strongly agree	Strongly disagree	Strongly agree	Neither agree or disagree	Strongly agree	Strongly disagree	Strongly agree	Rather disagree	Strongly agree	Strongly agree	Disagree	Rather disagree	Strongly disagree	Strongly disagree	Strongly agree	Strongly disagree	Strongly agree
2018-10-24 12:41:09	Rather agree	Neither agree or disagree	Rather disagree	Rather agree	Rather agree	Rather disagree	Strongly disagree	Rather disagree	Strongly disagree	Strongly disagree	Neither agree or disagree	Neither agree or disagree	Strongly disagree	Strongly disagree	Neither agree or disagree	Neither agree or disagree	Neither agree or disagree	Neither agree or disagree	Neither agree or disagree	Neither agree or disagree	Neither agree or disagree	Neither agree or disagree	Neither agree or disagree	Neither agree or disagree	Neither agree or disagree	Rather agree	Rather agree	Agree	Rather agree	Rather disagree	Rather disagree	Strongly agree	Agree	Strongly disagree	Agree	Rather agree	Rather agree	Rather agree	Rather agree	Rather agree	Rather agree	Agree	Rather disagree	Rather disagree	Rather disagree	Rather disagree	Strongly agree	Rather agree	Agree
2018-10-24 12:44:11	Strongly disagree	Strongly disagree	Strongly disagree	Strongly disagree	Rather agree	Rather agree	Disagree	Disagree	Disagree	Strongly disagree	Neither agree or disagree	Neither agree or disagree	Neither agree or disagree	Neither agree or disagree	Neither agree or disagree	Neither agree or disagree	Neither agree or disagree	Neither agree or disagree	Neither agree or disagree	Neither agree or disagree	Neither agree or disagree	Neither agree or disagree	Neither agree or disagree	Neither agree or disagree	Neither agree or disagree	Rather agree	Rather agree	Strongly agree	Rather agree	Rather disagree	Rather disagree	Strongly agree	Strongly disagree	Strongly disagree	Rather agree	Disagree	Agree	Strongly disagree	Rather agree	Rather disagree	Neither agree or disagree	Rather agree	Rather disagree	Neither agree or disagree	Disagree	Disagree	Neither agree or disagree	Neither agree or disagree	Agree
2018-10-24 12:44:52	Rather disagree	Rather disagree	Rather disagree	Rather agree	Neither agree or disagree	Agree	Rather agree	Strongly disagree	Disagree	Disagree	Disagree	Disagree	Rather disagree	Disagree	Rather disagree	Rather disagree	Disagree	Strongly disagree	Strongly disagree	Strongly disagree	Disagree	Strongly disagree	Strongly disagree	Strongly disagree	Strongly disagree	Rather agree	Rather agree	Agree	Rather agree	Rather disagree	Rather disagree	Agree	Agree	Disagree	Rather agree	Neither agree or disagree	Rather agree	Rather disagree	Rather agree	Neither agree or disagree	Rather agree	Rather agree	Rather disagree	Disagree	Rather disagree	Rather disagree	Rather agree	Rather disagree	Strongly agree
2018-10-24 12:45:45	Neither agree or disagree	Rather agree	Neither agree or disagree	Disagree	Strongly agree	Strongly agree	Rather disagree	Disagree	Disagree	Strongly disagree	Strongly agree	Strongly agree	Rather disagree	Agree	Agree	Rather agree	Neither agree or disagree	Neither agree or disagree	Neither agree or disagree	Neither agree or disagree	Neither agree or disagree	Neither agree or disagree	Neither agree or disagree	Agree	Rather agree	Strongly agree	Rather agree	Strongly agree	Strongly agree	Rather agree	Neither agree or disagree	Strongly agree	Strongly agree	Neither agree or disagree	Rather agree	Strongly agree	Strongly agree	Agree	Strongly agree	Rather agree	Strongly agree	Strongly agree	Strongly agree	Strongly agree	Strongly disagree	Strongly disagree	Strongly agree	Agree	Strongly agree
2018-10-24 12:55:27	Rather disagree	Agree	Neither agree or disagree	Strongly agree	Strongly agree	Agree	Rather agree	Disagree	Disagree	Strongly disagree	Disagree	Disagree	Strongly disagree	Neither agree or disagree	Neither agree or disagree	Neither agree or disagree	Neither agree or disagree	Neither agree or disagree	Neither agree or disagree	Neither agree or disagree	Neither agree or disagree	Neither agree or disagree	Neither agree or disagree	Neither agree or disagree	Neither agree or disagree	Agree	Rather disagree	Rather agree	Agree	Rather disagree	Neither agree or disagree	Rather agree	Rather agree	Disagree	Agree	Rather agree	Agree	Disagree	Agree	Rather disagree	Agree	Agree	Rather disagree	Neither agree or disagree	Disagree	Neither agree or disagree	Agree	Rather agree	Rather agree
2018-10-24 12:55:52	Rather agree	Strongly agree	Rather agree	Strongly agree	Strongly agree	Agree	Rather disagree	Rather disagree	Rather agree	Strongly disagree	Agree	Strongly agree	Neither agree or disagree	Neither agree or disagree	Rather agree	Agree	Rather disagree	Disagree	Neither agree or disagree	Neither agree or disagree	Neither agree or disagree	Neither agree or disagree	Neither agree or disagree	Rather agree	Neither agree or disagree	Rather disagree	Agree	Strongly agree	Rather agree	Rather agree	Agree	Agree	Strongly agree	Agree	Rather disagree	Strongly agree	Neither agree or disagree	Agree	Strongly agree	Strongly agree	Rather agree	Strongly agree	Rather disagree	Rather disagree	Strongly disagree	Strongly agree	Rather agree	Strongly agree	Rather disagree
2018-10-24 12:59:09	Strongly disagree	Strongly disagree	Strongly disagree	Disagree	Neither agree or disagree	Rather disagree	Disagree	Rather disagree	Disagree	Strongly disagree	Strongly agree	Neither agree or disagree	Disagree	Disagree	Neither agree or disagree	Neither agree or disagree	Rather disagree	Disagree	Strongly disagree	Rather disagree	Disagree	Disagree	Neither agree or disagree	Neither agree or disagree	Neither agree or disagree	Agree	Disagree	Agree	Strongly agree	Disagree	Strongly disagree	Rather agree	Neither agree or disagree	Strongly disagree	Strongly agree	Rather disagree	Neither agree or disagree	Disagree	Rather disagree	Rather agree	Agree	Rather agree	Rather disagree	Rather disagree	Agree	Neither agree or disagree	Agree	Neither agree or disagree	Neither agree or disagree
2018-10-24 13:01:31	Neither agree or disagree	Neither agree or disagree	Rather disagree	Rather agree	Rather agree	Strongly agree	Disagree	Rather agree	Disagree	Neither agree or disagree	Strongly disagree	Neither agree or disagree	Neither agree or disagree	Disagree	Neither agree or disagree	Disagree	Rather agree	Agree	Strongly disagree	Neither agree or disagree	Neither agree or disagree	Neither agree or disagree	Rather agree	Rather agree	Rather agree	Agree	Rather disagree	Agree	Agree	Strongly disagree	Strongly disagree	Strongly agree	Neither agree or disagree	Strongly disagree	Strongly agree	Neither agree or disagree	Agree	Disagree	Rather disagree	Strongly disagree	Strongly agree	Strongly agree	Rather agree	Rather disagree	Neither agree or disagree	Agree	Strongly agree	Rather agree	Strongly agree
2018-10-24 13:03:55	Strongly disagree	Strongly disagree	Strongly disagree	Strongly disagree	Strongly disagree	Strongly disagree	Strongly disagree	Strongly disagree	Strongly disagree	Strongly disagree	Strongly disagree	Strongly disagree	Strongly disagree	Strongly disagree	Strongly disagree	Strongly disagree	Strongly disagree	Strongly disagree	Strongly disagree	Strongly disagree	Strongly disagree	Strongly disagree	Strongly disagree	Strongly disagree	Strongly disagree	Strongly agree	Strongly disagree	Strongly agree	Strongly agree	Strongly agree	Strongly disagree	Strongly agree	Strongly disagree	Strongly disagree	Strongly agree	Strongly disagree	Strongly agree	Neither agree or disagree	Strongly agree	Strongly disagree	Strongly agree	Strongly agree	Strongly agree	Strongly disagree	Strongly disagree	Strongly disagree	Strongly agree	Strongly disagree	Strongly disagree
2018-10-24 13:05:51	Rather disagree	Neither agree or disagree	Neither agree or disagree	Rather agree	Rather agree	Rather agree	Rather disagree	Rather disagree	Rather disagree	Rather disagree	Neither agree or disagree	Neither agree or disagree	Rather disagree	Neither agree or disagree	Neither agree or disagree	Neither agree or disagree	Neither agree or disagree	Neither agree or disagree	Neither agree or disagree	Neither agree or disagree	Neither agree or disagree	Neither agree or disagree	Neither agree or disagree	Neither agree or disagree	Neither agree or disagree	Disagree	Agree	Rather disagree	Rather disagree	Neither agree or disagree	Rather agree	Rather agree	Rather agree	Rather agree	Rather disagree	Agree	Rather disagree	Rather agree	Agree	Agree	Neither agree or disagree	Rather disagree	Rather disagree	Rather disagree	Rather disagree	Rather disagree	Disagree	Agree	Rather agree
2018-10-24 13:05:59	Rather agree	Disagree	Disagree	Agree	Agree	Agree	Rather disagree	Rather agree	Agree	Strongly agree	Rather disagree	Strongly agree	Strongly agree	Agree	Rather agree	Rather agree	Rather disagree	Neither agree or disagree	Neither agree or disagree	Neither agree or disagree	Neither agree or disagree	Neither agree or disagree	Neither agree or disagree	Rather agree	Rather agree	Strongly agree	Strongly agree	Strongly agree	Rather agree	Rather agree	Strongly agree	Rather agree	Neither agree or disagree	Strongly agree	Rather agree	Strongly agree	Strongly agree	Strongly agree	Rather agree	Rather disagree	Rather agree	Neither agree or disagree	Rather agree	Rather disagree	Neither agree or disagree	Strongly disagree	Rather disagree	Strongly agree	Rather agree
2018-10-24 13:09:11	Rather disagree	Rather disagree	Rather disagree	Rather disagree	Rather agree	Rather agree	Rather agree	Rather disagree	Rather disagree	Rather disagree	Rather disagree	Neither agree or disagree	Neither agree or disagree	Neither agree or disagree	Neither agree or disagree	Neither agree or disagree	Neither agree or disagree	Neither agree or disagree	Neither agree or disagree	Neither agree or disagree	Neither agree or disagree	Neither agree or disagree	Neither agree or disagree	Neither agree or disagree	Neither agree or disagree	Rather agree	Neither agree or disagree	Rather agree	Rather agree	Neither agree or disagree	Neither agree or disagree	Neither agree or disagree	Neither agree or disagree	Neither agree or disagree	Neither agree or disagree	Neither agree or disagree	Neither agree or disagree	Neither agree or disagree	Rather agree	Neither agree or disagree	Neither agree or disagree	Rather agree	Rather agree	Rather disagree	Rather disagree	Rather agree	Neither agree or disagree	Neither agree or disagree	Rather agree
2018-10-24 13:12:12	Rather agree	Neither agree or disagree	Neither agree or disagree	Strongly agree	Strongly agree	Strongly agree	Strongly agree	Strongly agree	Rather agree	Rather agree	Rather agree	Strongly agree	Strongly agree	Strongly agree	Neither agree or disagree	Agree	Neither agree or disagree	Neither agree or disagree	Neither agree or disagree	Disagree	Rather disagree	Rather disagree	Rather disagree	Rather disagree	Rather disagree	Strongly agree	Strongly disagree	Strongly agree	Strongly agree	Strongly disagree	Disagree	Strongly agree	Neither agree or disagree	Neither agree or disagree	Strongly agree	Rather agree	Strongly agree	Rather agree	Strongly agree	Rather agree	Strongly agree	Agree	Rather agree	Rather disagree	Strongly disagree	Agree	Strongly agree	Agree	Agree
2018-10-24 13:16:19	Neither agree or disagree	Neither agree or disagree	Rather disagree	Agree	Rather agree	Agree	Rather agree	Rather disagree	Rather disagree	Strongly disagree	Strongly disagree	Rather disagree	Rather disagree	Strongly disagree	Neither agree or disagree	Neither agree or disagree	Strongly disagree	Strongly disagree	Strongly disagree	Strongly disagree	Strongly disagree	Strongly disagree	Strongly disagree	Strongly disagree	Strongly disagree	Strongly agree	Rather disagree	Rather agree	Rather agree	Rather disagree	Rather disagree	Agree	Strongly disagree	Strongly disagree	Agree	Rather disagree	Rather agree	Rather disagree	Rather agree	Rather agree	Rather agree	Rather agree	Rather disagree	Rather disagree	Rather disagree	Rather disagree	Rather agree	Rather disagree	Rather agree
2018-10-24 13:16:24	Rather agree	Strongly agree	Rather agree	Strongly agree	Agree	Strongly agree	Agree	Neither agree or disagree	Neither agree or disagree	Rather agree	Rather agree	Agree	Rather agree	Rather disagree	Rather agree	Rather agree	Rather disagree	Neither agree or disagree	Rather disagree	Strongly disagree	Disagree	Rather disagree	Neither agree or disagree	Neither agree or disagree	Neither agree or disagree	Rather disagree	Rather agree	Rather agree	Rather disagree	Agree	Strongly agree	Neither agree or disagree	Neither agree or disagree	Strongly agree	Disagree	Rather agree	Rather disagree	Rather agree	Neither agree or disagree	Agree	Disagree	Neither agree or disagree	Strongly agree	Agree	Rather disagree	Rather agree	Disagree	Strongly agree	Rather agree
2018-10-24 13:17:16	Disagree	Neither agree or disagree	Rather disagree	Rather disagree	Rather agree	Rather disagree	Rather disagree	Rather disagree	Disagree	Disagree	Rather agree	Neither agree or disagree	Disagree	Neither agree or disagree	Neither agree or disagree	Neither agree or disagree	Neither agree or disagree	Rather disagree	Disagree	Strongly disagree	Disagree	Strongly disagree	Strongly disagree	Disagree	Strongly disagree	Strongly agree	Strongly disagree	Strongly agree	Strongly agree	Strongly disagree	Strongly disagree	Strongly agree	Rather disagree	Strongly disagree	Strongly agree	Rather agree	Strongly agree	Rather disagree	Rather agree	Rather disagree	Strongly agree	Rather agree	Neither agree or disagree	Rather disagree	Strongly disagree	Disagree	Agree	Rather disagree	Strongly agree
2018-10-24 13:20:30	Strongly disagree	Strongly disagree	Strongly disagree	Neither agree or disagree	Rather agree	Rather agree	Rather disagree	Strongly disagree	Strongly disagree	Disagree	Strongly disagree	Strongly disagree	Strongly disagree	Strongly disagree	Strongly disagree	Strongly disagree	Strongly disagree	Strongly disagree	Strongly disagree	Strongly disagree	Strongly disagree	Strongly disagree	Strongly disagree	Strongly disagree	Strongly disagree	Rather agree	Rather disagree	Rather agree	Agree	Rather disagree	Rather disagree	Agree	Rather disagree	Disagree	Agree	Rather disagree	Agree	Rather disagree	Neither agree or disagree	Neither agree or disagree	Rather agree	Rather agree	Rather disagree	Rather disagree	Neither agree or disagree	Rather disagree	Rather agree	Rather disagree	Agree
2018-10-24 13:33:29	Rather agree	Rather agree	Rather disagree	Strongly agree	Strongly agree	Strongly agree	Strongly agree	Disagree	Disagree	Strongly disagree	Disagree	Strongly disagree	Strongly disagree	Strongly disagree	Strongly disagree	Strongly disagree	Strongly disagree	Strongly disagree	Strongly disagree	Strongly disagree	Strongly disagree	Strongly disagree	Strongly disagree	Neither agree or disagree	Neither agree or disagree	Rather agree	Rather agree	Agree	Rather agree	Disagree	Rather agree	Rather agree	Agree	Rather disagree	Rather agree	Rather agree	Rather disagree	Agree	Rather agree	Agree	Rather agree	Rather disagree	Agree	Agree	Rather agree	Neither agree or disagree	Rather agree	Rather agree	Rather agree
2018-10-24 13:33:50	Rather agree	Strongly agree	Rather agree	Agree	Strongly agree	Strongly agree	Agree	Rather disagree	Rather disagree	Rather disagree	Rather disagree	Rather agree	Neither agree or disagree	Rather disagree	Neither agree or disagree	Neither agree or disagree	Neither agree or disagree	Neither agree or disagree	Strongly disagree	Strongly disagree	Strongly disagree	Neither agree or disagree	Strongly disagree	Strongly disagree	Neither agree or disagree	Rather agree	Rather disagree	Rather agree	Agree	Rather disagree	Disagree	Rather agree	Rather disagree	Disagree	Rather agree	Strongly disagree	Agree	Disagree	Rather agree	Rather agree	Agree	Rather agree	Rather disagree	Disagree	Disagree	Disagree	Agree	Rather disagree	Rather agree
2018-10-24 13:34:59	Rather disagree	Rather agree	Rather disagree	Neither agree or disagree	Neither agree or disagree	Rather agree	Rather agree	Strongly disagree	Strongly disagree	Disagree	Strongly disagree	Strongly disagree	Strongly disagree	Strongly disagree	Strongly disagree	Strongly disagree	Strongly disagree	Strongly disagree	Strongly disagree	Strongly disagree	Strongly disagree	Strongly disagree	Strongly disagree	Strongly disagree	Strongly disagree	Neither agree or disagree	Rather agree	Rather agree	Rather agree	Neither agree or disagree	Rather agree	Rather agree	Agree	Agree	Rather disagree	Agree	Neither agree or disagree	Agree	Rather agree	Agree	Neither agree or disagree	Rather agree	Agree	Neither agree or disagree	Neither agree or disagree	Neither agree or disagree	Rather disagree	Rather agree	Rather agree
2018-10-24 13:48:10	Rather agree	Strongly agree	Strongly disagree	Agree	Rather disagree	Strongly agree	Rather agree	Disagree	Agree	Strongly disagree	Strongly disagree	Strongly disagree	Strongly disagree	Strongly disagree	Strongly disagree	Strongly disagree	Strongly disagree	Strongly disagree	Strongly disagree	Strongly disagree	Strongly disagree	Strongly disagree	Strongly disagree	Strongly disagree	Strongly disagree	Rather disagree	Rather disagree	Rather agree	Rather agree	Rather agree	Rather disagree	Rather agree	Rather agree	Rather agree	Rather disagree	Rather agree	Rather agree	Rather disagree	Rather disagree	Rather agree	Rather disagree	Rather disagree	Rather disagree	Rather disagree	Strongly disagree	Strongly disagree	Rather disagree	Strongly disagree	Strongly agree
2018-10-24 13:52:02	Strongly disagree	Agree	Rather disagree	Strongly agree	Strongly agree	Strongly agree	Strongly agree	Rather agree	Rather agree	Rather agree	Rather disagree	Rather agree	Rather agree	Agree	Agree	Neither agree or disagree	Rather agree	Neither agree or disagree	Strongly disagree	Strongly disagree	Strongly disagree	Strongly disagree	Rather agree	Neither agree or disagree	Rather agree	Rather agree	Rather agree	Rather agree	Rather agree	Rather agree	Rather agree	Rather agree	Neither agree or disagree	Rather disagree	Rather agree	Rather agree	Rather agree	Disagree	Agree	Neither agree or disagree	Neither agree or disagree	Rather agree	Rather disagree	Disagree	Disagree	Rather agree	Rather agree	Strongly disagree	Strongly agree
2018-10-24 13:52:12	Strongly disagree	Agree	Rather disagree	Strongly agree	Strongly agree	Strongly agree	Strongly agree	Rather agree	Rather agree	Rather agree	Rather disagree	Rather agree	Rather agree	Agree	Agree	Neither agree or disagree	Rather agree	Neither agree or disagree	Strongly disagree	Strongly disagree	Strongly disagree	Strongly disagree	Rather agree	Neither agree or disagree	Rather agree	Rather agree	Rather agree	Rather agree	Rather agree	Rather agree	Rather agree	Rather agree	Neither agree or disagree	Rather disagree	Rather agree	Rather agree	Rather agree	Disagree	Agree	Neither agree or disagree	Neither agree or disagree	Rather agree	Rather disagree	Disagree	Disagree	Rather agree	Rather agree	Strongly disagree	Strongly agree
2018-10-24 14:15:15	Rather agree	Agree	Rather agree	Rather agree	Agree	Strongly agree	Rather agree	Disagree	Disagree	Disagree	Agree	Strongly agree	Agree	Agree	Agree	Agree	Neither agree or disagree	Disagree	Disagree	Disagree	Rather disagree	Disagree	Neither agree or disagree	Rather agree	Neither agree or disagree	Agree	Neither agree or disagree	Rather agree	Rather agree	Rather disagree	Rather disagree	Rather agree	Rather disagree	Disagree	Rather agree	Rather disagree	Agree	Neither agree or disagree	Agree	Rather disagree	Agree	Agree	Rather disagree	Rather disagree	Neither agree or disagree	Rather disagree	Agree	Rather disagree	Agree
2018-10-24 14:19:05	Rather disagree	Rather disagree	Rather disagree	Rather agree	Rather agree	Rather agree	Rather disagree	Rather disagree	Rather disagree	Rather disagree	Disagree	Rather disagree	Disagree	Disagree	Rather disagree	Disagree	Disagree	Disagree	Strongly disagree	Disagree	Disagree	Disagree	Disagree	Disagree	Disagree	Strongly agree	Rather disagree	Strongly agree	Strongly agree	Strongly disagree	Disagree	Strongly agree	Disagree	Strongly disagree	Strongly agree	Rather disagree	Strongly agree	Disagree	Agree	Rather disagree	Agree	Agree	Rather disagree	Rather disagree	Disagree	Disagree	Strongly agree	Rather disagree	Agree
2018-10-24 14:32:13	Strongly disagree	Strongly disagree	Rather disagree	Strongly agree	Strongly agree	Agree	Rather agree	Agree	Strongly agree	Rather agree	Strongly agree	Agree	Disagree	Rather disagree	Neither agree or disagree	Rather agree	Strongly disagree	Strongly disagree	Neither agree or disagree	Rather disagree	Rather disagree	Neither agree or disagree	Neither agree or disagree	Neither agree or disagree	Neither agree or disagree	Agree	Strongly disagree	Rather agree	Rather agree	Rather disagree	Rather agree	Rather disagree	Rather disagree	Rather disagree	Rather agree	Agree	Rather agree	Neither agree or disagree	Rather disagree	Rather disagree	Rather agree	Rather agree	Rather disagree	Rather disagree	Rather disagree	Rather disagree	Rather agree	Rather disagree	Rather agree
2018-10-24 14:32:54	Neither agree or disagree	Neither agree or disagree	Rather disagree	Rather agree	Rather agree	Rather agree	Rather agree	Rather disagree	Neither agree or disagree	Rather disagree	Rather disagree	Rather disagree	Neither agree or disagree	Disagree	Disagree	Rather disagree	Agree	Disagree	Disagree	Rather disagree	Strongly disagree	Disagree	Disagree	Strongly disagree	Strongly disagree	Strongly agree	Rather agree	Agree	Rather agree	Disagree	Neither agree or disagree	Agree	Disagree	Strongly disagree	Rather agree	Rather disagree	Rather agree	Rather disagree	Rather agree	Rather agree	Rather agree	Rather agree	Neither agree or disagree	Disagree	Rather disagree	Rather disagree	Agree	Strongly disagree	Rather agree
2018-10-24 14:43:11	Rather disagree	Strongly disagree	Strongly disagree	Rather disagree	Agree	Agree	Disagree	Strongly disagree	Disagree	Rather disagree	Neither agree or disagree	Rather disagree	Disagree	Strongly disagree	Rather disagree	Strongly disagree	Strongly disagree	Strongly disagree	Strongly disagree	Strongly disagree	Strongly disagree	Strongly disagree	Disagree	Neither agree or disagree	Neither agree or disagree	Rather agree	Strongly disagree	Strongly agree	Strongly agree	Rather disagree	Neither agree or disagree	Strongly agree	Neither agree or disagree	Strongly disagree	Agree	Rather agree	Rather agree	Neither agree or disagree	Neither agree or disagree	Rather agree	Rather agree	Agree	Rather agree	Rather agree	Rather disagree	Rather agree	Neither agree or disagree	Disagree	Agree
2018-10-24 14:46:26	Rather disagree	Disagree	Strongly disagree	Rather agree	Rather agree	Rather agree	Neither agree or disagree	Strongly disagree	Disagree	Strongly disagree	Strongly disagree	Strongly disagree	Strongly disagree	Strongly disagree	Strongly disagree	Neither agree or disagree	Strongly disagree	Strongly disagree	Strongly disagree	Strongly disagree	Strongly disagree	Strongly disagree	Strongly disagree	Strongly disagree	Strongly disagree	Rather agree	Rather disagree	Strongly agree	Agree	Disagree	Rather disagree	Agree	Rather agree	Strongly disagree	Agree	Agree	Agree	Rather agree	Agree	Rather agree	Rather agree	Rather disagree	Disagree	Rather disagree	Rather disagree	Rather disagree	Neither agree or disagree	Agree	Strongly agree
2018-10-24 14:46:48	Strongly disagree	Strongly disagree	Strongly disagree	Strongly disagree	Rather disagree	Rather disagree	Disagree	Rather disagree	Disagree	Strongly disagree	Strongly disagree	Disagree	Rather disagree	Disagree	Disagree	Rather disagree	Disagree	Strongly disagree	Strongly disagree	Rather disagree	Rather disagree	Disagree	Rather disagree	Disagree	Neither agree or disagree	Rather agree	Rather agree	Rather agree	Agree	Rather disagree	Rather agree	Rather agree	Agree	Rather disagree	Agree	Rather agree	Strongly agree	Rather disagree	Agree	Rather agree	Strongly agree	Agree	Rather disagree	Rather agree	Rather agree	Rather agree	Rather disagree	Rather agree	Strongly agree
2018-10-24 14:47:18	Rather disagree	Neither agree or disagree	Rather agree	Agree	Rather agree	Agree	Rather disagree	Disagree	Rather disagree	Strongly disagree	Rather disagree	Rather disagree	Neither agree or disagree	Strongly disagree	Strongly disagree	Strongly disagree	Strongly disagree	Strongly disagree	Strongly disagree	Strongly disagree	Strongly disagree	Strongly disagree	Strongly disagree	Strongly disagree	Strongly disagree	Rather agree	Rather disagree	Agree	Rather agree	Rather agree	Rather disagree	Rather agree	Neither agree or disagree	Disagree	Rather agree	Rather agree	Rather agree	Disagree	Agree	Rather agree	Agree	Agree	Rather agree	Neither agree or disagree	Rather disagree	Rather disagree	Agree	Rather disagree	Agree
2018-10-24 14:47:18	Rather disagree	Strongly disagree	Strongly disagree	Strongly disagree	Strongly disagree	Strongly disagree	Strongly disagree	Strongly disagree	Strongly disagree	Disagree	Strongly disagree	Strongly disagree	Strongly disagree	Strongly disagree	Strongly disagree	Strongly disagree	Strongly disagree	Strongly disagree	Strongly disagree	Strongly disagree	Strongly disagree	Strongly disagree	Strongly disagree	Strongly disagree	Strongly disagree	Strongly disagree	Rather disagree	Rather agree	Agree	Rather disagree	Rather disagree	Agree	Neither agree or disagree	Strongly disagree	Rather agree	Rather agree	Rather agree	Rather disagree	Agree	Rather disagree	Agree	Agree	Rather agree	Rather disagree	Disagree	Rather disagree	Agree	Rather disagree	Agree
2018-10-24 14:47:39	Rather disagree	Neither agree or disagree	Disagree	Rather disagree	Neither agree or disagree	Neither agree or disagree	Disagree	Strongly disagree	Disagree	Strongly disagree	Rather disagree	Rather disagree	Disagree	Disagree	Disagree	Disagree	Disagree	Disagree	Disagree	Disagree	Disagree	Disagree	Disagree	Disagree	Disagree	Disagree	Disagree	Agree	Rather agree	Rather agree	Rather agree	Rather agree	Rather disagree	Rather disagree	Rather agree	Neither agree or disagree	Neither agree or disagree	Neither agree or disagree	Neither agree or disagree	Neither agree or disagree	Neither agree or disagree	Neither agree or disagree	Neither agree or disagree	Neither agree or disagree	Neither agree or disagree	Neither agree or disagree	Neither agree or disagree	Neither agree or disagree	Neither agree or disagree
2018-10-24 14:51:55	Rather agree	Rather agree	Rather disagree	Rather agree	Strongly agree	Strongly agree	Rather agree	Rather agree	Strongly agree	Rather agree	Neither agree or disagree	Rather agree	Rather agree	Agree	Strongly disagree	Neither agree or disagree	Strongly disagree	Strongly disagree	Strongly disagree	Strongly disagree	Strongly disagree	Strongly disagree	Strongly disagree	Strongly disagree	Strongly disagree	Rather agree	Rather disagree	Agree	Strongly agree	Rather agree	Strongly disagree	Agree	Rather agree	Strongly disagree	Strongly agree	Neither agree or disagree	Agree	Strongly disagree	Strongly agree	Strongly disagree	Strongly agree	Agree	Strongly disagree	Strongly disagree	Strongly disagree	Strongly disagree	Strongly agree	Strongly disagree	Strongly agree
2018-10-24 14:54:20	Strongly disagree	Rather disagree	Rather disagree	Agree	Rather agree	Rather agree	Rather agree	Rather disagree	Rather disagree	Disagree	Rather agree	Rather agree	Rather agree	Neither agree or disagree	Neither agree or disagree	Neither agree or disagree	Rather disagree	Rather agree	Disagree	Neither agree or disagree	Neither agree or disagree	Neither agree or disagree	Neither agree or disagree	Neither agree or disagree	Rather agree	Strongly agree	Strongly disagree	Agree	Strongly agree	Rather disagree	Strongly disagree	Agree	Rather agree	Strongly disagree	Agree	Rather disagree	Agree	Neither agree or disagree	Strongly agree	Rather disagree	Agree	Agree	Disagree	Neither agree or disagree	Disagree	Rather agree	Agree	Rather disagree	Agree
2018-10-24 14:55:48	Strongly disagree	Neither agree or disagree	Strongly disagree	Rather agree	Rather agree	Rather agree	Rather disagree	Strongly disagree	Strongly disagree	Strongly agree	Strongly disagree	Rather agree	Neither agree or disagree	Strongly agree	Strongly agree	Strongly agree	Neither agree or disagree	Disagree	Neither agree or disagree	Rather disagree	Neither agree or disagree	Neither agree or disagree	Neither agree or disagree	Neither agree or disagree	Rather disagree	Rather agree	Agree	Strongly agree	Neither agree or disagree	Agree	Neither agree or disagree	Neither agree or disagree	Rather disagree	Rather disagree	Strongly agree	Strongly agree	Agree	Strongly agree	Strongly agree	Strongly agree	Agree	Neither agree or disagree	Neither agree or disagree	Neither agree or disagree	Disagree	Rather agree	Strongly agree	Strongly agree	Disagree
2018-10-24 15:08:47	Strongly disagree	Strongly disagree	Disagree	Neither agree or disagree	Strongly agree	Agree	Disagree	Rather agree	Rather agree	Rather disagree	Rather agree	Strongly agree	Disagree	Agree	Rather agree	Agree	Strongly disagree	Strongly disagree	Strongly disagree	Strongly disagree	Strongly disagree	Strongly disagree	Neither agree or disagree	Neither agree or disagree	Neither agree or disagree	Agree	Strongly disagree	Strongly agree	Strongly agree	Disagree	Strongly disagree	Strongly agree	Disagree	Strongly disagree	Strongly agree	Strongly disagree	Strongly agree	Strongly disagree	Strongly agree	Strongly disagree	Strongly agree	Rather agree	Rather agree	Disagree	Disagree	Rather disagree	Agree	Strongly disagree	Strongly agree
2018-10-24 15:09:33	Rather disagree	Disagree	Rather agree	Rather disagree	Agree	Strongly agree	Agree	Rather agree	Agree	Strongly disagree	Agree	Neither agree or disagree	Rather agree	Rather disagree	Agree	Rather agree	Strongly agree	Rather agree	Agree	Rather disagree	Disagree	Strongly disagree	Rather agree	Agree	Rather disagree	Rather disagree	Rather disagree	Agree	Neither agree or disagree	Agree	Rather agree	Rather agree	Rather agree	Rather agree	Rather agree	Agree	Rather disagree	Agree	Rather agree	Agree	Agree	Agree	Agree	Rather agree	Strongly disagree	Agree	Neither agree or disagree	Rather agree	Agree
2018-10-24 15:12:07	Strongly disagree	Strongly disagree	Strongly disagree	Strongly disagree	Neither agree or disagree	Rather agree	Strongly disagree	Rather disagree	Rather disagree	Rather disagree	Disagree	Rather agree	Strongly disagree	Disagree	Neither agree or disagree	Neither agree or disagree	Strongly disagree	Rather agree	Strongly disagree	Strongly disagree	Disagree	Strongly disagree	Strongly disagree	Disagree	Disagree	Rather agree	Strongly disagree	Rather agree	Rather agree	Rather agree	Rather agree	Neither agree or disagree	Disagree	Rather disagree	Rather agree	Strongly agree	Rather agree	Strongly disagree	Rather disagree	Agree	Rather agree	Rather agree	Disagree	Rather agree	Neither agree or disagree	Rather agree	Rather disagree	Rather agree	Strongly agree
2018-10-24 15:16:09	Strongly disagree	Neither agree or disagree	Strongly disagree	Rather disagree	Rather agree	Rather agree	Rather disagree	Disagree	Rather disagree	Strongly disagree	Rather disagree	Neither agree or disagree	Disagree	Neither agree or disagree	Neither agree or disagree	Neither agree or disagree	Strongly disagree	Strongly disagree	Strongly disagree	Neither agree or disagree	Neither agree or disagree	Strongly disagree	Neither agree or disagree	Neither agree or disagree	Neither agree or disagree	Rather disagree	Agree	Rather agree	Rather agree	Rather disagree	Agree	Rather disagree	Rather disagree	Rather agree	Disagree	Strongly agree	Rather agree	Agree	Rather agree	Strongly agree	Rather disagree	Disagree	Rather agree	Strongly agree	Disagree	Agree	Rather disagree	Rather agree	Strongly agree
2018-10-24 15:31:14	Strongly disagree	Strongly disagree	Strongly disagree	Rather agree	Neither agree or disagree	Rather agree	Rather disagree	Disagree	Strongly disagree	Strongly disagree	Strongly disagree	Strongly disagree	Strongly disagree	Strongly disagree	Strongly disagree	Strongly disagree	Strongly disagree	Strongly disagree	Strongly disagree	Strongly disagree	Strongly disagree	Strongly disagree	Strongly disagree	Strongly disagree	Strongly disagree	Agree	Rather disagree	Agree	Agree	Neither agree or disagree	Disagree	Agree	Disagree	Strongly disagree	Agree	Rather disagree	Rather agree	Rather disagree	Rather agree	Rather disagree	Rather agree	Agree	Rather agree	Rather disagree	Neither agree or disagree	Rather disagree	Agree	Neither agree or disagree	Agree
2018-10-24 15:46:21	Strongly disagree	Strongly disagree	Strongly disagree	Strongly disagree	Disagree	Disagree	Strongly disagree	Strongly disagree	Strongly disagree	Strongly disagree	Rather disagree	Disagree	Strongly disagree	Strongly disagree	Disagree	Disagree	Strongly disagree	Strongly disagree	Strongly disagree	Strongly disagree	Strongly disagree	Strongly disagree	Strongly disagree	Strongly disagree	Strongly disagree	Agree	Disagree	Strongly agree	Strongly agree	Strongly disagree	Strongly disagree	Strongly agree	Agree	Strongly disagree	Agree	Disagree	Strongly agree	Disagree	Agree	Rather disagree	Agree	Agree	Disagree	Strongly disagree	Disagree	Strongly disagree	Agree	Disagree	Agree
2018-10-24 15:49:04	Neither agree or disagree	Rather agree	Rather disagree	Rather agree	Agree	Agree	Neither agree or disagree	Rather disagree	Rather agree	Disagree	Rather disagree	Rather disagree	Disagree	Disagree	Disagree	Disagree	Disagree	Disagree	Disagree	Strongly disagree	Strongly disagree	Strongly disagree	Strongly disagree	Strongly disagree	Strongly disagree	Rather agree	Rather agree	Rather agree	Neither agree or disagree	Rather agree	Rather agree	Neither agree or disagree	Agree	Rather agree	Rather agree	Rather agree	Rather agree	Rather agree	Agree	Neither agree or disagree	Rather agree	Rather agree	Neither agree or disagree	Rather disagree	Rather agree	Rather agree	Rather disagree	Neither agree or disagree	Neither agree or disagree
2018-10-24 16:25:08	Rather agree	Rather agree	Rather agree	Rather agree	Rather agree	Agree	Agree	Rather agree	Strongly agree	Rather agree	Rather disagree	Rather agree	Rather disagree	Neither agree or disagree	Rather agree	Rather agree	Rather disagree	Neither agree or disagree	Disagree	Disagree	Rather disagree	Rather disagree	Neither agree or disagree	Rather agree	Rather agree	Rather agree	Rather agree	Agree	Agree	Disagree	Rather agree	Agree	Rather agree	Rather disagree	Rather agree	Rather agree	Rather agree	Rather agree	Agree	Rather agree	Rather agree	Agree	Rather agree	Rather agree	Agree	Rather agree	Rather agree	Rather agree	Agree
2018-10-24 16:29:30	Neither agree or disagree	Rather agree	Neither agree or disagree	Rather agree	Rather agree	Rather agree	Rather agree	Disagree	Rather disagree	Rather disagree	Neither agree or disagree	Neither agree or disagree	Neither agree or disagree	Neither agree or disagree	Neither agree or disagree	Neither agree or disagree	Neither agree or disagree	Neither agree or disagree	Neither agree or disagree	Neither agree or disagree	Neither agree or disagree	Neither agree or disagree	Rather disagree	Rather disagree	Rather disagree	Rather agree	Rather agree	Rather agree	Rather agree	Neither agree or disagree	Rather agree	Rather agree	Strongly disagree	Rather disagree	Rather agree	Rather agree	Rather agree	Rather disagree	Rather agree	Rather agree	Rather agree	Rather agree	Rather disagree	Rather agree	Strongly disagree	Rather agree	Rather agree	Rather agree	Rather agree
2018-10-24 16:32:05	Rather disagree	Neither agree or disagree	Disagree	Rather disagree	Strongly disagree	Rather disagree	Strongly disagree	Disagree	Strongly disagree	Disagree	Disagree	Rather disagree	Disagree	Disagree	Rather disagree	Disagree	Rather disagree	Rather disagree	Disagree	Disagree	Neither agree or disagree	Neither agree or disagree	Neither agree or disagree	Neither agree or disagree	Neither agree or disagree	Rather agree	Neither agree or disagree	Rather agree	Rather agree	Neither agree or disagree	Rather agree	Rather agree	Rather agree	Rather disagree	Rather agree	Neither agree or disagree	Rather agree	Neither agree or disagree	Rather agree	Neither agree or disagree	Rather agree	Neither agree or disagree	Neither agree or disagree	Neither agree or disagree	Rather disagree	Neither agree or disagree	Rather agree	Neither agree or disagree	Rather agree
2018-10-24 16:53:41	Rather disagree	Rather agree	Neither agree or disagree	Agree	Agree	Agree	Rather disagree	Disagree	Rather disagree	Rather disagree	Rather agree	Rather agree	Rather agree	Agree	Rather agree	Rather agree	Rather agree	Neither agree or disagree	Disagree	Disagree	Disagree	Disagree	Rather agree	Rather agree	Rather agree	Neither agree or disagree	Strongly agree	Agree	Rather agree	Rather disagree	Agree	Rather agree	Agree	Rather agree	Neither agree or disagree	Agree	Rather disagree	Agree	Agree	Strongly agree	Neither agree or disagree	Rather disagree	Rather agree	Rather agree	Rather agree	Agree	Rather disagree	Rather agree	Agree
2018-10-24 16:57:56	Strongly disagree	Rather agree	Rather disagree	Agree	Strongly agree	Strongly agree	Agree	Rather agree	Rather disagree	Rather agree	Neither agree or disagree	Neither agree or disagree	Disagree	Strongly disagree	Strongly disagree	Disagree	Strongly disagree	Strongly disagree	Strongly disagree	Strongly disagree	Strongly disagree	Strongly disagree	Strongly disagree	Strongly disagree	Strongly disagree	Rather disagree	Rather agree	Rather agree	Rather agree	Disagree	Rather disagree	Agree	Rather agree	Strongly disagree	Rather agree	Rather agree	Rather agree	Rather disagree	Agree	Agree	Rather agree	Rather agree	Rather agree	Rather disagree	Strongly disagree	Disagree	Rather agree	Neither agree or disagree	Agree
2018-10-24 17:01:23	Strongly disagree	Strongly disagree	Strongly disagree	Rather disagree	Neither agree or disagree	Agree	Rather disagree	Rather disagree	Rather disagree	Agree	Disagree	Agree	Disagree	Disagree	Rather agree	Rather disagree	Agree	Agree	Rather agree	Rather disagree	Disagree	Disagree	Disagree	Rather disagree	Disagree	Disagree	Agree	Rather agree	Rather disagree	Rather agree	Agree	Rather disagree	Strongly agree	Agree	Rather disagree	Rather agree	Rather agree	Rather agree	Agree	Agree	Rather agree	Rather agree	Rather agree	Rather agree	Disagree	Rather agree	Rather disagree	Agree	Agree
2018-10-24 17:25:42	Strongly agree	Disagree	Strongly agree	Strongly agree	Strongly agree	Rather agree	Strongly agree	Rather agree	Rather agree	Strongly agree	Rather agree	Rather disagree	Disagree	Strongly disagree	Strongly disagree	Strongly disagree	Strongly disagree	Strongly disagree	Strongly disagree	Strongly disagree	Strongly disagree	Strongly disagree	Strongly disagree	Strongly disagree	Strongly disagree	Rather disagree	Neither agree or disagree	Rather agree	Rather agree	Rather agree	Rather disagree	Rather agree	Rather disagree	Disagree	Agree	Rather agree	Rather agree	Rather disagree	Agree	Rather agree	Agree	Rather disagree	Rather disagree	Agree	Rather disagree	Rather disagree	Rather agree	Agree	Neither agree or disagree
2018-10-24 17:32:54	Strongly disagree	Strongly disagree	Strongly disagree	Strongly disagree	Strongly disagree	Strongly disagree	Strongly disagree	Strongly disagree	Strongly disagree	Strongly disagree	Strongly disagree	Strongly disagree	Strongly disagree	Strongly disagree	Strongly disagree	Strongly disagree	Strongly disagree	Strongly disagree	Strongly disagree	Strongly disagree	Strongly disagree	Strongly disagree	Strongly disagree	Strongly disagree	Strongly disagree	Rather disagree	Agree	Neither agree or disagree	Disagree	Agree	Disagree	Strongly disagree	Neither agree or disagree	Rather agree	Rather disagree	Strongly agree	Rather disagree	Strongly agree	Rather disagree	Strongly agree	Rather disagree	Disagree	Agree	Agree	Rather agree	Strongly agree	Rather agree	Strongly agree	Neither agree or disagree
2018-10-24 17:40:19	Rather disagree	Neither agree or disagree	Rather disagree	Rather agree	Rather agree	Rather agree	Rather agree	Rather disagree	Rather disagree	Strongly disagree	Rather disagree	Neither agree or disagree	Neither agree or disagree	Neither agree or disagree	Neither agree or disagree	Neither agree or disagree	Neither agree or disagree	Strongly disagree	Strongly disagree	Strongly disagree	Strongly disagree	Strongly disagree	Rather disagree	Disagree	Disagree	Rather agree	Rather disagree	Rather agree	Rather agree	Rather disagree	Rather disagree	Rather agree	Rather disagree	Disagree	Rather agree	Rather disagree	Rather agree	Rather disagree	Rather agree	Disagree	Rather agree	Rather agree	Rather disagree	Disagree	Disagree	Rather disagree	Rather agree	Disagree	Rather agree
2018-10-24 17:42:08	Strongly disagree	Neither agree or disagree	Neither agree or disagree	Strongly agree	Rather disagree	Rather agree	Strongly agree	Strongly disagree	Strongly disagree	Strongly disagree	Neither agree or disagree	Rather agree	Neither agree or disagree	Neither agree or disagree	Neither agree or disagree	Rather agree	Strongly disagree	Strongly disagree	Strongly disagree	Strongly disagree	Strongly disagree	Strongly disagree	Neither agree or disagree	Neither agree or disagree	Neither agree or disagree	Strongly agree	Strongly disagree	Rather agree	Agree	Rather disagree	Strongly disagree	Strongly agree	Neither agree or disagree	Strongly disagree	Rather agree	Strongly disagree	Strongly agree	Strongly disagree	Strongly agree	Strongly disagree	Agree	Strongly agree	Strongly disagree	Strongly disagree	Strongly disagree	Strongly disagree	Rather agree	Rather disagree	Rather agree
2018-10-24 17:51:23	Neither agree or disagree	Neither agree or disagree	Neither agree or disagree	Neither agree or disagree	Rather disagree	Rather disagree	Neither agree or disagree	Rather disagree	Disagree	Rather disagree	Rather agree	Neither agree or disagree	Neither agree or disagree	Rather disagree	Neither agree or disagree	Disagree	Rather disagree	Rather disagree	Strongly disagree	Rather disagree	Neither agree or disagree	Neither agree or disagree	Neither agree or disagree	Neither agree or disagree	Neither agree or disagree	Rather agree	Strongly disagree	Agree	Strongly agree	Strongly disagree	Strongly disagree	Rather agree	Rather disagree	Strongly disagree	Agree	Rather disagree	Rather agree	Rather disagree	Rather agree	Disagree	Agree	Strongly agree	Rather disagree	Rather disagree	Disagree	Rather disagree	Agree	Strongly disagree	Agree
2018-10-24 17:51:53	Neither agree or disagree	Rather agree	Neither agree or disagree	Agree	Rather agree	Rather agree	Neither agree or disagree	Rather disagree	Disagree	Disagree	Rather agree	Agree	Rather agree	Disagree	Rather disagree	Rather disagree	Disagree	Rather disagree	Rather disagree	Rather agree	Rather disagree	Rather agree	Strongly agree	Neither agree or disagree	Rather disagree	Disagree	Agree	Rather disagree	Agree	Rather agree	Strongly disagree	Rather agree	Strongly agree	Neither agree or disagree	Rather disagree	Agree	Rather disagree	Neither agree or disagree	Rather agree	Neither agree or disagree	Disagree	Disagree	Rather agree	Neither agree or disagree	Disagree	Disagree	Strongly agree	Rather disagree	Rather disagree
2018-10-24 17:56:33	Rather disagree	Rather agree	Rather agree	Strongly agree	Strongly agree	Strongly agree	Strongly agree	Rather agree	Neither agree or disagree	Rather disagree	Agree	Agree	Agree	Strongly agree	Strongly agree	Strongly agree	Rather agree	Neither agree or disagree	Disagree	Disagree	Disagree	Disagree	Rather agree	Rather agree	Neither agree or disagree	Strongly agree	Strongly disagree	Strongly agree	Strongly agree	Strongly disagree	Disagree	Strongly agree	Strongly disagree	Strongly disagree	Strongly agree	Rather disagree	Rather agree	Disagree	Strongly agree	Disagree	Strongly agree	Strongly agree	Strongly disagree	Disagree	Strongly disagree	Strongly disagree	Strongly agree	Strongly disagree	Strongly agree
2018-10-24 18:53:57	Neither agree or disagree	Rather disagree	Neither agree or disagree	Disagree	Rather agree	Agree	Strongly agree	Disagree	Strongly disagree	Strongly disagree	Strongly disagree	Strongly disagree	Disagree	Neither agree or disagree	Rather disagree	Rather disagree	Strongly disagree	Strongly disagree	Strongly disagree	Strongly disagree	Strongly disagree	Strongly disagree	Disagree	Rather disagree	Disagree	Strongly agree	Rather disagree	Rather agree	Strongly agree	Rather disagree	Strongly disagree	Strongly agree	Strongly agree	Strongly disagree	Strongly agree	Rather agree	Strongly agree	Agree	Strongly agree	Rather agree	Strongly agree	Strongly agree	Strongly disagree	Rather disagree	Strongly disagree	Rather agree	Strongly agree	Rather disagree	Strongly agree
2018-10-24 20:02:44	Neither agree or disagree	Rather agree	Disagree	Strongly agree	Strongly agree	Strongly agree	Rather agree	Strongly disagree	Neither agree or disagree	Strongly disagree	Strongly agree	Strongly agree	Neither agree or disagree	Strongly disagree	Disagree	Neither agree or disagree	Strongly disagree	Strongly disagree	Strongly disagree	Strongly disagree	Strongly disagree	Strongly disagree	Rather disagree	Strongly agree	Rather disagree	Rather agree	Strongly agree	Strongly agree	Strongly agree	Rather disagree	Strongly agree	Rather disagree	Strongly agree	Rather disagree	Rather agree	Rather agree	Strongly agree	Strongly agree	Strongly agree	Strongly disagree	Rather agree	Strongly agree	Disagree	Strongly disagree	Strongly disagree	Rather disagree	Rather disagree	Strongly agree	Strongly agree
2018-10-24 20:18:16	Rather agree	Strongly agree	Rather agree	Strongly agree	Strongly agree	Strongly agree	Strongly agree	Rather disagree	Rather disagree	Rather disagree	Rather agree	Agree	Rather agree	Rather disagree	Rather disagree	Neither agree or disagree	Strongly disagree	Strongly disagree	Strongly disagree	Neither agree or disagree	Disagree	Strongly disagree	Neither agree or disagree	Neither agree or disagree	Neither agree or disagree	Rather agree	Rather disagree	Rather agree	Rather agree	Agree	Rather agree	Rather agree	Rather disagree	Neither agree or disagree	Rather agree	Rather agree	Agree	Rather disagree	Agree	Agree	Agree	Rather agree	Rather disagree	Rather agree	Rather disagree	Rather disagree	Rather disagree	Agree	Strongly agree
2018-10-24 20:33:43	Rather disagree	Rather agree	Strongly disagree	Rather agree	Neither agree or disagree	Strongly agree	Agree	Rather disagree	Agree	Neither agree or disagree	Disagree	Neither agree or disagree	Neither agree or disagree	Strongly disagree	Strongly disagree	Strongly disagree	Rather agree	Strongly disagree	Neither agree or disagree	Strongly disagree	Strongly disagree	Strongly disagree	Strongly disagree	Strongly disagree	Strongly disagree	Agree	Agree	Strongly agree	Strongly agree	Strongly disagree	Rather agree	Strongly agree	Rather disagree	Strongly disagree	Agree	Rather disagree	Strongly agree	Rather agree	Rather agree	Strongly disagree	Rather agree	Agree	Rather disagree	Strongly disagree	Strongly disagree	Rather disagree	Agree	Strongly disagree	Strongly agree
2018-10-24 20:55:00	Neither agree or disagree	Rather agree	Rather agree	Rather agree	Rather agree	Rather agree	Rather disagree	Disagree	Strongly disagree	Strongly disagree	Disagree	Rather agree	Neither agree or disagree	Neither agree or disagree	Neither agree or disagree	Neither agree or disagree	Disagree	Neither agree or disagree	Rather agree	Neither agree or disagree	Neither agree or disagree	Neither agree or disagree	Rather agree	Rather agree	Rather agree	Agree	Rather agree	Strongly agree	Strongly agree	Rather agree	Rather agree	Strongly agree	Neither agree or disagree	Strongly disagree	Strongly disagree	Rather agree	Rather agree	Strongly disagree	Agree	Rather agree	Rather agree	Strongly agree	Disagree	Disagree	Strongly disagree	Rather disagree	Agree	Disagree	Strongly agree
2018-10-24 21:00:26	Strongly disagree	Strongly disagree	Strongly disagree	Strongly disagree	Neither agree or disagree	Strongly disagree	Strongly disagree	Strongly disagree	Strongly disagree	Strongly disagree	Strongly disagree	Strongly disagree	Strongly disagree	Strongly disagree	Strongly disagree	Strongly disagree	Strongly disagree	Strongly disagree	Strongly disagree	Strongly disagree	Strongly disagree	Strongly disagree	Strongly disagree	Strongly disagree	Strongly disagree	Rather agree	Rather disagree	Rather agree	Rather agree	Disagree	Disagree	Rather agree	Strongly disagree	Strongly disagree	Agree	Rather agree	Agree	Neither agree or disagree	Agree	Rather agree	Rather agree	Rather agree	Disagree	Neither agree or disagree	Rather disagree	Rather agree	Rather agree	Agree	Agree
2018-10-24 21:31:11	Neither agree or disagree	Agree	Agree	Agree	Strongly agree	Strongly agree	Rather disagree	Neither agree or disagree	Agree	Agree	Disagree	Strongly disagree	Disagree	Strongly disagree	Rather agree	Rather disagree	Neither agree or disagree	Neither agree or disagree	Strongly disagree	Strongly disagree	Strongly disagree	Strongly disagree	Strongly disagree	Neither agree or disagree	Strongly disagree	Rather agree	Strongly agree	Rather agree	Rather disagree	Rather agree	Strongly agree	Rather agree	Strongly agree	Rather disagree	Rather agree	Rather agree	Strongly agree	Disagree	Rather agree	Strongly agree	Rather disagree	Rather agree	Rather disagree	Disagree	Disagree	Neither agree or disagree	Rather agree	Strongly agree	Strongly agree
2018-10-24 21:38:33	Rather disagree	Rather agree	Rather disagree	Agree	Agree	Agree	Rather disagree	Disagree	Rather disagree	Rather disagree	Neither agree or disagree	Rather disagree	Disagree	Strongly disagree	Rather agree	Rather disagree	Rather disagree	Rather agree	Rather disagree	Disagree	Disagree	Disagree	Disagree	Rather disagree	Rather disagree	Rather agree	Agree	Agree	Rather agree	Rather agree	Rather agree	Agree	Agree	Rather disagree	Rather agree	Rather agree	Rather agree	Agree	Rather disagree	Agree	Rather agree	Rather disagree	Rather agree	Rather agree	Rather disagree	Rather disagree	Rather agree	Agree	Agree
2018-10-24 21:43:27	Strongly disagree	Strongly disagree	Disagree	Disagree	Neither agree or disagree	Rather agree	Rather disagree	Strongly disagree	Strongly disagree	Strongly disagree	Strongly disagree	Strongly disagree	Strongly disagree	Strongly disagree	Rather agree	Rather agree	Neither agree or disagree	Strongly disagree	Rather agree	Strongly disagree	Strongly disagree	Neither agree or disagree	Neither agree or disagree	Neither agree or disagree	Neither agree or disagree	Rather disagree	Strongly agree	Rather agree	Rather agree	Rather agree	Strongly agree	Rather agree	Strongly agree	Rather agree	Rather disagree	Rather agree	Agree	Rather disagree	Rather agree	Rather agree	Rather disagree	Rather disagree	Rather agree	Neither agree or disagree	Disagree	Disagree	Rather disagree	Agree	Agree
2018-10-24 21:44:01	Rather disagree	Neither agree or disagree	Rather disagree	Agree	Agree	Strongly agree	Rather disagree	Rather disagree	Disagree	Strongly disagree	Rather agree	Rather agree	Rather agree	Agree	Rather agree	Rather agree	Neither agree or disagree	Disagree	Strongly disagree	Disagree	Rather disagree	Disagree	Neither agree or disagree	Rather disagree	Neither agree or disagree	Rather agree	Rather disagree	Agree	Agree	Rather disagree	Rather agree	Strongly agree	Rather disagree	Strongly disagree	Agree	Neither agree or disagree	Rather agree	Rather disagree	Agree	Rather agree	Neither agree or disagree	Rather agree	Rather agree	Rather disagree	Disagree	Rather agree	Rather agree	Rather disagree	Agree
2018-10-24 21:46:10	Neither agree or disagree	Rather agree	Neither agree or disagree	Rather disagree	Agree	Agree	Neither agree or disagree	Rather disagree	Disagree	Disagree	Rather disagree	Neither agree or disagree	Disagree	Disagree	Disagree	Disagree	Strongly disagree	Strongly disagree	Strongly disagree	Strongly disagree	Strongly disagree	Strongly disagree	Strongly disagree	Strongly disagree	Strongly disagree	Agree	Rather agree	Agree	Agree	Disagree	Rather disagree	Agree	Rather disagree	Strongly disagree	Rather agree	Disagree	Disagree	Disagree	Rather agree	Rather disagree	Agree	Rather agree	Strongly disagree	Rather disagree	Strongly disagree	Disagree	Rather agree	Rather agree	Agree
2018-10-24 21:46:20	Rather disagree	Rather agree	Neither agree or disagree	Strongly agree	Strongly agree	Strongly agree	Strongly agree	Disagree	Rather disagree	Rather disagree	Disagree	Rather disagree	Strongly disagree	Disagree	Disagree	Disagree	Disagree	Disagree	Disagree	Disagree	Disagree	Disagree	Disagree	Disagree	Disagree	Strongly agree	Rather disagree	Strongly agree	Strongly agree	Rather disagree	Rather disagree	Strongly agree	Agree	Disagree	Strongly agree	Rather disagree	Agree	Rather agree	Strongly agree	Agree	Rather agree	Strongly agree	Disagree	Disagree	Strongly disagree	Strongly disagree	Strongly agree	Rather agree	Strongly agree
2018-10-24 21:51:53	Agree	Agree	Rather agree	Agree	Strongly agree	Strongly agree	Agree	Rather agree	Rather agree	Rather agree	Rather disagree	Agree	Agree	Rather disagree	Agree	Rather disagree	Rather agree	Rather agree	Disagree	Disagree	Disagree	Disagree	Disagree	Disagree	Disagree	Rather agree	Rather agree	Rather agree	Agree	Rather disagree	Agree	Rather agree	Agree	Strongly disagree	Rather agree	Agree	Rather disagree	Rather disagree	Rather disagree	Strongly agree	Rather disagree	Rather disagree	Disagree	Rather disagree	Disagree	Agree	Rather disagree	Agree	Rather agree
2018-10-24 21:53:07	Neither agree or disagree	Rather disagree	Strongly disagree	Agree	Rather agree	Agree	Agree	Rather disagree	Rather agree	Strongly disagree	Rather disagree	Rather disagree	Rather disagree	Neither agree or disagree	Neither agree or disagree	Neither agree or disagree	Neither agree or disagree	Rather disagree	Rather disagree	Neither agree or disagree	Neither agree or disagree	Neither agree or disagree	Neither agree or disagree	Neither agree or disagree	Neither agree or disagree	Rather agree	Rather disagree	Rather agree	Rather agree	Rather disagree	Rather disagree	Agree	Rather agree	Rather disagree	Agree	Rather disagree	Rather agree	Neither agree or disagree	Agree	Rather disagree	Rather agree	Rather agree	Rather agree	Rather disagree	Rather disagree	Rather disagree	Agree	Rather agree	Agree
2018-10-24 21:54:17	Strongly disagree	Strongly disagree	Disagree	Rather disagree	Neither agree or disagree	Neither agree or disagree	Rather disagree	Rather agree	Rather disagree	Strongly disagree	Neither agree or disagree	Disagree	Strongly disagree	Neither agree or disagree	Neither agree or disagree	Rather agree	Rather agree	Rather disagree	Neither agree or disagree	Neither agree or disagree	Neither agree or disagree	Neither agree or disagree	Rather agree	Neither agree or disagree	Rather agree	Rather agree	Rather agree	Agree	Strongly agree	Strongly disagree	Rather disagree	Strongly agree	Rather disagree	Strongly disagree	Neither agree or disagree	Rather agree	Strongly agree	Rather disagree	Rather agree	Rather agree	Rather agree	Strongly agree	Rather disagree	Rather disagree	Rather disagree	Disagree	Rather agree	Rather agree	Strongly agree
2018-10-24 21:55:50	Disagree	Disagree	Rather disagree	Rather agree	Rather agree	Agree	Disagree	Rather disagree	Rather disagree	Neither agree or disagree	Strongly disagree	Disagree	Disagree	Disagree	Disagree	Disagree	Strongly disagree	Strongly disagree	Strongly disagree	Strongly disagree	Strongly disagree	Strongly disagree	Disagree	Disagree	Disagree	Agree	Rather agree	Agree	Agree	Disagree	Rather agree	Agree	Neither agree or disagree	Strongly disagree	Agree	Neither agree or disagree	Agree	Rather disagree	Agree	Rather agree	Rather agree	Agree	Agree	Neither agree or disagree	Strongly disagree	Rather disagree	Rather disagree	Rather agree	Strongly agree
2018-10-24 21:57:23	Strongly disagree	Strongly disagree	Strongly disagree	Strongly disagree	Strongly disagree	Strongly disagree	Strongly disagree	Strongly disagree	Strongly disagree	Strongly disagree	Strongly disagree	Strongly disagree	Strongly disagree	Strongly disagree	Strongly disagree	Strongly disagree	Strongly disagree	Strongly disagree	Strongly disagree	Strongly disagree	Strongly disagree	Strongly disagree	Strongly disagree	Strongly disagree	Strongly disagree	Rather agree	Rather agree	Strongly agree	Strongly agree	Rather disagree	Rather agree	Rather agree	Rather agree	Rather disagree	Rather agree	Rather agree	Rather agree	Rather agree	Rather agree	Rather agree	Agree	Rather agree	Rather disagree	Rather agree	Rather disagree	Rather disagree	Agree	Rather agree	Strongly agree
2018-10-24 21:57:32	Agree	Agree	Strongly agree	Neither agree or disagree	Rather agree	Strongly agree	Neither agree or disagree	Strongly disagree	Rather disagree	Strongly disagree	Rather disagree	Rather agree	Neither agree or disagree	Disagree	Agree	Rather disagree	Disagree	Neither agree or disagree	Disagree	Disagree	Rather disagree	Rather disagree	Neither agree or disagree	Rather disagree	Neither agree or disagree	Agree	Rather disagree	Strongly agree	Strongly agree	Strongly disagree	Disagree	Strongly agree	Strongly agree	Strongly disagree	Rather agree	Rather disagree	Strongly agree	Rather disagree	Rather disagree	Agree	Rather agree	Rather agree	Rather agree	Rather disagree	Rather disagree	Rather agree	Rather disagree	Rather disagree	Strongly agree
2018-10-24 21:57:39	Strongly disagree	Strongly disagree	Strongly disagree	Strongly disagree	Rather agree	Rather agree	Rather disagree	Rather agree	Disagree	Strongly disagree	Strongly disagree	Strongly disagree	Strongly disagree	Strongly disagree	Strongly disagree	Strongly disagree	Strongly disagree	Strongly disagree	Strongly disagree	Strongly disagree	Strongly disagree	Strongly disagree	Strongly disagree	Strongly disagree	Strongly disagree	Rather agree	Rather agree	Agree	Agree	Rather disagree	Rather agree	Agree	Agree	Strongly disagree	Rather agree	Neither agree or disagree	Agree	Strongly disagree	Rather agree	Strongly agree	Agree	Neither agree or disagree	Disagree	Agree	Strongly disagree	Rather agree	Rather agree	Rather agree	Rather agree
2018-10-24 22:01:15	Rather agree	Rather disagree	Neither agree or disagree	Rather agree	Rather agree	Rather agree	Rather agree	Rather disagree	Rather disagree	Rather disagree	Rather disagree	Rather agree	Rather disagree	Neither agree or disagree	Neither agree or disagree	Neither agree or disagree	Neither agree or disagree	Neither agree or disagree	Neither agree or disagree	Neither agree or disagree	Neither agree or disagree	Neither agree or disagree	Neither agree or disagree	Rather agree	Neither agree or disagree	Rather agree	Rather agree	Rather agree	Rather agree	Rather disagree	Rather agree	Rather agree	Rather agree	Rather disagree	Rather agree	Rather disagree	Rather agree	Rather disagree	Rather agree	Rather agree	Rather agree	Rather disagree	Rather agree	Rather disagree	Disagree	Rather agree	Rather agree	Rather agree	Rather agree
2018-10-24 22:02:46	Neither agree or disagree	Neither agree or disagree	Neither agree or disagree	Neither agree or disagree	Neither agree or disagree	Neither agree or disagree	Neither agree or disagree	Neither agree or disagree	Neither agree or disagree	Neither agree or disagree	Neither agree or disagree	Neither agree or disagree	Neither agree or disagree	Neither agree or disagree	Neither agree or disagree	Neither agree or disagree	Neither agree or disagree	Neither agree or disagree	Neither agree or disagree	Neither agree or disagree	Neither agree or disagree	Neither agree or disagree	Rather agree	Neither agree or disagree	Neither agree or disagree	Rather agree	Rather disagree	Rather agree	Rather agree	Rather disagree	Rather disagree	Agree	Rather disagree	Disagree	Rather agree	Rather disagree	Agree	Rather disagree	Rather agree	Rather disagree	Rather agree	Rather agree	Rather disagree	Rather disagree	Rather disagree	Neither agree or disagree	Rather agree	Neither agree or disagree	Agree
2018-10-24 22:03:26	Strongly disagree	Strongly disagree	Strongly disagree	Strongly disagree	Strongly disagree	Strongly disagree	Strongly disagree	Strongly disagree	Strongly disagree	Strongly disagree	Strongly disagree	Strongly disagree	Strongly disagree	Strongly disagree	Strongly disagree	Strongly disagree	Strongly disagree	Strongly disagree	Strongly disagree	Strongly disagree	Strongly disagree	Strongly disagree	Strongly disagree	Strongly disagree	Strongly disagree	Rather agree	Strongly agree	Rather agree	Rather agree	Rather agree	Strongly agree	Rather agree	Strongly agree	Rather disagree	Rather agree	Strongly agree	Rather agree	Agree	Rather disagree	Strongly agree	Rather disagree	Rather agree	Rather disagree	Strongly agree	Rather agree	Strongly agree	Rather agree	Strongly agree	Rather agree
2018-10-24 22:07:50	Agree	Rather agree	Rather agree	Strongly agree	Rather agree	Rather agree	Rather agree	Rather disagree	Rather disagree	Strongly disagree	Neither agree or disagree	Neither agree or disagree	Rather disagree	Neither agree or disagree	Neither agree or disagree	Neither agree or disagree	Strongly disagree	Strongly disagree	Strongly disagree	Strongly disagree	Strongly disagree	Strongly disagree	Neither agree or disagree	Neither agree or disagree	Neither agree or disagree	Strongly agree	Disagree	Strongly agree	Strongly agree	Disagree	Rather disagree	Strongly agree	Rather agree	Strongly disagree	Strongly agree	Disagree	Strongly agree	Strongly disagree	Rather agree	Disagree	Strongly agree	Agree	Rather disagree	Disagree	Strongly disagree	Neither agree or disagree	Rather agree	Rather agree	Strongly agree
2018-10-24 22:08:00	Rather disagree	Rather agree	Strongly disagree	Agree	Strongly agree	Strongly agree	Rather agree	Agree	Agree	Disagree	Rather disagree	Rather agree	Neither agree or disagree	Strongly disagree	Strongly disagree	Strongly disagree	Strongly disagree	Strongly disagree	Strongly disagree	Strongly disagree	Strongly disagree	Strongly disagree	Strongly disagree	Strongly disagree	Strongly disagree	Rather agree	Agree	Strongly agree	Agree	Strongly disagree	Strongly agree	Strongly agree	Strongly disagree	Strongly disagree	Agree	Agree	Agree	Rather disagree	Strongly agree	Strongly agree	Neither agree or disagree	Rather disagree	Rather disagree	Rather disagree	Strongly disagree	Agree	Rather agree	Rather agree	Agree
2018-10-24 22:14:56	Strongly disagree	Strongly disagree	Disagree	Rather disagree	Rather agree	Rather agree	Rather disagree	Strongly disagree	Disagree	Neither agree or disagree	Neither agree or disagree	Rather agree	Disagree	Strongly disagree	Neither agree or disagree	Neither agree or disagree	Disagree	Neither agree or disagree	Strongly disagree	Disagree	Disagree	Strongly disagree	Strongly disagree	Neither agree or disagree	Neither agree or disagree	Rather agree	Strongly disagree	Rather agree	Rather agree	Rather agree	Strongly disagree	Strongly agree	Rather agree	Strongly disagree	Rather agree	Neither agree or disagree	Rather agree	Neither agree or disagree	Rather agree	Agree	Neither agree or disagree	Agree	Agree	Rather disagree	Disagree	Rather agree	Agree	Disagree	Strongly agree
2018-10-24 22:17:28	Disagree	Disagree	Disagree	Disagree	Neither agree or disagree	Rather agree	Rather disagree	Rather disagree	Disagree	Disagree	Rather disagree	Rather disagree	Disagree	Disagree	Neither agree or disagree	Neither agree or disagree	Disagree	Disagree	Disagree	Disagree	Disagree	Disagree	Neither agree or disagree	Neither agree or disagree	Neither agree or disagree	Neither agree or disagree	Neither agree or disagree	Rather agree	Neither agree or disagree	Neither agree or disagree	Rather disagree	Neither agree or disagree	Rather disagree	Rather disagree	Rather agree	Rather disagree	Rather agree	Rather disagree	Rather agree	Neither agree or disagree	Rather agree	Rather agree	Rather disagree	Rather disagree	Rather disagree	Rather disagree	Neither agree or disagree	Rather disagree	Rather agree
2018-10-24 22:22:02	Disagree	Neither agree or disagree	Neither agree or disagree	Rather agree	Agree	Agree	Rather agree	Rather disagree	Rather agree	Disagree	Neither agree or disagree	Rather agree	Rather agree	Neither agree or disagree	Neither agree or disagree	Neither agree or disagree	Strongly disagree	Strongly disagree	Strongly disagree	Rather disagree	Rather disagree	Rather disagree	Neither agree or disagree	Neither agree or disagree	Neither agree or disagree	Rather agree	Rather disagree	Rather agree	Agree	Rather disagree	Rather disagree	Rather agree	Agree	Rather disagree	Rather agree	Rather disagree	Agree	Rather disagree	Rather agree	Rather agree	Neither agree or disagree	Rather disagree	Disagree	Rather disagree	Neither agree or disagree	Rather disagree	Rather disagree	Disagree	Agree
2018-10-24 22:22:57	Rather disagree	Neither agree or disagree	Strongly disagree	Strongly agree	Strongly agree	Strongly agree	Strongly agree	Rather agree	Agree	Rather disagree	Disagree	Disagree	Strongly disagree	Neither agree or disagree	Neither agree or disagree	Neither agree or disagree	Strongly disagree	Strongly disagree	Strongly disagree	Strongly disagree	Strongly disagree	Strongly disagree	Strongly disagree	Strongly disagree	Strongly disagree	Rather agree	Rather disagree	Rather agree	Rather agree	Rather disagree	Rather agree	Agree	Rather disagree	Strongly disagree	Rather agree	Rather disagree	Agree	Disagree	Agree	Agree	Agree	Rather agree	Rather disagree	Disagree	Strongly disagree	Rather agree	Neither agree or disagree	Strongly disagree	Strongly agree
2018-10-24 22:23:00	Strongly disagree	Strongly disagree	Neither agree or disagree	Strongly disagree	Strongly agree	Strongly disagree	Strongly disagree	Strongly disagree	Strongly disagree	Strongly disagree	Rather disagree	Rather agree	Strongly disagree	Strongly disagree	Neither agree or disagree	Rather disagree	Rather agree	Neither agree or disagree	Agree	Disagree	Neither agree or disagree	Rather disagree	Neither agree or disagree	Neither agree or disagree	Disagree	Strongly disagree	Rather disagree	Neither agree or disagree	Strongly disagree	Rather disagree	Agree	Agree	Rather agree	Disagree	Strongly disagree	Agree	Strongly agree	Neither agree or disagree	Neither agree or disagree	Strongly agree	Rather agree	Rather disagree	Strongly agree	Strongly disagree	Rather disagree	Rather disagree	Rather agree	Rather agree	Rather disagree
2018-10-24 22:25:45	Neither agree or disagree	Agree	Neither agree or disagree	Neither agree or disagree	Strongly agree	Agree	Agree	Rather agree	Rather agree	Rather disagree	Neither agree or disagree	Neither agree or disagree	Neither agree or disagree	Neither agree or disagree	Rather disagree	Rather agree	Strongly disagree	Rather disagree	Strongly disagree	Strongly disagree	Strongly disagree	Strongly disagree	Rather disagree	Disagree	Strongly disagree	Rather disagree	Agree	Rather agree	Rather agree	Rather agree	Strongly agree	Rather disagree	Strongly agree	Rather agree	Rather disagree	Agree	Rather agree	Strongly agree	Rather agree	Rather agree	Neither agree or disagree	Rather disagree	Strongly agree	Strongly agree	Rather disagree	Agree	Rather disagree	Agree	Rather agree
2018-10-24 22:28:33	Disagree	Neither agree or disagree	Rather disagree	Rather agree	Rather agree	Rather agree	Neither agree or disagree	Rather disagree	Neither agree or disagree	Rather disagree	Disagree	Strongly disagree	Strongly disagree	Strongly disagree	Rather agree	Strongly disagree	Neither agree or disagree	Disagree	Disagree	Disagree	Disagree	Disagree	Disagree	Disagree	Disagree	Rather disagree	Strongly agree	Rather disagree	Rather agree	Agree	Agree	Rather agree	Strongly agree	Neither agree or disagree	Rather disagree	Agree	Rather agree	Rather agree	Rather agree	Strongly agree	Rather agree	Rather disagree	Rather disagree	Rather agree	Rather agree	Rather agree	Rather agree	Neither agree or disagree	Rather agree
2018-10-24 22:29:47	Rather disagree	Rather agree	Neither agree or disagree	Agree	Agree	Agree	Agree	Rather agree	Rather agree	Rather agree	Rather agree	Agree	Rather agree	Rather disagree	Rather agree	Rather agree	Rather disagree	Rather disagree	Disagree	Disagree	Disagree	Disagree	Rather agree	Neither agree or disagree	Neither agree or disagree	Rather agree	Disagree	Agree	Rather agree	Rather disagree	Neither agree or disagree	Agree	Rather disagree	Disagree	Rather agree	Rather agree	Rather agree	Rather disagree	Rather agree	Rather disagree	Rather agree	Neither agree or disagree	Neither agree or disagree	Rather agree	Rather disagree	Rather disagree	Agree	Disagree	Rather agree
2018-10-24 22:44:28	Agree	Rather agree	Neither agree or disagree	Strongly agree	Rather agree	Rather disagree	Rather agree	Rather agree	Strongly agree	Strongly agree	Rather agree	Rather agree	Neither agree or disagree	Neither agree or disagree	Neither agree or disagree	Neither agree or disagree	Neither agree or disagree	Neither agree or disagree	Neither agree or disagree	Neither agree or disagree	Neither agree or disagree	Neither agree or disagree	Neither agree or disagree	Neither agree or disagree	Strongly disagree	Rather agree	Agree	Agree	Rather agree	Rather agree	Strongly agree	Rather agree	Strongly agree	Rather agree	Rather disagree	Strongly agree	Rather agree	Strongly agree	Agree	Agree	Rather agree	Strongly disagree	Disagree	Agree	Strongly agree	Agree	Rather disagree	Agree	Rather disagree
2018-10-24 22:50:18	Strongly disagree	Strongly disagree	Strongly disagree	Strongly disagree	Strongly disagree	Strongly disagree	Strongly disagree	Strongly disagree	Strongly disagree	Strongly disagree	Strongly disagree	Strongly disagree	Strongly disagree	Strongly disagree	Strongly disagree	Strongly disagree	Strongly disagree	Strongly disagree	Strongly disagree	Strongly disagree	Strongly disagree	Strongly disagree	Strongly disagree	Strongly disagree	Strongly disagree	Agree	Rather disagree	Agree	Agree	Disagree	Rather disagree	Agree	Agree	Strongly disagree	Rather agree	Rather disagree	Agree	Disagree	Agree	Rather disagree	Rather agree	Agree	Rather disagree	Disagree	Rather disagree	Rather disagree	Rather agree	Disagree	Rather agree
2018-10-24 23:06:13	Strongly disagree	Strongly disagree	Strongly disagree	Strongly disagree	Strongly disagree	Strongly disagree	Strongly disagree	Strongly disagree	Strongly disagree	Strongly disagree	Strongly disagree	Strongly disagree	Strongly disagree	Strongly disagree	Strongly disagree	Strongly disagree	Strongly disagree	Strongly disagree	Strongly disagree	Strongly disagree	Strongly disagree	Strongly disagree	Strongly disagree	Strongly disagree	Strongly disagree	Rather agree	Rather agree	Rather agree	Rather agree	Rather disagree	Rather agree	Rather agree	Rather agree	Disagree	Agree	Strongly agree	Agree	Agree	Rather agree	Agree	Rather agree	Neither agree or disagree	Rather disagree	Rather agree	Neither agree or disagree	Neither agree or disagree	Neither agree or disagree	Rather agree	Neither agree or disagree
2018-10-24 23:08:25	Neither agree or disagree	Rather disagree	Rather agree	Neither agree or disagree	Agree	Agree	Rather disagree	Disagree	Strongly agree	Disagree	Rather disagree	Rather agree	Rather agree	Rather agree	Rather agree	Rather agree	Rather agree	Agree	Rather agree	Disagree	Disagree	Disagree	Rather agree	Rather disagree	Rather agree	Disagree	Agree	Rather agree	Rather agree	Agree	Strongly agree	Rather disagree	Strongly agree	Agree	Disagree	Strongly agree	Neither agree or disagree	Rather agree	Rather disagree	Strongly agree	Rather disagree	Disagree	Strongly disagree	Rather disagree	Rather agree	Neither agree or disagree	Disagree	Rather agree	Rather agree
2018-10-24 23:18:49	Strongly disagree	Neither agree or disagree	Neither agree or disagree	Strongly agree	Rather agree	Strongly agree	Strongly agree	Rather agree	Rather disagree	Rather agree	Disagree	Neither agree or disagree	Strongly disagree	Strongly disagree	Rather disagree	Neither agree or disagree	Strongly disagree	Strongly disagree	Strongly disagree	Strongly disagree	Strongly disagree	Strongly disagree	Strongly disagree	Strongly disagree	Strongly disagree	Rather disagree	Agree	Agree	Rather agree	Disagree	Rather agree	Agree	Strongly agree	Strongly disagree	Rather agree	Agree	Agree	Strongly agree	Agree	Agree	Rather agree	Disagree	Neither agree or disagree	Strongly agree	Rather disagree	Rather agree	Neither agree or disagree	Rather agree	Agree
2018-10-24 23:22:43	Strongly disagree	Disagree	Strongly disagree	Strongly disagree	Rather disagree	Disagree	Strongly disagree	Disagree	Strongly disagree	Strongly disagree	Neither agree or disagree	Disagree	Strongly disagree	Strongly disagree	Disagree	Neither agree or disagree	Neither agree or disagree	Neither agree or disagree	Strongly disagree	Disagree	Neither agree or disagree	Neither agree or disagree	Rather disagree	Neither agree or disagree	Neither agree or disagree	Rather agree	Rather disagree	Agree	Rather disagree	Rather disagree	Rather disagree	Rather agree	Rather disagree	Strongly disagree	Rather agree	Rather agree	Strongly agree	Disagree	Rather agree	Agree	Agree	Rather disagree	Rather agree	Neither agree or disagree	Strongly disagree	Rather disagree	Rather agree	Rather agree	Agree
2018-10-24 23:35:39	Neither agree or disagree	Strongly disagree	Strongly disagree	Agree	Rather agree	Agree	Rather agree	Strongly disagree	Rather agree	Strongly disagree	Disagree	Agree	Neither agree or disagree	Rather agree	Rather agree	Rather agree	Neither agree or disagree	Neither agree or disagree	Strongly disagree	Strongly disagree	Strongly disagree	Strongly disagree	Neither agree or disagree	Strongly disagree	Strongly disagree	Rather disagree	Agree	Rather agree	Rather agree	Rather agree	Rather agree	Rather agree	Rather agree	Rather disagree	Rather disagree	Agree	Rather agree	Disagree	Disagree	Agree	Rather agree	Rather agree	Neither agree or disagree	Rather disagree	Disagree	Strongly disagree	Rather disagree	Rather agree	Agree
2018-10-25 00:07:38	Rather agree	Rather disagree	Strongly disagree	Rather agree	Strongly agree	Rather agree	Neither agree or disagree	Rather disagree	Rather agree	Rather disagree	Agree	Strongly agree	Rather disagree	Rather agree	Strongly disagree	Strongly disagree	Rather agree	Strongly disagree	Strongly disagree	Strongly disagree	Strongly disagree	Strongly disagree	Strongly disagree	Strongly disagree	Strongly disagree	Rather agree	Disagree	Strongly disagree	Disagree	Agree	Neither agree or disagree	Disagree	Neither agree or disagree	Disagree	Strongly agree	Strongly agree	Strongly agree	Disagree	Rather disagree	Rather agree	Agree	Rather disagree	Agree	Rather disagree	Strongly agree	Agree	Agree	Rather agree	Agree
2018-10-25 07:34:10	Neither agree or disagree	Rather agree	Neither agree or disagree	Agree	Agree	Agree	Rather agree	Neither agree or disagree	Agree	Rather agree	Neither agree or disagree	Rather agree	Neither agree or disagree	Rather agree	Rather agree	Neither agree or disagree	Rather agree	Rather disagree	Strongly disagree	Disagree	Strongly disagree	Strongly disagree	Neither agree or disagree	Neither agree or disagree	Neither agree or disagree	Neither agree or disagree	Rather agree	Rather agree	Rather agree	Rather agree	Rather agree	Rather agree	Rather agree	Rather disagree	Neither agree or disagree	Rather agree	Rather agree	Rather agree	Rather agree	Rather agree	Neither agree or disagree	Neither agree or disagree	Rather disagree	Agree	Rather disagree	Rather agree	Rather disagree	Neither agree or disagree	Rather agree
2018-10-25 08:28:42	Rather disagree	Agree	Neither agree or disagree	Strongly agree	Agree	Agree	Agree	Disagree	Rather agree	Rather disagree	Neither agree or disagree	Rather agree	Disagree	Neither agree or disagree	Neither agree or disagree	Disagree	Strongly disagree	Strongly disagree	Strongly disagree	Strongly disagree	Neither agree or disagree	Neither agree or disagree	Strongly disagree	Disagree	Strongly disagree	Rather agree	Rather agree	Strongly agree	Rather agree	Disagree	Rather disagree	Agree	Rather agree	Strongly disagree	Rather disagree	Rather agree	Agree	Rather disagree	Rather agree	Strongly agree	Rather agree	Disagree	Rather disagree	Rather disagree	Rather agree	Disagree	Agree	Disagree	Strongly agree
2018-10-25 09:44:09	Rather disagree	Neither agree or disagree	Neither agree or disagree	Rather disagree	Rather agree	Rather agree	Neither agree or disagree	Rather agree	Rather disagree	Rather disagree	Rather disagree	Neither agree or disagree	Disagree	Neither agree or disagree	Rather agree	Strongly disagree	Neither agree or disagree	Neither agree or disagree	Strongly disagree	Neither agree or disagree	Neither agree or disagree	Neither agree or disagree	Disagree	Neither agree or disagree	Neither agree or disagree	Rather disagree	Rather agree	Rather agree	Neither agree or disagree	Rather disagree	Rather agree	Rather agree	Rather agree	Rather agree	Rather disagree	Rather agree	Rather agree	Rather agree	Rather agree	Rather agree	Rather agree	Rather disagree	Rather agree	Rather agree	Rather agree	Rather agree	Rather agree	Rather disagree	Rather agree
2018-10-25 10:43:45	Rather disagree	Strongly disagree	Strongly disagree	Agree	Rather disagree	Rather agree	Rather disagree	Rather disagree	Disagree	Disagree	Strongly disagree	Disagree	Strongly disagree	Rather disagree	Rather agree	Disagree	Rather agree	Neither agree or disagree	Disagree	Disagree	Disagree	Disagree	Disagree	Disagree	Rather disagree	Rather disagree	Rather disagree	Rather agree	Rather agree	Rather agree	Neither agree or disagree	Rather agree	Rather agree	Rather agree	Rather disagree	Rather agree	Rather agree	Neither agree or disagree	Rather disagree	Agree	Rather disagree	Rather disagree	Neither agree or disagree	Rather agree	Rather agree	Rather agree	Rather disagree	Rather disagree	Agree
2018-10-25 10:47:33	Disagree	Strongly agree	Disagree	Strongly agree	Strongly agree	Strongly agree	Neither agree or disagree	Rather agree	Strongly disagree	Strongly disagree	Disagree	Disagree	Strongly disagree	Rather disagree	Rather agree	Agree	Strongly disagree	Strongly disagree	Strongly disagree	Strongly disagree	Strongly disagree	Strongly disagree	Neither agree or disagree	Strongly disagree	Neither agree or disagree	Strongly agree	Rather agree	Agree	Agree	Disagree	Strongly disagree	Rather agree	Disagree	Strongly disagree	Strongly agree	Rather agree	Rather agree	Rather disagree	Rather agree	Disagree	Neither agree or disagree	Agree	Rather disagree	Rather disagree	Disagree	Rather disagree	Rather agree	Strongly disagree	Strongly agree
2018-10-25 10:57:16	Strongly disagree	Neither agree or disagree	Rather agree	Agree	Strongly agree	Strongly agree	Rather agree	Rather disagree	Disagree	Disagree	Rather agree	Rather agree	Neither agree or disagree	Neither agree or disagree	Neither agree or disagree	Neither agree or disagree	Neither agree or disagree	Neither agree or disagree	Neither agree or disagree	Neither agree or disagree	Neither agree or disagree	Neither agree or disagree	Neither agree or disagree	Neither agree or disagree	Neither agree or disagree	Agree	Rather disagree	Strongly agree	Strongly agree	Rather disagree	Rather disagree	Agree	Strongly disagree	Strongly disagree	Agree	Disagree	Agree	Rather agree	Agree	Rather agree	Agree	Agree	Rather disagree	Neither agree or disagree	Strongly disagree	Disagree	Rather agree	Disagree	Strongly agree
2018-10-25 10:59:31	Rather agree	Strongly agree	Rather disagree	Strongly agree	Strongly agree	Agree	Rather agree	Disagree	Neither agree or disagree	Rather disagree	Disagree	Rather agree	Strongly disagree	Disagree	Disagree	Strongly disagree	Strongly disagree	Strongly disagree	Strongly disagree	Strongly disagree	Strongly disagree	Disagree	Disagree	Disagree	Strongly disagree	Strongly agree	Disagree	Agree	Strongly agree	Disagree	Disagree	Strongly agree	Disagree	Disagree	Agree	Disagree	Strongly agree	Disagree	Strongly agree	Disagree	Strongly agree	Strongly agree	Disagree	Rather agree	Strongly disagree	Disagree	Strongly agree	Rather agree	Agree
2018-10-25 11:01:27	Rather disagree	Strongly agree	Agree	Agree	Strongly agree	Strongly agree	Agree	Agree	Neither agree or disagree	Disagree	Rather agree	Rather agree	Agree	Agree	Agree	Agree	Neither agree or disagree	Neither agree or disagree	Neither agree or disagree	Disagree	Disagree	Disagree	Agree	Agree	Agree	Rather agree	Rather agree	Agree	Agree	Neither agree or disagree	Rather agree	Agree	Neither agree or disagree	Rather disagree	Rather agree	Rather agree	Agree	Neither agree or disagree	Rather agree	Rather disagree	Rather agree	Rather agree	Rather disagree	Rather disagree	Strongly disagree	Neither agree or disagree	Rather agree	Rather agree	Agree
2018-10-25 11:10:04	Agree	Strongly agree	Rather agree	Strongly agree	Agree	Agree	Agree	Rather disagree	Strongly agree	Agree	Disagree	Neither agree or disagree	Neither agree or disagree	Neither agree or disagree	Neither agree or disagree	Neither agree or disagree	Agree	Rather agree	Rather agree	Neither agree or disagree	Neither agree or disagree	Disagree	Neither agree or disagree	Rather agree	Neither agree or disagree	Rather agree	Agree	Rather agree	Rather disagree	Rather disagree	Rather agree	Rather agree	Strongly agree	Rather agree	Rather disagree	Agree	Rather agree	Rather agree	Rather agree	Agree	Rather disagree	Rather disagree	Strongly agree	Agree	Agree	Agree	Rather disagree	Strongly agree	Agree
2018-10-25 11:42:27	Strongly agree	Agree	Rather disagree	Strongly agree	Neither agree or disagree	Strongly agree	Strongly agree	Strongly disagree	Strongly disagree	Strongly disagree	Neither agree or disagree	Strongly agree	Neither agree or disagree	Neither agree or disagree	Strongly agree	Strongly agree	Rather disagree	Rather disagree	Rather disagree	Rather agree	Strongly disagree	Strongly disagree	Strongly agree	Strongly agree	Strongly agree	Strongly agree	Strongly disagree	Strongly agree	Neither agree or disagree	Rather agree	Rather agree	Strongly agree	Strongly agree	Strongly disagree	Strongly agree	Strongly agree	Neither agree or disagree	Strongly disagree	Strongly agree	Strongly agree	Strongly agree	Strongly disagree	Strongly disagree	Strongly agree	Strongly disagree	Strongly disagree	Strongly agree	Strongly agree	Strongly agree
2018-10-25 11:49:50	Strongly disagree	Strongly disagree	Strongly disagree	Strongly disagree	Rather agree	Rather agree	Strongly disagree	Strongly disagree	Strongly disagree	Strongly disagree	Strongly disagree	Strongly disagree	Strongly disagree	Strongly disagree	Strongly disagree	Strongly disagree	Strongly disagree	Strongly disagree	Strongly disagree	Strongly disagree	Strongly disagree	Strongly disagree	Strongly disagree	Strongly disagree	Strongly disagree	Rather disagree	Rather agree	Rather agree	Rather agree	Rather disagree	Rather agree	Rather agree	Rather disagree	Rather disagree	Rather agree	Agree	Rather agree	Strongly agree	Rather disagree	Rather agree	Rather disagree	Rather disagree	Rather agree	Rather agree	Strongly disagree	Rather agree	Rather disagree	Agree	Rather disagree
2018-10-25 11:55:06	Strongly agree	Strongly agree	Neither agree or disagree	Strongly agree	Strongly agree	Strongly agree	Neither agree or disagree	Strongly disagree	Strongly disagree	Strongly disagree	Strongly agree	Neither agree or disagree	Neither agree or disagree	Strongly agree	Strongly agree	Strongly agree	Strongly disagree	Neither agree or disagree	Strongly disagree	Strongly disagree	Strongly disagree	Strongly disagree	Strongly agree	Strongly agree	Strongly agree	Strongly agree	Strongly disagree	Strongly agree	Strongly agree	Strongly agree	Strongly disagree	Strongly agree	Strongly agree	Strongly disagree	Strongly agree	Strongly agree	Neither agree or disagree	Strongly disagree	Strongly agree	Strongly disagree	Strongly agree	Strongly disagree	Strongly disagree	Strongly disagree	Strongly disagree	Strongly disagree	Strongly disagree	Strongly agree	Strongly agree
2018-10-25 11:59:20	Neither agree or disagree	Rather agree	Strongly disagree	Agree	Rather agree	Rather agree	Rather agree	Rather disagree	Rather disagree	Rather disagree	Neither agree or disagree	Rather agree	Rather agree	Rather agree	Rather agree	Rather agree	Strongly disagree	Strongly disagree	Strongly disagree	Strongly disagree	Strongly disagree	Strongly disagree	Strongly disagree	Strongly disagree	Rather disagree	Agree	Strongly disagree	Rather agree	Rather agree	Strongly disagree	Strongly disagree	Rather agree	Neither agree or disagree	Strongly disagree	Agree	Strongly disagree	Agree	Strongly disagree	Agree	Strongly disagree	Agree	Agree	Strongly disagree	Strongly disagree	Strongly disagree	Strongly disagree	Rather agree	Strongly disagree	Rather agree
2018-10-25 13:25:59	Rather disagree	Neither agree or disagree	Rather disagree	Neither agree or disagree	Strongly agree	Rather agree	Strongly disagree	Rather agree	Neither agree or disagree	Rather disagree	Strongly disagree	Rather agree	Rather disagree	Strongly disagree	Disagree	Neither agree or disagree	Neither agree or disagree	Neither agree or disagree	Neither agree or disagree	Neither agree or disagree	Neither agree or disagree	Neither agree or disagree	Neither agree or disagree	Neither agree or disagree	Neither agree or disagree	Strongly agree	Rather agree	Strongly agree	Strongly agree	Strongly disagree	Rather agree	Strongly agree	Strongly agree	Strongly disagree	Strongly agree	Strongly agree	Rather agree	Strongly agree	Rather agree	Rather agree	Strongly agree	Neither agree or disagree	Strongly agree	Neither agree or disagree	Rather disagree	Rather agree	Strongly agree	Strongly agree	Strongly agree
2018-10-25 13:41:10	Neither agree or disagree	Rather disagree	Disagree	Rather agree	Agree	Agree	Rather agree	Rather disagree	Neither agree or disagree	Rather disagree	Disagree	Neither agree or disagree	Rather disagree	Disagree	Rather disagree	Disagree	Disagree	Rather disagree	Disagree	Strongly disagree	Strongly disagree	Strongly disagree	Strongly disagree	Strongly disagree	Strongly disagree	Agree	Rather agree	Agree	Agree	Neither agree or disagree	Rather agree	Agree	Strongly disagree	Strongly disagree	Agree	Rather agree	Rather agree	Rather disagree	Strongly agree	Rather agree	Strongly agree	Rather disagree	Rather disagree	Rather disagree	Disagree	Neither agree or disagree	Agree	Agree	Rather agree
2018-10-25 15:01:52	Strongly disagree	Strongly disagree	Strongly disagree	Strongly disagree	Rather agree	Rather agree	Strongly disagree	Rather disagree	Rather disagree	Rather agree	Rather agree	Rather agree	Neither agree or disagree	Neither agree or disagree	Neither agree or disagree	Neither agree or disagree	Neither agree or disagree	Neither agree or disagree	Strongly disagree	Strongly disagree	Strongly disagree	Strongly disagree	Neither agree or disagree	Neither agree or disagree	Neither agree or disagree	Agree	Disagree	Agree	Agree	Disagree	Disagree	Agree	Disagree	Disagree	Agree	Rather disagree	Agree	Disagree	Rather agree	Rather disagree	Agree	Agree	Rather disagree	Rather disagree	Disagree	Disagree	Agree	Rather disagree	Agree
2018-10-25 15:04:36	Neither agree or disagree	Neither agree or disagree	Strongly disagree	Rather agree	Agree	Rather agree	Agree	Rather disagree	Strongly disagree	Disagree	Strongly disagree	Neither agree or disagree	Neither agree or disagree	Neither agree or disagree	Neither agree or disagree	Neither agree or disagree	Neither agree or disagree	Neither agree or disagree	Neither agree or disagree	Neither agree or disagree	Neither agree or disagree	Rather agree	Neither agree or disagree	Neither agree or disagree	Neither agree or disagree	Agree	Rather agree	Agree	Agree	Rather agree	Rather agree	Strongly agree	Agree	Rather disagree	Rather agree	Neither agree or disagree	Rather agree	Rather agree	Agree	Rather agree	Agree	Agree	Agree	Rather disagree	Disagree	Rather disagree	Rather agree	Rather agree	Strongly agree
2018-10-25 15:09:42	Strongly agree	Strongly disagree	Strongly disagree	Strongly agree	Rather agree	Rather agree	Disagree	Rather agree	Disagree	Strongly disagree	Rather agree	Rather agree	Neither agree or disagree	Neither agree or disagree	Neither agree or disagree	Neither agree or disagree	Strongly disagree	Strongly disagree	Strongly disagree	Strongly disagree	Strongly disagree	Strongly disagree	Strongly disagree	Strongly disagree	Strongly disagree	Strongly agree	Strongly disagree	Strongly agree	Strongly agree	Strongly disagree	Strongly disagree	Strongly agree	Strongly disagree	Strongly disagree	Strongly agree	Strongly disagree	Strongly agree	Strongly disagree	Strongly agree	Strongly disagree	Strongly agree	Strongly agree	Rather agree	Disagree	Strongly disagree	Strongly disagree	Strongly agree	Strongly disagree	Strongly agree
2018-10-25 15:46:20	Disagree	Strongly disagree	Strongly disagree	Strongly disagree	Disagree	Strongly disagree	Strongly disagree	Strongly disagree	Strongly disagree	Strongly disagree	Strongly disagree	Strongly disagree	Strongly disagree	Neither agree or disagree	Neither agree or disagree	Neither agree or disagree	Neither agree or disagree	Neither agree or disagree	Neither agree or disagree	Neither agree or disagree	Neither agree or disagree	Neither agree or disagree	Neither agree or disagree	Neither agree or disagree	Neither agree or disagree	Agree	Rather disagree	Strongly agree	Agree	Rather disagree	Rather agree	Agree	Rather disagree	Disagree	Agree	Rather agree	Rather agree	Rather disagree	Rather agree	Rather agree	Rather agree	Rather agree	Rather disagree	Neither agree or disagree	Strongly disagree	Strongly disagree	Rather agree	Disagree	Agree
2018-10-25 17:04:19	Strongly disagree	Strongly disagree	Strongly disagree	Rather agree	Neither agree or disagree	Rather agree	Rather agree	Strongly disagree	Strongly disagree	Strongly disagree	Strongly disagree	Strongly disagree	Strongly disagree	Strongly disagree	Strongly disagree	Strongly disagree	Strongly disagree	Strongly disagree	Strongly disagree	Strongly disagree	Strongly disagree	Strongly disagree	Strongly disagree	Strongly disagree	Strongly disagree	Agree	Strongly disagree	Agree	Strongly agree	Disagree	Disagree	Agree	Rather disagree	Strongly disagree	Agree	Disagree	Agree	Disagree	Agree	Rather disagree	Agree	Agree	Rather disagree	Rather disagree	Rather disagree	Disagree	Agree	Rather disagree	Agree
2018-10-25 18:08:19	Strongly disagree	Strongly agree	Strongly agree	Strongly agree	Rather disagree	Agree	Agree	Strongly disagree	Strongly disagree	Strongly disagree	Rather agree	Rather agree	Neither agree or disagree	Strongly disagree	Strongly disagree	Strongly disagree	Strongly disagree	Strongly disagree	Strongly disagree	Strongly disagree	Strongly disagree	Strongly disagree	Neither agree or disagree	Strongly disagree	Agree	Strongly agree	Strongly disagree	Strongly agree	Strongly agree	Strongly agree	Strongly disagree	Strongly agree	Neither agree or disagree	Strongly disagree	Strongly agree	Strongly disagree	Strongly agree	Strongly disagree	Strongly agree	Strongly disagree	Strongly agree	Strongly agree	Strongly disagree	Strongly disagree	Strongly disagree	Strongly disagree	Strongly agree	Strongly disagree	Strongly agree
2018-10-25 18:31:49	Rather disagree	Neither agree or disagree	Rather disagree	Rather agree	Agree	Strongly agree	Neither agree or disagree	Rather disagree	Rather disagree	Neither agree or disagree	Rather disagree	Rather agree	Neither agree or disagree	Neither agree or disagree	Neither agree or disagree	Neither agree or disagree	Neither agree or disagree	Disagree	Disagree	Disagree	Disagree	Disagree	Neither agree or disagree	Neither agree or disagree	Neither agree or disagree	Rather disagree	Agree	Agree	Rather disagree	Rather disagree	Rather agree	Rather agree	Rather agree	Rather disagree	Neither agree or disagree	Rather disagree	Agree	Rather agree	Strongly agree	Agree	Rather agree	Rather agree	Rather agree	Rather disagree	Disagree	Rather agree	Neither agree or disagree	Rather agree	Strongly agree
2018-10-25 20:55:39	Neither agree or disagree	Rather disagree	Neither agree or disagree	Rather disagree	Neither agree or disagree	Neither agree or disagree	Rather disagree	Strongly disagree	Strongly disagree	Strongly disagree	Disagree	Disagree	Rather disagree	Neither agree or disagree	Neither agree or disagree	Neither agree or disagree	Neither agree or disagree	Disagree	Strongly disagree	Disagree	Neither agree or disagree	Neither agree or disagree	Rather agree	Neither agree or disagree	Neither agree or disagree	Rather agree	Rather disagree	Agree	Rather agree	Rather disagree	Strongly disagree	Agree	Disagree	Strongly disagree	Rather agree	Rather disagree	Agree	Rather disagree	Rather agree	Rather agree	Strongly agree	Rather agree	Neither agree or disagree	Rather disagree	Strongly disagree	Disagree	Agree	Rather agree	Strongly agree
2018-10-25 21:41:24	Strongly disagree	Disagree	Neither agree or disagree	Strongly agree	Rather agree	Strongly agree	Neither agree or disagree	Strongly disagree	Disagree	Strongly disagree	Strongly disagree	Strongly disagree	Strongly disagree	Strongly disagree	Strongly disagree	Strongly disagree	Strongly disagree	Strongly disagree	Strongly disagree	Strongly disagree	Strongly disagree	Strongly disagree	Strongly disagree	Strongly disagree	Strongly disagree	Strongly agree	Rather disagree	Strongly agree	Strongly agree	Rather disagree	Rather disagree	Strongly agree	Strongly agree	Strongly disagree	Rather agree	Rather agree	Strongly agree	Rather disagree	Rather agree	Rather disagree	Agree	Agree	Rather disagree	Rather disagree	Strongly disagree	Rather disagree	Agree	Rather disagree	Strongly agree
2018-10-25 21:42:27	Disagree	Strongly disagree	Strongly disagree	Disagree	Rather agree	Rather agree	Disagree	Strongly disagree	Disagree	Strongly disagree	Strongly disagree	Strongly disagree	Strongly disagree	Strongly disagree	Strongly disagree	Strongly disagree	Strongly disagree	Strongly disagree	Strongly disagree	Strongly disagree	Strongly disagree	Strongly disagree	Strongly disagree	Strongly disagree	Strongly disagree	Rather agree	Rather agree	Agree	Rather agree	Rather disagree	Rather agree	Agree	Disagree	Disagree	Rather agree	Rather disagree	Rather agree	Rather disagree	Agree	Rather agree	Agree	Rather agree	Rather agree	Rather disagree	Disagree	Rather disagree	Rather agree	Rather agree	Agree
2018-10-26 03:44:08	Disagree	Disagree	Disagree	Strongly disagree	Neither agree or disagree	Rather agree	Strongly disagree	Strongly disagree	Strongly disagree	Strongly disagree	Strongly disagree	Strongly disagree	Strongly disagree	Strongly disagree	Disagree	Strongly disagree	Strongly disagree	Strongly disagree	Strongly disagree	Strongly disagree	Strongly disagree	Strongly disagree	Strongly disagree	Strongly disagree	Strongly disagree	Agree	Disagree	Agree	Agree	Disagree	Strongly disagree	Agree	Rather agree	Strongly disagree	Agree	Rather disagree	Strongly disagree	Strongly disagree	Rather agree	Disagree	Agree	Agree	Disagree	Disagree	Disagree	Disagree	Agree	Neither agree or disagree	Agree
2018-10-26 10:23:41	Strongly disagree	Rather disagree	Rather agree	Agree	Rather disagree	Neither agree or disagree	Neither agree or disagree	Rather disagree	Disagree	Strongly disagree	Rather disagree	Rather agree	Rather disagree	Disagree	Disagree	Strongly disagree	Disagree	Disagree	Disagree	Strongly disagree	Strongly disagree	Strongly disagree	Strongly disagree	Neither agree or disagree	Rather disagree	Strongly agree	Rather disagree	Agree	Strongly agree	Disagree	Strongly disagree	Agree	Rather disagree	Strongly disagree	Agree	Disagree	Agree	Strongly disagree	Agree	Strongly disagree	Agree	Agree	Strongly disagree	Disagree	Strongly disagree	Rather disagree	Rather agree	Disagree	Agree
2018-10-26 10:33:54	Rather disagree	Disagree	Neither agree or disagree	Rather agree	Strongly agree	Agree	Rather disagree	Rather agree	Rather disagree	Disagree	Neither agree or disagree	Disagree	Strongly disagree	Strongly disagree	Disagree	Rather disagree	Strongly disagree	Strongly disagree	Strongly disagree	Strongly disagree	Strongly disagree	Strongly disagree	Strongly disagree	Strongly disagree	Strongly disagree	Rather agree	Rather agree	Rather agree	Rather agree	Rather disagree	Rather agree	Rather agree	Rather agree	Rather disagree	Rather agree	Rather disagree	Agree	Rather disagree	Rather agree	Rather disagree	Rather agree	Rather agree	Rather agree	Rather agree	Strongly disagree	Rather agree	Rather agree	Rather agree	Agree
2018-10-26 13:07:42	Rather disagree	Neither agree or disagree	Strongly agree	Rather agree	Rather agree	Rather agree	Rather disagree	Disagree	Disagree	Strongly disagree	Neither agree or disagree	Disagree	Strongly disagree	Strongly disagree	Strongly disagree	Disagree	Strongly disagree	Strongly disagree	Strongly disagree	Strongly disagree	Strongly disagree	Strongly disagree	Rather disagree	Rather disagree	Rather disagree	Agree	Disagree	Strongly agree	Agree	Disagree	Disagree	Agree	Strongly disagree	Strongly disagree	Strongly agree	Disagree	Agree	Disagree	Strongly agree	Rather disagree	Rather agree	Neither agree or disagree	Neither agree or disagree	Rather disagree	Disagree	Disagree	Agree	Disagree	Strongly agree
2018-10-26 13:40:56	Rather disagree	Rather agree	Disagree	Strongly agree	Strongly agree	Strongly agree	Strongly agree	Disagree	Strongly disagree	Strongly disagree	Strongly disagree	Neither agree or disagree	Neither agree or disagree	Rather agree	Rather agree	Strongly disagree	Neither agree or disagree	Strongly disagree	Strongly disagree	Strongly disagree	Strongly disagree	Strongly disagree	Strongly disagree	Strongly disagree	Strongly disagree	Rather agree	Rather agree	Strongly agree	Strongly agree	Rather disagree	Rather agree	Strongly agree	Strongly disagree	Strongly disagree	Agree	Rather disagree	Strongly agree	Rather disagree	Rather agree	Disagree	Rather agree	Strongly agree	Neither agree or disagree	Rather agree	Strongly disagree	Strongly disagree	Rather agree	Rather disagree	Strongly agree
2018-10-26 13:44:18	Neither agree or disagree	Rather disagree	Disagree	Rather agree	Rather disagree	Neither agree or disagree	Rather disagree	Disagree	Rather disagree	Strongly disagree	Neither agree or disagree	Neither agree or disagree	Strongly disagree	Strongly disagree	Strongly disagree	Strongly disagree	Strongly disagree	Strongly disagree	Strongly disagree	Strongly disagree	Strongly disagree	Strongly disagree	Strongly disagree	Strongly disagree	Strongly disagree	Agree	Strongly disagree	Rather agree	Rather agree	Rather disagree	Disagree	Rather agree	Rather agree	Strongly disagree	Rather agree	Disagree	Strongly agree	Rather disagree	Rather agree	Disagree	Rather agree	Rather agree	Neither agree or disagree	Disagree	Disagree	Rather disagree	Agree	Disagree	Agree
2018-10-26 13:51:00	Disagree	Neither agree or disagree	Disagree	Strongly agree	Rather agree	Agree	Rather disagree	Strongly disagree	Strongly disagree	Strongly disagree	Disagree	Strongly disagree	Strongly disagree	Strongly disagree	Strongly disagree	Disagree	Strongly disagree	Strongly disagree	Strongly disagree	Strongly disagree	Strongly disagree	Strongly disagree	Strongly disagree	Strongly disagree	Strongly disagree	Agree	Neither agree or disagree	Agree	Agree	Disagree	Rather disagree	Agree	Strongly agree	Strongly disagree	Agree	Rather agree	Strongly agree	Strongly disagree	Agree	Disagree	Agree	Agree	Disagree	Strongly disagree	Strongly disagree	Disagree	Agree	Strongly disagree	Agree
2018-10-26 15:00:45	Rather disagree	Strongly disagree	Disagree	Agree	Rather agree	Agree	Rather agree	Rather disagree	Agree	Neither agree or disagree	Rather disagree	Rather agree	Disagree	Disagree	Disagree	Strongly disagree	Strongly disagree	Disagree	Strongly disagree	Rather disagree	Disagree	Disagree	Disagree	Disagree	Disagree	Rather agree	Rather agree	Neither agree or disagree	Rather agree	Strongly disagree	Strongly disagree	Agree	Rather agree	Disagree	Rather agree	Strongly disagree	Rather agree	Disagree	Rather agree	Disagree	Agree	Strongly agree	Rather disagree	Strongly disagree	Strongly disagree	Rather agree	Strongly disagree	Rather agree	Agree
2018-10-26 15:24:12	Agree	Rather agree	Agree	Strongly agree	Strongly agree	Strongly agree	Strongly agree	Neither agree or disagree	Agree	Neither agree or disagree	Neither agree or disagree	Rather disagree	Disagree	Rather disagree	Neither agree or disagree	Neither agree or disagree	Neither agree or disagree	Neither agree or disagree	Neither agree or disagree	Neither agree or disagree	Neither agree or disagree	Neither agree or disagree	Rather agree	Rather agree	Rather agree	Rather agree	Rather agree	Rather agree	Rather agree	Neither agree or disagree	Neither agree or disagree	Agree	Rather disagree	Disagree	Agree	Agree	Rather agree	Rather disagree	Rather agree	Agree	Rather agree	Rather disagree	Strongly disagree	Rather agree	Rather disagree	Agree	Rather disagree	Agree	Agree
2018-10-26 15:27:15	Neither agree or disagree	Neither agree or disagree	Rather disagree	Neither agree or disagree	Rather agree	Rather agree	Rather disagree	Rather disagree	Neither agree or disagree	Disagree	Neither agree or disagree	Neither agree or disagree	Rather disagree	Neither agree or disagree	Neither agree or disagree	Neither agree or disagree	Neither agree or disagree	Neither agree or disagree	Neither agree or disagree	Neither agree or disagree	Neither agree or disagree	Neither agree or disagree	Neither agree or disagree	Neither agree or disagree	Neither agree or disagree	Rather agree	Rather disagree	Rather agree	Neither agree or disagree	Neither agree or disagree	Neither agree or disagree	Rather agree	Neither agree or disagree	Rather disagree	Neither agree or disagree	Rather disagree	Rather agree	Rather disagree	Neither agree or disagree	Rather disagree	Neither agree or disagree	Neither agree or disagree	Rather disagree	Rather disagree	Rather disagree	Rather disagree	Neither agree or disagree	Rather disagree	Rather agree
2018-10-26 15:27:56	Rather agree	Strongly agree	Strongly agree	Strongly agree	Strongly agree	Strongly agree	Strongly agree	Agree	Strongly agree	Strongly agree	Rather agree	Strongly agree	Strongly agree	Strongly agree	Strongly agree	Strongly agree	Strongly agree	Rather agree	Rather disagree	Rather disagree	Disagree	Strongly agree	Agree	Rather agree	Disagree	Strongly disagree	Rather agree	Agree	Rather agree	Neither agree or disagree	Rather agree	Strongly disagree	Rather agree	Strongly disagree	Rather disagree	Rather agree	Rather agree	Strongly agree	Strongly agree	Strongly agree	Strongly agree	Strongly agree	Strongly agree	Strongly agree	Agree	Strongly agree	Agree	Disagree	Disagree
2018-10-26 15:38:49	Rather agree	Rather agree	Rather agree	Agree	Strongly agree	Strongly agree	Rather agree	Agree	Agree	Rather agree	Rather agree	Rather agree	Rather disagree	Rather disagree	Rather disagree	Neither agree or disagree	Neither agree or disagree	Neither agree or disagree	Neither agree or disagree	Neither agree or disagree	Neither agree or disagree	Neither agree or disagree	Neither agree or disagree	Neither agree or disagree	Neither agree or disagree	Rather agree	Rather agree	Agree	Agree	Rather agree	Agree	Rather agree	Rather agree	Rather disagree	Rather agree	Rather agree	Rather agree	Neither agree or disagree	Rather agree	Rather disagree	Rather disagree	Rather agree	Agree	Neither agree or disagree	Rather disagree	Rather disagree	Rather disagree	Rather agree	Rather agree
2018-10-26 15:42:48	Agree	Disagree	Rather disagree	Rather agree	Agree	Strongly agree	Rather disagree	Disagree	Rather disagree	Rather agree	Disagree	Rather agree	Strongly disagree	Rather agree	Agree	Rather disagree	Strongly disagree	Strongly disagree	Strongly disagree	Disagree	Strongly disagree	Disagree	Rather agree	Strongly disagree	Rather agree	Rather agree	Rather agree	Agree	Strongly agree	Rather disagree	Rather agree	Agree	Agree	Rather agree	Rather agree	Rather agree	Rather agree	Rather disagree	Strongly agree	Agree	Rather agree	Strongly agree	Disagree	Rather agree	Disagree	Rather disagree	Rather disagree	Rather agree	Strongly agree
2018-10-26 15:53:23	Rather disagree	Rather disagree	Rather disagree	Rather agree	Rather agree	Rather agree	Rather agree	Neither agree or disagree	Rather disagree	Rather disagree	Rather disagree	Neither agree or disagree	Neither agree or disagree	Neither agree or disagree	Neither agree or disagree	Neither agree or disagree	Neither agree or disagree	Neither agree or disagree	Neither agree or disagree	Neither agree or disagree	Neither agree or disagree	Neither agree or disagree	Neither agree or disagree	Neither agree or disagree	Neither agree or disagree	Agree	Rather agree	Rather agree	Rather agree	Rather agree	Rather agree	Rather agree	Rather agree	Neither agree or disagree	Rather agree	Rather agree	Neither agree or disagree	Rather agree	Rather agree	Neither agree or disagree	Agree	Rather agree	Neither agree or disagree	Neither agree or disagree	Rather disagree	Rather agree	Rather agree	Neither agree or disagree	Rather agree
2018-10-26 16:02:44	Neither agree or disagree	Agree	Agree	Rather disagree	Rather disagree	Rather agree	Rather agree	Rather agree	Rather disagree	Rather disagree	Rather agree	Agree	Strongly agree	Neither agree or disagree	Agree	Agree	Agree	Rather agree	Agree	Rather agree	Agree	Rather agree	Strongly agree	Agree	Neither agree or disagree	Agree	Neither agree or disagree	Agree	Agree	Strongly agree	Agree	Neither agree or disagree	Rather agree	Rather agree	Neither agree or disagree	Neither agree or disagree	Rather agree	Neither agree or disagree	Neither agree or disagree	Rather agree	Agree	Agree	Rather disagree	Rather agree	Neither agree or disagree	Neither agree or disagree	Rather agree	Rather agree	Rather agree
2018-10-26 16:10:12	Disagree	Neither agree or disagree	Disagree	Strongly agree	Neither agree or disagree	Rather agree	Rather disagree	Rather disagree	Disagree	Rather agree	Neither agree or disagree	Rather disagree	Disagree	Rather disagree	Neither agree or disagree	Rather disagree	Disagree	Disagree	Strongly disagree	Strongly disagree	Strongly disagree	Strongly disagree	Disagree	Strongly disagree	Disagree	Disagree	Agree	Rather agree	Neither agree or disagree	Rather disagree	Strongly agree	Rather agree	Strongly agree	Neither agree or disagree	Strongly disagree	Agree	Rather disagree	Rather agree	Neither agree or disagree	Strongly agree	Rather disagree	Strongly disagree	Strongly disagree	Strongly agree	Rather disagree	Strongly agree	Disagree	Agree	Agree
2018-10-26 16:10:14	Disagree	Disagree	Rather disagree	Rather agree	Rather agree	Agree	Rather agree	Neither agree or disagree	Disagree	Disagree	Strongly agree	Strongly agree	Neither agree or disagree	Rather disagree	Neither agree or disagree	Neither agree or disagree	Neither agree or disagree	Neither agree or disagree	Neither agree or disagree	Neither agree or disagree	Neither agree or disagree	Neither agree or disagree	Neither agree or disagree	Neither agree or disagree	Neither agree or disagree	Strongly agree	Rather disagree	Strongly agree	Strongly agree	Neither agree or disagree	Strongly disagree	Strongly agree	Strongly agree	Strongly disagree	Strongly agree	Neither agree or disagree	Strongly agree	Strongly disagree	Agree	Rather disagree	Agree	Rather agree	Neither agree or disagree	Strongly disagree	Strongly disagree	Strongly disagree	Strongly agree	Strongly disagree	Rather agree
2018-10-26 16:17:51	Strongly disagree	Rather disagree	Strongly disagree	Strongly agree	Neither agree or disagree	Neither agree or disagree	Neither agree or disagree	Strongly disagree	Rather agree	Rather agree	Strongly disagree	Strongly disagree	Strongly disagree	Strongly disagree	Strongly disagree	Strongly disagree	Strongly disagree	Strongly disagree	Strongly disagree	Disagree	Strongly disagree	Strongly disagree	Disagree	Strongly disagree	Strongly disagree	Disagree	Strongly agree	Rather agree	Neither agree or disagree	Rather disagree	Strongly agree	Rather disagree	Strongly agree	Agree	Disagree	Strongly agree	Rather agree	Agree	Neither agree or disagree	Strongly agree	Rather disagree	Disagree	Strongly disagree	Strongly agree	Rather disagree	Strongly agree	Disagree	Strongly agree	Rather agree
2018-10-26 16:19:32	Disagree	Disagree	Disagree	Agree	Disagree	Rather agree	Rather disagree	Disagree	Rather agree	Rather agree	Strongly agree	Strongly agree	Strongly disagree	Strongly disagree	Strongly disagree	Strongly disagree	Strongly disagree	Strongly disagree	Strongly disagree	Strongly disagree	Strongly disagree	Strongly disagree	Strongly disagree	Strongly disagree	Strongly disagree	Agree	Disagree	Strongly agree	Strongly agree	Disagree	Rather agree	Strongly agree	Agree	Strongly disagree	Agree	Agree	Strongly agree	Rather agree	Rather disagree	Rather agree	Neither agree or disagree	Disagree	Rather agree	Strongly disagree	Disagree	Disagree	Neither agree or disagree	Disagree	Strongly agree
2018-10-26 17:23:16	Disagree	Strongly agree	Rather agree	Strongly agree	Rather agree	Agree	Rather agree	Rather disagree	Rather disagree	Strongly disagree	Rather disagree	Rather agree	Rather agree	Rather agree	Neither agree or disagree	Rather agree	Disagree	Rather disagree	Strongly disagree	Strongly disagree	Strongly disagree	Strongly disagree	Neither agree or disagree	Rather agree	Rather agree	Strongly agree	Strongly disagree	Strongly agree	Strongly agree	Strongly disagree	Strongly disagree	Strongly agree	Disagree	Strongly disagree	Strongly agree	Disagree	Strongly agree	Disagree	Strongly agree	Strongly disagree	Strongly agree	Neither agree or disagree	Strongly disagree	Strongly disagree	Strongly disagree	Strongly disagree	Agree	Strongly disagree	Rather agree
2018-10-26 17:24:16	Rather agree	Strongly agree	Rather disagree	Strongly agree	Agree	Agree	Rather disagree	Rather disagree	Rather agree	Rather agree	Strongly agree	Strongly agree	Rather agree	Strongly agree	Strongly agree	Neither agree or disagree	Strongly disagree	Strongly disagree	Strongly disagree	Strongly disagree	Strongly disagree	Strongly disagree	Neither agree or disagree	Strongly disagree	Neither agree or disagree	Rather agree	Rather disagree	Agree	Agree	Rather disagree	Strongly disagree	Agree	Strongly disagree	Strongly disagree	Strongly agree	Rather agree	Agree	Neither agree or disagree	Agree	Rather disagree	Strongly agree	Strongly agree	Rather disagree	Disagree	Strongly disagree	Rather disagree	Strongly agree	Strongly disagree	Strongly agree
2018-10-26 18:13:39	Rather agree	Rather disagree	Rather agree	Rather disagree	Rather agree	Neither agree or disagree	Rather agree	Rather disagree	Strongly disagree	Rather agree	Neither agree or disagree	Agree	Agree	Rather disagree	Disagree	Strongly disagree	Strongly agree	Rather agree	Agree	Neither agree or disagree	Neither agree or disagree	Agree	Rather agree	Strongly agree	Rather disagree	Rather disagree	Disagree	Agree	Strongly agree	Strongly disagree	Rather agree	Agree	Rather agree	Agree	Disagree	Rather disagree	Neither agree or disagree	Neither agree or disagree	Neither agree or disagree	Rather agree	Agree	Rather disagree	Disagree	Strongly disagree	Strongly disagree	Strongly disagree	Strongly agree	Strongly disagree	Strongly agree
2018-10-26 18:46:20	Neither agree or disagree	Rather agree	Neither agree or disagree	Rather agree	Strongly agree	Agree	Agree	Rather disagree	Rather disagree	Rather disagree	Neither agree or disagree	Neither agree or disagree	Neither agree or disagree	Strongly disagree	Strongly disagree	Neither agree or disagree	Strongly disagree	Strongly disagree	Strongly disagree	Strongly disagree	Strongly disagree	Strongly disagree	Strongly disagree	Strongly disagree	Strongly disagree	Rather agree	Rather agree	Rather agree	Rather agree	Rather disagree	Rather disagree	Rather agree	Disagree	Disagree	Rather agree	Rather disagree	Rather agree	Rather disagree	Rather agree	Rather disagree	Rather agree	Rather agree	Rather disagree	Rather disagree	Rather disagree	Rather disagree	Rather agree	Rather agree	Strongly agree
2018-10-26 19:07:15	Disagree	Rather agree	Strongly disagree	Rather agree	Strongly agree	Strongly agree	Rather agree	Rather disagree	Strongly disagree	Disagree	Rather agree	Rather agree	Rather agree	Rather agree	Agree	Strongly disagree	Rather agree	Rather agree	Rather disagree	Strongly disagree	Strongly disagree	Strongly disagree	Agree	Strongly agree	Strongly agree	Rather agree	Rather agree	Rather agree	Rather disagree	Rather agree	Agree	Rather agree	Rather agree	Strongly disagree	Rather disagree	Strongly agree	Rather agree	Agree	Rather agree	Strongly agree	Rather disagree	Rather disagree	Agree	Agree	Agree	Strongly agree	Rather disagree	Disagree	Agree
2018-10-26 19:37:13	Strongly disagree	Strongly disagree	Strongly disagree	Rather disagree	Agree	Strongly agree	Strongly agree	Strongly disagree	Strongly disagree	Strongly disagree	Rather agree	Rather disagree	Strongly disagree	Disagree	Strongly disagree	Neither agree or disagree	Strongly disagree	Strongly disagree	Strongly disagree	Strongly disagree	Strongly disagree	Strongly disagree	Neither agree or disagree	Neither agree or disagree	Neither agree or disagree	Rather agree	Agree	Rather agree	Rather agree	Rather agree	Disagree	Rather agree	Strongly disagree	Rather disagree	Disagree	Strongly agree	Strongly agree	Disagree	Rather agree	Strongly agree	Agree	Rather disagree	Strongly disagree	Rather disagree	Disagree	Rather agree	Strongly agree	Strongly disagree	Rather agree
2018-10-26 22:14:54	Neither agree or disagree	Neither agree or disagree	Rather disagree	Rather agree	Neither agree or disagree	Rather agree	Rather disagree	Strongly disagree	Strongly disagree	Rather agree	Neither agree or disagree	Rather disagree	Disagree	Disagree	Neither agree or disagree	Neither agree or disagree	Neither agree or disagree	Strongly disagree	Strongly disagree	Neither agree or disagree	Neither agree or disagree	Neither agree or disagree	Neither agree or disagree	Neither agree or disagree	Neither agree or disagree	Rather agree	Rather agree	Rather agree	Rather disagree	Rather agree	Rather disagree	Neither agree or disagree	Neither agree or disagree	Neither agree or disagree	Neither agree or disagree	Strongly agree	Neither agree or disagree	Neither agree or disagree	Strongly agree	Agree	Rather disagree	Agree	Rather agree	Rather disagree	Neither agree or disagree	Rather disagree	Rather agree	Rather disagree	Rather agree
2018-10-27 02:35:00	Strongly agree	Strongly disagree	Rather disagree	Rather agree	Strongly agree	Strongly agree	Rather agree	Agree	Agree	Strongly disagree	Disagree	Neither agree or disagree	Strongly disagree	Neither agree or disagree	Neither agree or disagree	Rather agree	Neither agree or disagree	Rather disagree	Rather agree	Strongly disagree	Strongly disagree	Strongly disagree	Agree	Neither agree or disagree	Neither agree or disagree	Rather agree	Agree	Strongly agree	Rather agree	Rather disagree	Rather agree	Rather agree	Rather agree	Rather agree	Rather disagree	Rather agree	Rather agree	Strongly disagree	Rather disagree	Strongly agree	Rather disagree	Neither agree or disagree	Strongly agree	Strongly disagree	Strongly disagree	Agree	Neither agree or disagree	Rather agree	Strongly agree
2018-10-27 11:35:10	Rather disagree	Rather agree	Rather disagree	Strongly agree	Rather agree	Rather agree	Rather disagree	Strongly disagree	Disagree	Disagree	Neither agree or disagree	Neither agree or disagree	Neither agree or disagree	Strongly disagree	Strongly disagree	Strongly disagree	Strongly disagree	Strongly disagree	Strongly disagree	Strongly disagree	Strongly disagree	Strongly disagree	Strongly disagree	Strongly disagree	Strongly disagree	Agree	Disagree	Strongly agree	Strongly agree	Disagree	Strongly disagree	Strongly agree	Rather agree	Strongly disagree	Strongly agree	Strongly disagree	Strongly agree	Strongly disagree	Strongly agree	Rather disagree	Strongly agree	Strongly agree	Rather disagree	Disagree	Strongly disagree	Disagree	Strongly agree	Strongly disagree	Strongly agree
2018-10-27 12:33:03	Rather agree	Neither agree or disagree	Rather disagree	Rather agree	Rather agree	Agree	Neither agree or disagree	Rather disagree	Rather disagree	Rather disagree	Rather disagree	Rather disagree	Rather disagree	Rather disagree	Neither agree or disagree	Neither agree or disagree	Disagree	Neither agree or disagree	Strongly disagree	Strongly disagree	Strongly disagree	Disagree	Neither agree or disagree	Neither agree or disagree	Neither agree or disagree	Rather agree	Rather disagree	Rather agree	Agree	Rather disagree	Rather disagree	Rather agree	Rather disagree	Disagree	Rather agree	Rather agree	Rather agree	Rather disagree	Rather agree	Rather agree	Rather agree	Rather disagree	Rather disagree	Rather disagree	Disagree	Disagree	Rather agree	Neither agree or disagree	Agree
2018-10-28 15:37:50	Strongly disagree	Rather agree	Rather agree	Rather agree	Rather agree	Rather agree	Rather agree	Strongly disagree	Strongly disagree	Rather agree	Rather disagree	Rather agree	Neither agree or disagree	Rather agree	Rather agree	Rather agree	Disagree	Disagree	Strongly disagree	Strongly disagree	Strongly disagree	Disagree	Neither agree or disagree	Neither agree or disagree	Neither agree or disagree	Rather agree	Disagree	Rather agree	Agree	Disagree	Disagree	Agree	Neither agree or disagree	Strongly disagree	Rather agree	Disagree	Agree	Strongly disagree	Agree	Strongly disagree	Agree	Agree	Strongly disagree	Strongly disagree	Strongly disagree	Strongly disagree	Rather agree	Strongly disagree	Agree
2018-10-28 15:40:39	Strongly disagree	Strongly disagree	Disagree	Rather agree	Rather agree	Rather agree	Rather agree	Rather disagree	Rather disagree	Rather disagree	Rather agree	Rather agree	Rather agree	Neither agree or disagree	Neither agree or disagree	Neither agree or disagree	Neither agree or disagree	Neither agree or disagree	Strongly disagree	Strongly disagree	Strongly disagree	Strongly disagree	Rather agree	Neither agree or disagree	Rather agree	Rather agree	Disagree	Rather agree	Agree	Strongly disagree	Rather disagree	Agree	Rather agree	Strongly disagree	Agree	Strongly disagree	Rather agree	Strongly disagree	Strongly agree	Strongly disagree	Agree	Agree	Strongly disagree	Strongly disagree	Strongly disagree	Strongly disagree	Agree	Strongly disagree	Strongly agree
2018-10-28 17:38:51	Agree	Rather agree	Rather agree	Rather agree	Strongly agree	Strongly agree	Neither agree or disagree	Rather disagree	Rather agree	Rather agree	Strongly disagree	Disagree	Neither agree or disagree	Neither agree or disagree	Rather disagree	Rather disagree	Neither agree or disagree	Strongly disagree	Rather agree	Neither agree or disagree	Rather disagree	Neither agree or disagree	Rather disagree	Neither agree or disagree	Strongly agree	Strongly agree	Agree	Agree	Rather agree	Neither agree or disagree	Agree	Agree	Rather disagree	Strongly disagree	Rather agree	Rather disagree	Strongly agree	Rather disagree	Agree	Strongly disagree	Neither agree or disagree	Strongly agree	Rather disagree	Rather agree	Strongly disagree	Rather agree	Rather agree	Strongly disagree	Agree
2018-10-28 19:42:16	Agree	Strongly agree	Neither agree or disagree	Rather agree	Agree	Strongly disagree	Strongly agree	Agree	Rather disagree	Agree	Disagree	Disagree	Agree	Rather agree	Agree	Agree	Agree	Rather agree	Disagree	Strongly disagree	Rather disagree	Rather disagree	Strongly agree	Agree	Agree	Disagree	Disagree	Rather disagree	Strongly agree	Disagree	Strongly disagree	Rather agree	Neither agree or disagree	Neither agree or disagree	Strongly agree	Rather agree	Rather agree	Rather disagree	Rather agree	Agree	Strongly agree	Strongly disagree	Neither agree or disagree	Rather agree	Agree	Disagree	Rather disagree	Neither agree or disagree	Rather disagree
2018-10-28 20:20:41	Strongly disagree	Strongly disagree	Strongly disagree	Strongly disagree	Rather agree	Neither agree or disagree	Rather agree	Strongly disagree	Strongly disagree	Strongly disagree	Neither agree or disagree	Neither agree or disagree	Neither agree or disagree	Strongly disagree	Neither agree or disagree	Neither agree or disagree	Neither agree or disagree	Strongly disagree	Strongly disagree	Strongly disagree	Strongly disagree	Strongly disagree	Neither agree or disagree	Strongly disagree	Neither agree or disagree	Neither agree or disagree	Rather agree	Rather agree	Rather agree	Disagree	Rather agree	Rather agree	Rather disagree	Rather disagree	Rather agree	Neither agree or disagree	Rather agree	Rather agree	Rather disagree	Rather agree	Rather agree	Rather disagree	Neither agree or disagree	Rather disagree	Neither agree or disagree	Rather disagree	Neither agree or disagree	Rather agree	Strongly agree
2018-10-28 20:27:23	Strongly disagree	Strongly disagree	Strongly disagree	Rather disagree	Rather agree	Neither agree or disagree	Strongly disagree	Strongly disagree	Strongly disagree	Strongly disagree	Neither agree or disagree	Neither agree or disagree	Neither agree or disagree	Neither agree or disagree	Neither agree or disagree	Neither agree or disagree	Neither agree or disagree	Neither agree or disagree	Neither agree or disagree	Neither agree or disagree	Neither agree or disagree	Neither agree or disagree	Neither agree or disagree	Neither agree or disagree	Neither agree or disagree	Rather agree	Rather agree	Rather agree	Rather agree	Neither agree or disagree	Neither agree or disagree	Rather agree	Neither agree or disagree	Rather disagree	Rather agree	Rather agree	Rather agree	Rather agree	Rather agree	Rather agree	Rather agree	Neither agree or disagree	Rather agree	Rather disagree	Neither agree or disagree	Neither agree or disagree	Rather disagree	Rather agree	Rather agree
2018-10-29 08:34:26	Neither agree or disagree	Rather disagree	Rather agree	Rather disagree	Rather agree	Rather agree	Rather disagree	Strongly disagree	Disagree	Strongly disagree	Rather agree	Rather agree	Rather disagree	Rather agree	Rather agree	Rather agree	Rather agree	Rather agree	Rather disagree	Rather disagree	Rather disagree	Rather disagree	Neither agree or disagree	Neither agree or disagree	Rather agree	Rather agree	Rather disagree	Strongly agree	Strongly agree	Rather disagree	Rather disagree	Strongly agree	Strongly agree	Strongly disagree	Rather agree	Disagree	Agree	Disagree	Agree	Rather disagree	Agree	Rather agree	Rather disagree	Rather disagree	Rather disagree	Strongly disagree	Strongly disagree	Rather disagree	Strongly agree
2018-10-29 09:37:48	Strongly disagree	Strongly disagree	Strongly disagree	Strongly disagree	Strongly disagree	Strongly disagree	Strongly disagree	Strongly disagree	Strongly disagree	Strongly disagree	Strongly disagree	Strongly disagree	Strongly disagree	Strongly disagree	Strongly disagree	Strongly disagree	Strongly disagree	Strongly disagree	Strongly disagree	Strongly disagree	Strongly disagree	Strongly disagree	Strongly disagree	Strongly disagree	Strongly disagree	Strongly agree	Strongly disagree	Strongly agree	Strongly agree	Strongly disagree	Strongly disagree	Strongly agree	Strongly disagree	Strongly disagree	Strongly agree	Strongly disagree	Strongly agree	Strongly disagree	Strongly agree	Rather agree	Strongly agree	Strongly agree	Strongly disagree	Strongly disagree	Strongly disagree	Strongly disagree	Strongly agree	Strongly disagree	Strongly agree
2018-10-29 09:40:23	Strongly agree	Strongly agree	Agree	Rather disagree	Disagree	Disagree	Disagree	Neither agree or disagree	Neither agree or disagree	Neither agree or disagree	Neither agree or disagree	Neither agree or disagree	Neither agree or disagree	Rather agree	Neither agree or disagree	Rather disagree	Rather disagree	Strongly disagree	Neither agree or disagree	Neither agree or disagree	Rather disagree	Rather disagree	Neither agree or disagree	Neither agree or disagree	Neither agree or disagree	Rather agree	Neither agree or disagree	Rather agree	Neither agree or disagree	Rather disagree	Rather disagree	Strongly disagree	Disagree	Strongly disagree	Neither agree or disagree	Strongly disagree	Strongly disagree	Rather disagree	Disagree	Strongly disagree	Disagree	Disagree	Neither agree or disagree	Disagree	Disagree	Disagree	Strongly disagree	Agree	Rather agree
2018-10-29 09:44:42	Strongly disagree	Strongly disagree	Strongly disagree	Strongly disagree	Strongly disagree	Strongly disagree	Strongly disagree	Strongly disagree	Strongly disagree	Strongly disagree	Strongly disagree	Strongly disagree	Strongly disagree	Strongly disagree	Strongly disagree	Strongly disagree	Strongly disagree	Strongly disagree	Strongly disagree	Strongly disagree	Strongly disagree	Strongly disagree	Strongly disagree	Strongly disagree	Strongly disagree	Agree	Strongly disagree	Strongly agree	Strongly agree	Strongly disagree	Strongly disagree	Strongly agree	Disagree	Strongly disagree	Strongly agree	Disagree	Agree	Rather disagree	Agree	Agree	Agree	Disagree	Neither agree or disagree	Rather disagree	Disagree	Neither agree or disagree	Neither agree or disagree	Strongly disagree	Strongly agree
2018-10-29 09:53:58	Agree	Disagree	Rather disagree	Neither agree or disagree	Rather disagree	Rather disagree	Neither agree or disagree	Strongly disagree	Strongly disagree	Strongly disagree	Rather disagree	Neither agree or disagree	Neither agree or disagree	Neither agree or disagree	Neither agree or disagree	Neither agree or disagree	Neither agree or disagree	Neither agree or disagree	Neither agree or disagree	Neither agree or disagree	Neither agree or disagree	Neither agree or disagree	Rather agree	Rather agree	Rather agree	Rather agree	Rather disagree	Strongly agree	Strongly agree	Strongly disagree	Rather disagree	Disagree	Agree	Disagree	Agree	Rather disagree	Agree	Rather disagree	Rather agree	Disagree	Agree	Rather agree	Rather disagree	Rather agree	Disagree	Disagree	Strongly agree	Rather disagree	Strongly agree
2018-10-29 11:54:37	Strongly agree	Neither agree or disagree	Agree	Rather disagree	Disagree	Agree	Neither agree or disagree	Agree	Disagree	Rather disagree	Rather agree	Neither agree or disagree	Rather disagree	Rather disagree	Neither agree or disagree	Agree	Rather disagree	Neither agree or disagree	Disagree	Rather disagree	Rather disagree	Disagree	Rather disagree	Strongly disagree	Rather disagree	Rather disagree	Rather disagree	Rather disagree	Strongly disagree	Neither agree or disagree	Agree	Neither agree or disagree	Neither agree or disagree	Strongly disagree	Disagree	Neither agree or disagree	Rather disagree	Rather disagree	Rather disagree	Neither agree or disagree	Rather disagree	Disagree	Rather disagree	Disagree	Rather disagree	Disagree	Rather disagree	Rather disagree	Rather disagree
2018-10-29 11:56:48	Neither agree or disagree	Rather agree	Disagree	Strongly disagree	Rather disagree	Neither agree or disagree	Rather disagree	Disagree	Rather disagree	Disagree	Agree	Strongly agree	Agree	Strongly agree	Agree	Rather disagree	Neither agree or disagree	Rather disagree	Agree	Agree	Rather disagree	Disagree	Disagree	Rather agree	Rather disagree	Agree	Agree	Rather agree	Rather agree	Agree	Rather disagree	Neither agree or disagree	Rather agree	Agree	Rather disagree	Agree	Strongly agree	Rather agree	Neither agree or disagree	Rather disagree	Agree	Rather agree	Rather disagree	Rather disagree	Disagree	Rather disagree	Rather agree	Rather disagree	Rather agree
2018-10-29 11:58:48	Strongly disagree	Strongly disagree	Strongly disagree	Strongly disagree	Strongly disagree	Strongly disagree	Strongly disagree	Strongly disagree	Strongly disagree	Strongly disagree	Rather disagree	Neither agree or disagree	Neither agree or disagree	Neither agree or disagree	Neither agree or disagree	Neither agree or disagree	Neither agree or disagree	Neither agree or disagree	Neither agree or disagree	Neither agree or disagree	Neither agree or disagree	Neither agree or disagree	Neither agree or disagree	Neither agree or disagree	Neither agree or disagree	Agree	Rather disagree	Agree	Agree	Rather disagree	Disagree	Agree	Rather agree	Strongly disagree	Agree	Rather disagree	Agree	Rather disagree	Agree	Rather disagree	Agree	Rather agree	Rather disagree	Rather disagree	Disagree	Disagree	Agree	Strongly disagree	Strongly agree
2018-10-29 14:40:00	Neither agree or disagree	Agree	Neither agree or disagree	Rather disagree	Strongly disagree	Disagree	Strongly disagree	Strongly disagree	Strongly disagree	Disagree	Disagree	Neither agree or disagree	Disagree	Neither agree or disagree	Strongly disagree	Strongly disagree	Neither agree or disagree	Neither agree or disagree	Neither agree or disagree	Neither agree or disagree	Neither agree or disagree	Neither agree or disagree	Neither agree or disagree	Disagree	Neither agree or disagree	Strongly agree	Disagree	Strongly agree	Agree	Disagree	Neither agree or disagree	Strongly agree	Neither agree or disagree	Strongly disagree	Strongly agree	Agree	Agree	Rather agree	Agree	Rather disagree	Strongly agree	Strongly agree	Rather disagree	Strongly disagree	Strongly disagree	Rather agree	Strongly agree	Rather agree	Rather agree
2018-10-29 19:15:42	Neither agree or disagree	Rather agree	Rather disagree	Rather agree	Agree	Agree	Rather disagree	Rather disagree	Rather disagree	Rather disagree	Strongly disagree	Strongly disagree	Strongly disagree	Strongly disagree	Strongly disagree	Strongly disagree	Strongly disagree	Strongly disagree	Strongly disagree	Strongly disagree	Strongly disagree	Strongly disagree	Strongly disagree	Strongly disagree	Strongly disagree	Rather agree	Neither agree or disagree	Rather agree	Rather agree	Rather disagree	Rather disagree	Agree	Agree	Strongly disagree	Agree	Rather agree	Neither agree or disagree	Neither agree or disagree	Rather agree	Strongly agree	Rather agree	Neither agree or disagree	Rather agree	Rather agree	Strongly disagree	Neither agree or disagree	Rather agree	Rather agree	Rather agree
2018-10-29 19:20:28	Agree	Neither agree or disagree	Strongly disagree	Rather disagree	Strongly agree	Strongly agree	Rather agree	Rather agree	Rather disagree	Strongly disagree	Rather disagree	Neither agree or disagree	Disagree	Disagree	Neither agree or disagree	Neither agree or disagree	Neither agree or disagree	Neither agree or disagree	Strongly disagree	Strongly disagree	Strongly disagree	Strongly disagree	Disagree	Disagree	Disagree	Rather agree	Rather disagree	Agree	Agree	Rather disagree	Rather disagree	Rather agree	Rather disagree	Disagree	Agree	Rather agree	Strongly agree	Strongly disagree	Rather agree	Rather disagree	Agree	Agree	Disagree	Rather disagree	Strongly disagree	Disagree	Rather agree	Disagree	Strongly agree
2018-10-29 19:21:03	Agree	Neither agree or disagree	Neither agree or disagree	Agree	Strongly agree	Agree	Rather agree	Strongly disagree	Disagree	Disagree	Neither agree or disagree	Rather agree	Neither agree or disagree	Rather disagree	Rather disagree	Rather disagree	Rather disagree	Rather disagree	Rather disagree	Rather disagree	Rather disagree	Rather disagree	Rather disagree	Rather disagree	Rather disagree	Rather agree	Rather agree	Agree	Rather agree	Disagree	Rather disagree	Rather disagree	Disagree	Rather disagree	Agree	Rather disagree	Strongly agree	Rather disagree	Agree	Rather agree	Strongly agree	Strongly agree	Strongly disagree	Disagree	Rather disagree	Disagree	Strongly agree	Strongly disagree	Strongly agree
2018-10-29 19:22:13	Rather disagree	Rather agree	Rather agree	Agree	Strongly agree	Strongly agree	Rather disagree	Neither agree or disagree	Rather disagree	Rather disagree	Disagree	Rather agree	Neither agree or disagree	Disagree	Rather disagree	Disagree	Strongly disagree	Strongly disagree	Strongly disagree	Strongly disagree	Strongly disagree	Strongly disagree	Disagree	Disagree	Strongly disagree	Rather agree	Rather agree	Strongly agree	Strongly agree	Rather disagree	Agree	Strongly agree	Rather disagree	Strongly disagree	Rather agree	Agree	Strongly agree	Rather disagree	Strongly agree	Rather agree	Strongly agree	Strongly agree	Rather agree	Rather agree	Disagree	Rather disagree	Rather agree	Disagree	Agree
2018-10-29 19:26:24	Disagree	Neither agree or disagree	Disagree	Strongly disagree	Rather agree	Rather disagree	Rather agree	Disagree	Rather disagree	Strongly disagree	Rather agree	Disagree	Rather agree	Disagree	Neither agree or disagree	Rather disagree	Rather agree	Neither agree or disagree	Rather agree	Rather disagree	Strongly disagree	Rather agree	Rather disagree	Rather disagree	Neither agree or disagree	Neither agree or disagree	Agree	Rather agree	Rather disagree	Rather agree	Neither agree or disagree	Disagree	Agree	Rather disagree	Agree	Neither agree or disagree	Rather agree	Rather disagree	Disagree	Neither agree or disagree	Disagree	Neither agree or disagree	Rather disagree	Disagree	Neither agree or disagree	Neither agree or disagree	Agree	Rather disagree	Rather disagree
2018-10-29 19:28:04	Rather disagree	Rather agree	Rather agree	Rather agree	Agree	Agree	Rather agree	Rather disagree	Rather agree	Rather agree	Rather agree	Rather agree	Disagree	Rather disagree	Neither agree or disagree	Neither agree or disagree	Neither agree or disagree	Neither agree or disagree	Strongly disagree	Strongly disagree	Strongly disagree	Strongly disagree	Strongly disagree	Strongly disagree	Strongly disagree	Rather agree	Rather disagree	Rather agree	Rather agree	Rather disagree	Rather disagree	Agree	Rather agree	Strongly disagree	Rather agree	Rather agree	Rather agree	Rather disagree	Rather agree	Agree	Agree	Disagree	Strongly disagree	Disagree	Rather disagree	Rather disagree	Rather agree	Agree	Agree
2018-10-29 19:31:06	Strongly agree	Strongly agree	Strongly agree	Strongly agree	Strongly agree	Strongly agree	Strongly agree	Strongly agree	Strongly agree	Strongly agree	Strongly agree	Strongly agree	Strongly agree	Strongly agree	Strongly agree	Strongly agree	Strongly agree	Strongly agree	Strongly agree	Rather agree	Strongly agree	Rather disagree	Strongly agree	Neither agree or disagree	Rather agree	Strongly agree	Rather agree	Strongly agree	Agree	Neither agree or disagree	Rather agree	Rather agree	Strongly agree	Strongly disagree	Strongly agree	Rather agree	Agree	Rather disagree	Strongly agree	Rather disagree	Strongly agree	Rather agree	Rather disagree	Rather disagree	Disagree	Rather agree	Strongly agree	Strongly agree	Agree
2018-10-29 19:31:24	Agree	Strongly agree	Agree	Agree	Agree	Rather disagree	Agree	Disagree	Rather disagree	Rather disagree	Agree	Strongly agree	Strongly agree	Rather agree	Rather agree	Rather agree	Strongly disagree	Strongly disagree	Strongly disagree	Strongly disagree	Strongly disagree	Strongly disagree	Rather agree	Rather agree	Agree	Strongly agree	Strongly disagree	Strongly agree	Strongly agree	Strongly disagree	Strongly disagree	Strongly agree	Disagree	Strongly disagree	Strongly agree	Strongly disagree	Strongly agree	Strongly disagree	Strongly agree	Disagree	Strongly agree	Strongly agree	Disagree	Disagree	Strongly disagree	Strongly disagree	Strongly agree	Strongly disagree	Strongly agree
2018-10-29 19:32:55	Rather disagree	Neither agree or disagree	Neither agree or disagree	Rather agree	Rather agree	Agree	Rather disagree	Disagree	Rather disagree	Disagree	Neither agree or disagree	Neither agree or disagree	Neither agree or disagree	Rather disagree	Neither agree or disagree	Neither agree or disagree	Neither agree or disagree	Neither agree or disagree	Neither agree or disagree	Neither agree or disagree	Neither agree or disagree	Neither agree or disagree	Neither agree or disagree	Neither agree or disagree	Neither agree or disagree	Agree	Disagree	Agree	Agree	Rather disagree	Strongly disagree	Agree	Rather agree	Strongly disagree	Agree	Disagree	Rather agree	Rather disagree	Rather agree	Rather disagree	Agree	Rather agree	Rather disagree	Rather disagree	Disagree	Rather disagree	Agree	Disagree	Rather agree
2018-10-29 19:33:25	Rather agree	Neither agree or disagree	Neither agree or disagree	Rather agree	Agree	Agree	Rather agree	Disagree	Rather disagree	Rather disagree	Neither agree or disagree	Neither agree or disagree	Neither agree or disagree	Neither agree or disagree	Neither agree or disagree	Neither agree or disagree	Strongly disagree	Strongly disagree	Strongly disagree	Strongly disagree	Strongly disagree	Strongly disagree	Strongly disagree	Neither agree or disagree	Disagree	Agree	Rather disagree	Agree	Rather agree	Disagree	Rather disagree	Agree	Neither agree or disagree	Disagree	Rather agree	Rather agree	Rather agree	Rather disagree	Rather agree	Rather agree	Agree	Agree	Rather disagree	Rather disagree	Disagree	Rather disagree	Agree	Rather agree	Rather agree
2018-10-29 19:34:10	Agree	Agree	Rather agree	Strongly agree	Rather agree	Rather agree	Rather agree	Rather disagree	Rather disagree	Disagree	Neither agree or disagree	Neither agree or disagree	Rather disagree	Disagree	Rather disagree	Neither agree or disagree	Disagree	Strongly disagree	Strongly disagree	Strongly disagree	Strongly disagree	Strongly disagree	Disagree	Disagree	Disagree	Rather agree	Rather agree	Rather agree	Agree	Rather disagree	Rather disagree	Rather agree	Disagree	Disagree	Rather agree	Rather disagree	Rather agree	Disagree	Rather agree	Rather disagree	Agree	Agree	Rather disagree	Rather disagree	Disagree	Disagree	Rather agree	Rather agree	Neither agree or disagree
2018-10-29 19:40:33	Neither agree or disagree	Strongly agree	Rather disagree	Rather agree	Rather agree	Agree	Rather agree	Rather disagree	Rather disagree	Rather disagree	Rather disagree	Neither agree or disagree	Disagree	Neither agree or disagree	Neither agree or disagree	Neither agree or disagree	Strongly disagree	Disagree	Rather disagree	Strongly disagree	Strongly disagree	Rather disagree	Disagree	Rather disagree	Neither agree or disagree	Agree	Strongly agree	Strongly agree	Agree	Strongly disagree	Neither agree or disagree	Rather agree	Disagree	Strongly disagree	Strongly agree	Neither agree or disagree	Agree	Disagree	Strongly agree	Rather disagree	Rather agree	Rather agree	Rather agree	Disagree	Strongly disagree	Strongly disagree	Rather agree	Rather agree	Agree
2018-10-29 19:50:03	Strongly disagree	Rather agree	Strongly disagree	Agree	Rather disagree	Agree	Agree	Strongly disagree	Strongly disagree	Strongly disagree	Rather disagree	Neither agree or disagree	Neither agree or disagree	Neither agree or disagree	Neither agree or disagree	Neither agree or disagree	Neither agree or disagree	Neither agree or disagree	Neither agree or disagree	Neither agree or disagree	Neither agree or disagree	Neither agree or disagree	Neither agree or disagree	Neither agree or disagree	Neither agree or disagree	Agree	Rather disagree	Agree	Agree	Rather disagree	Rather agree	Agree	Agree	Disagree	Agree	Neither agree or disagree	Agree	Agree	Agree	Strongly disagree	Agree	Agree	Strongly disagree	Neither agree or disagree	Rather agree	Neither agree or disagree	Strongly agree	Strongly disagree	Agree
2018-10-29 19:50:44	Strongly disagree	Disagree	Strongly disagree	Neither agree or disagree	Rather agree	Rather agree	Rather disagree	Strongly disagree	Strongly disagree	Disagree	Strongly disagree	Strongly disagree	Strongly disagree	Strongly disagree	Strongly disagree	Strongly disagree	Strongly disagree	Strongly disagree	Strongly disagree	Strongly disagree	Strongly disagree	Strongly disagree	Strongly disagree	Strongly disagree	Strongly disagree	Rather agree	Neither agree or disagree	Agree	Agree	Disagree	Rather disagree	Strongly agree	Strongly agree	Strongly disagree	Agree	Neither agree or disagree	Agree	Strongly disagree	Strongly agree	Strongly disagree	Agree	Agree	Disagree	Neither agree or disagree	Disagree	Disagree	Agree	Rather agree	Strongly agree
2018-10-29 19:58:51	Rather disagree	Rather disagree	Disagree	Strongly disagree	Neither agree or disagree	Rather disagree	Strongly disagree	Strongly disagree	Strongly disagree	Strongly disagree	Neither agree or disagree	Neither agree or disagree	Disagree	Strongly disagree	Strongly disagree	Neither agree or disagree	Strongly disagree	Strongly disagree	Strongly disagree	Strongly disagree	Strongly disagree	Disagree	Neither agree or disagree	Neither agree or disagree	Strongly disagree	Strongly agree	Agree	Strongly agree	Strongly agree	Strongly disagree	Rather agree	Strongly agree	Agree	Strongly disagree	Rather agree	Disagree	Rather agree	Strongly disagree	Strongly agree	Disagree	Rather agree	Strongly agree	Disagree	Disagree	Strongly disagree	Strongly disagree	Strongly agree	Rather agree	Strongly agree
2018-10-29 20:06:23	Rather disagree	Rather agree	Rather disagree	Agree	Rather agree	Rather agree	Neither agree or disagree	Disagree	Rather agree	Disagree	Rather disagree	Rather disagree	Rather disagree	Neither agree or disagree	Rather agree	Neither agree or disagree	Rather disagree	Disagree	Strongly disagree	Strongly disagree	Strongly disagree	Strongly disagree	Neither agree or disagree	Disagree	Rather disagree	Agree	Disagree	Strongly agree	Agree	Rather disagree	Disagree	Agree	Disagree	Strongly disagree	Agree	Rather disagree	Agree	Disagree	Agree	Neither agree or disagree	Agree	Rather agree	Disagree	Rather disagree	Disagree	Disagree	Agree	Rather agree	Rather agree
2018-10-29 20:13:20	Neither agree or disagree	Strongly agree	Rather agree	Strongly agree	Agree	Agree	Agree	Neither agree or disagree	Rather disagree	Neither agree or disagree	Neither agree or disagree	Neither agree or disagree	Neither agree or disagree	Neither agree or disagree	Neither agree or disagree	Neither agree or disagree	Neither agree or disagree	Neither agree or disagree	Neither agree or disagree	Neither agree or disagree	Neither agree or disagree	Neither agree or disagree	Neither agree or disagree	Neither agree or disagree	Neither agree or disagree	Rather agree	Rather agree	Rather agree	Agree	Rather disagree	Rather agree	Rather agree	Rather disagree	Rather disagree	Agree	Rather agree	Rather agree	Neither agree or disagree	Neither agree or disagree	Neither agree or disagree	Neither agree or disagree	Rather agree	Neither agree or disagree	Neither agree or disagree	Neither agree or disagree	Rather disagree	Neither agree or disagree	Rather agree	Rather agree
2018-10-29 20:43:38	Rather agree	Agree	Neither agree or disagree	Rather agree	Agree	Agree	Agree	Disagree	Rather agree	Neither agree or disagree	Disagree	Rather disagree	Strongly disagree	Rather disagree	Strongly disagree	Strongly disagree	Strongly disagree	Strongly disagree	Strongly disagree	Strongly disagree	Strongly disagree	Strongly disagree	Strongly disagree	Strongly disagree	Strongly disagree	Strongly agree	Strongly disagree	Agree	Strongly agree	Strongly disagree	Strongly disagree	Strongly agree	Agree	Strongly disagree	Strongly agree	Rather agree	Strongly agree	Strongly disagree	Strongly agree	Neither agree or disagree	Strongly agree	Strongly agree	Rather disagree	Disagree	Strongly disagree	Strongly disagree	Agree	Rather agree	Strongly agree
2018-10-29 20:45:48	Strongly disagree	Strongly disagree	Strongly agree	Agree	Rather agree	Agree	Neither agree or disagree	Disagree	Rather agree	Rather agree	Neither agree or disagree	Rather agree	Neither agree or disagree	Disagree	Neither agree or disagree	Strongly disagree	Strongly disagree	Strongly disagree	Strongly disagree	Strongly disagree	Strongly disagree	Strongly disagree	Strongly disagree	Strongly disagree	Strongly disagree	Rather agree	Agree	Agree	Rather agree	Rather agree	Strongly agree	Strongly agree	Neither agree or disagree	Strongly disagree	Rather agree	Rather disagree	Strongly agree	Strongly disagree	Strongly agree	Neither agree or disagree	Neither agree or disagree	Rather disagree	Neither agree or disagree	Neither agree or disagree	Disagree	Disagree	Rather agree	Strongly disagree	Strongly agree
2018-10-29 20:47:11	Rather agree	Rather agree	Neither agree or disagree	Agree	Rather agree	Agree	Agree	Neither agree or disagree	Rather disagree	Disagree	Rather agree	Rather agree	Neither agree or disagree	Neither agree or disagree	Rather agree	Rather agree	Neither agree or disagree	Disagree	Rather disagree	Rather disagree	Rather disagree	Disagree	Neither agree or disagree	Rather disagree	Neither agree or disagree	Rather agree	Disagree	Agree	Agree	Disagree	Rather disagree	Rather agree	Neither agree or disagree	Disagree	Agree	Neither agree or disagree	Agree	Rather disagree	Agree	Rather disagree	Agree	Agree	Rather agree	Neither agree or disagree	Neither agree or disagree	Rather disagree	Rather agree	Strongly disagree	Agree
2018-10-29 21:01:00	Rather disagree	Rather disagree	Neither agree or disagree	Neither agree or disagree	Agree	Agree	Rather agree	Disagree	Rather disagree	Rather agree	Rather disagree	Neither agree or disagree	Neither agree or disagree	Rather agree	Rather agree	Rather agree	Neither agree or disagree	Neither agree or disagree	Strongly disagree	Neither agree or disagree	Neither agree or disagree	Neither agree or disagree	Neither agree or disagree	Neither agree or disagree	Neither agree or disagree	Rather agree	Rather disagree	Rather agree	Rather agree	Rather agree	Rather agree	Rather agree	Rather agree	Rather disagree	Rather agree	Rather agree	Rather agree	Rather agree	Rather agree	Rather agree	Rather agree	Rather agree	Rather agree	Rather agree	Neither agree or disagree	Rather agree	Rather agree	Rather agree	Rather agree
2018-10-29 21:31:46	Strongly disagree	Neither agree or disagree	Agree	Strongly disagree	Rather agree	Strongly agree	Strongly disagree	Neither agree or disagree	Strongly agree	Strongly disagree	Agree	Rather agree	Rather disagree	Neither agree or disagree	Strongly agree	Strongly disagree	Rather disagree	Rather agree	Disagree	Rather disagree	Agree	Disagree	Disagree	Agree	Strongly disagree	Neither agree or disagree	Strongly agree	Strongly disagree	Neither agree or disagree	Strongly agree	Disagree	Agree	Disagree	Strongly agree	Strongly agree	Strongly disagree	Agree	Strongly agree	Strongly disagree	Neither agree or disagree	Strongly agree	Rather agree	Strongly disagree	Strongly disagree	Strongly disagree	Strongly disagree	Strongly disagree	Strongly agree	Strongly agree
2018-10-29 22:05:00	Strongly disagree	Neither agree or disagree	Rather disagree	Rather agree	Agree	Agree	Rather disagree	Strongly agree	Rather agree	Rather disagree	Disagree	Rather agree	Neither agree or disagree	Strongly disagree	Rather agree	Neither agree or disagree	Neither agree or disagree	Neither agree or disagree	Strongly disagree	Disagree	Disagree	Disagree	Neither agree or disagree	Disagree	Disagree	Rather disagree	Rather agree	Rather agree	Strongly agree	Rather disagree	Rather agree	Agree	Strongly agree	Disagree	Rather agree	Strongly disagree	Rather agree	Rather disagree	Strongly agree	Rather agree	Rather agree	Strongly agree	Rather agree	Strongly agree	Strongly agree	Neither agree or disagree	Agree	Strongly disagree	Agree
2018-10-29 22:08:30	Strongly agree	Agree	Rather agree	Strongly agree	Strongly agree	Strongly agree	Agree	Agree	Rather agree	Rather disagree	Rather agree	Strongly agree	Agree	Strongly agree	Strongly agree	Strongly agree	Rather disagree	Rather disagree	Disagree	Rather disagree	Rather disagree	Rather disagree	Rather agree	Rather agree	Rather agree	Rather agree	Disagree	Strongly agree	Strongly agree	Rather disagree	Rather disagree	Strongly agree	Rather agree	Strongly disagree	Strongly agree	Rather disagree	Strongly agree	Disagree	Strongly agree	Rather disagree	Strongly agree	Agree	Rather disagree	Rather disagree	Strongly disagree	Rather disagree	Strongly agree	Rather disagree	Strongly agree
2018-10-29 22:13:56	Strongly disagree	Strongly disagree	Strongly disagree	Strongly disagree	Rather agree	Strongly disagree	Strongly disagree	Strongly disagree	Strongly disagree	Strongly disagree	Strongly disagree	Strongly disagree	Strongly disagree	Strongly disagree	Strongly disagree	Strongly disagree	Strongly disagree	Strongly disagree	Strongly disagree	Strongly disagree	Strongly disagree	Strongly disagree	Strongly disagree	Strongly disagree	Strongly disagree	Rather agree	Disagree	Agree	Rather agree	Rather disagree	Rather disagree	Agree	Strongly agree	Strongly disagree	Rather agree	Strongly agree	Agree	Rather disagree	Agree	Strongly agree	Strongly agree	Rather agree	Rather disagree	Strongly disagree	Rather disagree	Rather agree	Rather agree	Strongly agree	Strongly agree
2018-10-29 22:28:17	Disagree	Strongly disagree	Strongly disagree	Strongly disagree	Rather disagree	Rather disagree	Strongly disagree	Strongly disagree	Strongly disagree	Strongly disagree	Strongly disagree	Strongly disagree	Strongly disagree	Neither agree or disagree	Neither agree or disagree	Neither agree or disagree	Strongly disagree	Strongly disagree	Strongly disagree	Neither agree or disagree	Neither agree or disagree	Neither agree or disagree	Neither agree or disagree	Neither agree or disagree	Neither agree or disagree	Rather agree	Strongly agree	Strongly agree	Rather disagree	Strongly agree	Strongly agree	Rather agree	Strongly agree	Rather disagree	Disagree	Agree	Strongly agree	Agree	Rather disagree	Strongly agree	Rather agree	Rather agree	Strongly agree	Strongly agree	Strongly disagree	Agree	Rather agree	Strongly agree	Strongly agree
2018-10-29 22:28:21	Strongly disagree	Neither agree or disagree	Rather disagree	Rather agree	Neither agree or disagree	Neither agree or disagree	Rather disagree	Strongly disagree	Strongly disagree	Strongly disagree	Rather agree	Rather agree	Neither agree or disagree	Neither agree or disagree	Neither agree or disagree	Neither agree or disagree	Rather disagree	Disagree	Strongly disagree	Strongly disagree	Neither agree or disagree	Neither agree or disagree	Neither agree or disagree	Neither agree or disagree	Neither agree or disagree	Agree	Disagree	Agree	Rather agree	Disagree	Disagree	Agree	Disagree	Strongly disagree	Strongly agree	Disagree	Agree	Strongly disagree	Strongly agree	Disagree	Strongly agree	Agree	Disagree	Disagree	Disagree	Rather disagree	Strongly agree	Strongly disagree	Strongly agree
2018-10-29 22:41:07	Rather disagree	Agree	Strongly disagree	Rather agree	Rather agree	Rather agree	Disagree	Rather agree	Rather agree	Rather disagree	Rather disagree	Neither agree or disagree	Rather agree	Neither agree or disagree	Neither agree or disagree	Neither agree or disagree	Strongly disagree	Disagree	Neither agree or disagree	Strongly disagree	Rather disagree	Rather disagree	Rather disagree	Disagree	Disagree	Agree	Rather disagree	Agree	Rather disagree	Rather disagree	Neither agree or disagree	Agree	Rather agree	Strongly disagree	Rather agree	Strongly disagree	Rather agree	Rather disagree	Agree	Disagree	Rather agree	Rather agree	Agree	Strongly disagree	Strongly disagree	Rather disagree	Strongly agree	Strongly disagree	Strongly agree
2018-10-29 23:09:23	Rather agree	Agree	Rather agree	Strongly agree	Agree	Rather agree	Rather agree	Strongly disagree	Rather disagree	Rather disagree	Rather disagree	Rather agree	Rather disagree	Agree	Rather agree	Rather agree	Strongly disagree	Strongly disagree	Strongly disagree	Strongly disagree	Strongly disagree	Strongly disagree	Strongly disagree	Strongly disagree	Rather agree	Strongly agree	Rather disagree	Strongly agree	Strongly agree	Strongly disagree	Rather disagree	Strongly agree	Strongly agree	Strongly disagree	Strongly agree	Disagree	Strongly agree	Strongly disagree	Strongly agree	Rather agree	Strongly agree	Strongly agree	Disagree	Rather disagree	Disagree	Strongly disagree	Strongly agree	Strongly disagree	Strongly agree
2018-10-30 03:50:30	Rather disagree	Disagree	Disagree	Rather disagree	Neither agree or disagree	Rather agree	Rather agree	Strongly agree	Rather agree	Rather agree	Neither agree or disagree	Rather agree	Neither agree or disagree	Neither agree or disagree	Neither agree or disagree	Neither agree or disagree	Neither agree or disagree	Disagree	Strongly disagree	Rather disagree	Rather disagree	Rather disagree	Neither agree or disagree	Neither agree or disagree	Rather agree	Rather agree	Rather agree	Rather agree	Rather agree	Rather disagree	Rather disagree	Rather agree	Neither agree or disagree	Rather disagree	Rather agree	Rather agree	Rather agree	Rather disagree	Agree	Neither agree or disagree	Rather agree	Rather disagree	Rather disagree	Rather disagree	Disagree	Rather disagree	Rather agree	Rather disagree	Rather agree
2018-10-30 08:15:39	Neither agree or disagree	Rather agree	Rather agree	Agree	Strongly agree	Agree	Rather agree	Rather disagree	Rather disagree	Strongly disagree	Rather disagree	Neither agree or disagree	Strongly disagree	Disagree	Disagree	Neither agree or disagree	Strongly disagree	Disagree	Strongly disagree	Disagree	Strongly disagree	Strongly disagree	Strongly disagree	Strongly disagree	Strongly disagree	Agree	Disagree	Strongly agree	Strongly agree	Strongly disagree	Strongly disagree	Strongly agree	Rather disagree	Strongly disagree	Strongly agree	Rather disagree	Strongly agree	Rather disagree	Agree	Neither agree or disagree	Agree	Rather disagree	Rather agree	Disagree	Neither agree or disagree	Rather agree	Strongly agree	Disagree	Strongly agree
2018-10-30 09:41:08	Strongly disagree	Strongly disagree	Strongly disagree	Strongly disagree	Neither agree or disagree	Rather agree	Neither agree or disagree	Strongly disagree	Disagree	Strongly disagree	Strongly disagree	Strongly disagree	Strongly disagree	Strongly disagree	Strongly disagree	Strongly disagree	Strongly disagree	Strongly disagree	Strongly disagree	Strongly disagree	Strongly disagree	Strongly disagree	Strongly disagree	Strongly disagree	Strongly disagree	Rather agree	Rather agree	Rather agree	Rather agree	Rather disagree	Neither agree or disagree	Agree	Rather agree	Disagree	Rather agree	Neither agree or disagree	Rather agree	Neither agree or disagree	Agree	Neither agree or disagree	Rather agree	Agree	Rather disagree	Rather disagree	Rather disagree	Rather disagree	Rather agree	Disagree	Strongly agree
2018-10-30 10:45:20	Rather disagree	Rather agree	Rather agree	Agree	Agree	Agree	Agree	Rather agree	Agree	Rather agree	Rather agree	Agree	Neither agree or disagree	Neither agree or disagree	Rather agree	Neither agree or disagree	Neither agree or disagree	Neither agree or disagree	Strongly disagree	Rather disagree	Strongly disagree	Strongly disagree	Neither agree or disagree	Neither agree or disagree	Neither agree or disagree	Rather agree	Agree	Rather agree	Rather agree	Rather disagree	Agree	Rather agree	Agree	Rather agree	Rather disagree	Agree	Rather disagree	Rather disagree	Rather disagree	Agree	Rather disagree	Rather agree	Rather disagree	Rather disagree	Rather disagree	Rather agree	Rather disagree	Rather agree	Rather agree
2018-10-30 10:54:34	Rather disagree	Neither agree or disagree	Rather agree	Agree	Rather agree	Rather agree	Rather agree	Rather disagree	Rather agree	Neither agree or disagree	Agree	Rather agree	Rather agree	Disagree	Disagree	Neither agree or disagree	Strongly disagree	Strongly disagree	Disagree	Strongly disagree	Strongly disagree	Strongly disagree	Strongly disagree	Strongly disagree	Strongly disagree	Rather disagree	Rather agree	Rather agree	Rather agree	Rather disagree	Rather agree	Neither agree or disagree	Agree	Rather disagree	Rather disagree	Agree	Rather agree	Rather agree	Agree	Agree	Rather agree	Rather agree	Disagree	Rather agree	Rather disagree	Rather disagree	Rather agree	Agree	Agree
2018-10-30 11:11:06	Rather disagree	Rather disagree	Rather disagree	Rather agree	Rather agree	Agree	Rather agree	Rather agree	Rather agree	Neither agree or disagree	Rather agree	Rather agree	Neither agree or disagree	Neither agree or disagree	Rather agree	Neither agree or disagree	Neither agree or disagree	Neither agree or disagree	Rather agree	Rather disagree	Disagree	Rather disagree	Neither agree or disagree	Neither agree or disagree	Rather agree	Rather agree	Rather agree	Rather agree	Rather disagree	Neither agree or disagree	Rather agree	Neither agree or disagree	Agree	Neither agree or disagree	Rather disagree	Agree	Agree	Rather disagree	Rather agree	Neither agree or disagree	Rather agree	Rather disagree	Neither agree or disagree	Rather agree	Disagree	Rather agree	Neither agree or disagree	Rather disagree	Agree
2018-10-30 11:18:50	Neither agree or disagree	Agree	Rather disagree	Rather agree	Agree	Agree	Rather agree	Disagree	Strongly disagree	Strongly disagree	Neither agree or disagree	Rather agree	Rather disagree	Disagree	Disagree	Strongly disagree	Strongly disagree	Strongly disagree	Strongly disagree	Strongly disagree	Strongly disagree	Strongly disagree	Strongly disagree	Strongly disagree	Strongly disagree	Rather agree	Rather agree	Agree	Agree	Rather disagree	Agree	Agree	Agree	Strongly disagree	Agree	Rather agree	Agree	Rather disagree	Agree	Neither agree or disagree	Rather agree	Agree	Rather disagree	Rather disagree	Strongly disagree	Rather agree	Agree	Rather agree	Agree
2018-10-30 11:23:02	Rather disagree	Rather agree	Neither agree or disagree	Agree	Agree	Agree	Rather agree	Rather disagree	Neither agree or disagree	Disagree	Rather disagree	Agree	Neither agree or disagree	Neither agree or disagree	Neither agree or disagree	Neither agree or disagree	Disagree	Neither agree or disagree	Disagree	Strongly disagree	Strongly disagree	Rather disagree	Neither agree or disagree	Neither agree or disagree	Neither agree or disagree	Rather agree	Neither agree or disagree	Rather agree	Rather agree	Neither agree or disagree	Neither agree or disagree	Rather agree	Rather disagree	Rather disagree	Rather agree	Rather agree	Rather agree	Rather disagree	Rather agree	Rather agree	Rather agree	Rather agree	Neither agree or disagree	Rather disagree	Rather disagree	Neither agree or disagree	Rather disagree	Agree	Rather agree
2018-10-30 11:25:13	Neither agree or disagree	Rather disagree	Rather disagree	Rather disagree	Neither agree or disagree	Rather agree	Rather agree	Strongly disagree	Rather disagree	Strongly disagree	Neither agree or disagree	Rather disagree	Rather disagree	Strongly disagree	Strongly disagree	Strongly disagree	Strongly disagree	Strongly disagree	Strongly disagree	Strongly disagree	Strongly disagree	Strongly disagree	Strongly disagree	Strongly disagree	Strongly disagree	Rather agree	Neither agree or disagree	Agree	Strongly agree	Strongly disagree	Rather disagree	Rather agree	Rather disagree	Strongly disagree	Rather agree	Neither agree or disagree	Strongly agree	Rather disagree	Rather agree	Strongly agree	Strongly agree	Strongly agree	Neither agree or disagree	Strongly disagree	Strongly disagree	Rather disagree	Strongly agree	Rather agree	Strongly agree
2018-10-30 11:27:18	Rather agree	Rather agree	Neither agree or disagree	Neither agree or disagree	Agree	Rather agree	Neither agree or disagree	Strongly disagree	Rather disagree	Strongly disagree	Strongly disagree	Strongly disagree	Strongly disagree	Strongly disagree	Strongly disagree	Strongly disagree	Strongly disagree	Strongly disagree	Strongly disagree	Strongly disagree	Strongly disagree	Strongly disagree	Strongly disagree	Strongly disagree	Strongly disagree	Rather agree	Rather agree	Rather agree	Rather agree	Rather agree	Neither agree or disagree	Neither agree or disagree	Strongly disagree	Neither agree or disagree	Neither agree or disagree	Neither agree or disagree	Neither agree or disagree	Strongly disagree	Strongly disagree	Strongly disagree	Strongly disagree	Strongly disagree	Disagree	Strongly disagree	Strongly disagree	Rather disagree	Rather agree	Neither agree or disagree	Disagree
2018-10-30 11:37:06	Strongly agree	Strongly agree	Rather disagree	Rather disagree	Rather agree	Rather agree	Rather agree	Rather disagree	Rather agree	Rather agree	Rather agree	Neither agree or disagree	Rather agree	Rather disagree	Neither agree or disagree	Rather agree	Rather agree	Neither agree or disagree	Rather agree	Disagree	Neither agree or disagree	Neither agree or disagree	Rather agree	Neither agree or disagree	Rather agree	Agree	Rather agree	Rather disagree	Rather agree	Neither agree or disagree	Neither agree or disagree	Neither agree or disagree	Neither agree or disagree	Rather disagree	Rather agree	Neither agree or disagree	Neither agree or disagree	Neither agree or disagree	Rather agree	Rather disagree	Rather disagree	Neither agree or disagree	Rather disagree	Rather disagree	Neither agree or disagree	Disagree	Agree	Neither agree or disagree	Rather agree
2018-10-30 12:09:44	Rather disagree	Rather agree	Rather disagree	Rather agree	Strongly agree	Rather agree	Rather disagree	Strongly disagree	Strongly disagree	Strongly disagree	Disagree	Neither agree or disagree	Neither agree or disagree	Strongly disagree	Strongly disagree	Disagree	Disagree	Strongly disagree	Strongly disagree	Strongly disagree	Neither agree or disagree	Neither agree or disagree	Neither agree or disagree	Neither agree or disagree	Neither agree or disagree	Rather agree	Neither agree or disagree	Strongly agree	Strongly agree	Rather disagree	Neither agree or disagree	Rather agree	Rather disagree	Strongly disagree	Rather agree	Neither agree or disagree	Agree	Rather agree	Rather disagree	Rather agree	Rather agree	Rather agree	Disagree	Rather disagree	Disagree	Neither agree or disagree	Rather agree	Rather agree	Rather agree
2018-10-30 12:25:02	Strongly disagree	Strongly disagree	Strongly disagree	Strongly disagree	Strongly disagree	Strongly disagree	Strongly disagree	Strongly disagree	Strongly disagree	Strongly disagree	Strongly disagree	Strongly disagree	Strongly disagree	Strongly disagree	Strongly disagree	Strongly disagree	Strongly disagree	Strongly disagree	Strongly disagree	Strongly disagree	Strongly disagree	Strongly disagree	Strongly disagree	Strongly disagree	Strongly disagree	Rather agree	Rather agree	Strongly agree	Rather agree	Disagree	Rather disagree	Strongly agree	Rather disagree	Strongly disagree	Rather agree	Rather agree	Agree	Rather disagree	Rather agree	Rather agree	Rather agree	Agree	Rather agree	Rather disagree	Disagree	Rather disagree	Strongly agree	Strongly disagree	Strongly agree
2018-10-30 12:40:28	Strongly disagree	Strongly disagree	Strongly disagree	Rather agree	Strongly disagree	Strongly disagree	Strongly disagree	Strongly disagree	Strongly disagree	Strongly disagree	Neither agree or disagree	Rather disagree	Rather disagree	Strongly disagree	Strongly disagree	Neither agree or disagree	Strongly disagree	Strongly disagree	Strongly disagree	Strongly disagree	Strongly disagree	Strongly disagree	Strongly disagree	Strongly disagree	Strongly disagree	Rather agree	Rather disagree	Agree	Agree	Rather disagree	Rather disagree	Agree	Disagree	Strongly disagree	Rather agree	Rather disagree	Rather agree	Disagree	Rather agree	Rather disagree	Rather agree	Rather agree	Rather disagree	Rather disagree	Disagree	Disagree	Rather agree	Strongly disagree	Agree
2018-10-30 12:58:35	Disagree	Disagree	Rather disagree	Rather agree	Neither agree or disagree	Rather agree	Rather disagree	Rather disagree	Rather disagree	Neither agree or disagree	Strongly disagree	Neither agree or disagree	Disagree	Disagree	Rather disagree	Disagree	Disagree	Disagree	Disagree	Disagree	Disagree	Disagree	Disagree	Disagree	Neither agree or disagree	Strongly agree	Rather agree	Strongly agree	Strongly agree	Strongly disagree	Rather disagree	Strongly agree	Strongly disagree	Strongly disagree	Agree	Rather agree	Rather agree	Strongly disagree	Rather agree	Rather disagree	Agree	Agree	Disagree	Strongly disagree	Disagree	Disagree	Strongly agree	Disagree	Strongly agree
2018-10-30 13:15:48	Rather disagree	Neither agree or disagree	Neither agree or disagree	Neither agree or disagree	Rather agree	Rather agree	Rather disagree	Strongly disagree	Rather disagree	Strongly disagree	Rather agree	Neither agree or disagree	Neither agree or disagree	Neither agree or disagree	Neither agree or disagree	Neither agree or disagree	Neither agree or disagree	Neither agree or disagree	Neither agree or disagree	Neither agree or disagree	Neither agree or disagree	Neither agree or disagree	Neither agree or disagree	Neither agree or disagree	Neither agree or disagree	Strongly agree	Strongly disagree	Strongly agree	Strongly agree	Strongly disagree	Strongly disagree	Strongly agree	Rather disagree	Strongly disagree	Strongly agree	Strongly disagree	Strongly agree	Strongly disagree	Rather agree	Strongly disagree	Strongly agree	Strongly agree	Strongly disagree	Strongly disagree	Strongly disagree	Strongly disagree	Strongly agree	Strongly disagree	Strongly agree
2018-10-30 13:40:16	Rather disagree	Strongly disagree	Strongly disagree	Strongly disagree	Neither agree or disagree	Rather agree	Strongly disagree	Strongly disagree	Strongly disagree	Strongly disagree	Strongly disagree	Strongly disagree	Strongly disagree	Strongly disagree	Strongly disagree	Strongly disagree	Strongly disagree	Strongly disagree	Strongly disagree	Strongly disagree	Neither agree or disagree	Neither agree or disagree	Neither agree or disagree	Neither agree or disagree	Strongly disagree	Agree	Disagree	Agree	Agree	Disagree	Disagree	Agree	Rather disagree	Strongly disagree	Agree	Disagree	Agree	Rather disagree	Strongly agree	Rather disagree	Agree	Rather agree	Disagree	Disagree	Disagree	Disagree	Agree	Disagree	Strongly agree
2018-10-30 13:49:48	Rather disagree	Strongly disagree	Rather disagree	Agree	Neither agree or disagree	Rather agree	Rather agree	Rather disagree	Rather agree	Disagree	Strongly disagree	Disagree	Strongly disagree	Strongly disagree	Rather disagree	Rather disagree	Disagree	Strongly disagree	Disagree	Disagree	Disagree	Strongly disagree	Strongly disagree	Strongly disagree	Strongly disagree	Rather agree	Neither agree or disagree	Strongly agree	Strongly agree	Neither agree or disagree	Rather agree	Rather agree	Rather disagree	Rather disagree	Rather agree	Rather agree	Rather agree	Rather agree	Rather agree	Rather agree	Neither agree or disagree	Rather disagree	Rather disagree	Rather agree	Disagree	Rather agree	Neither agree or disagree	Rather agree	Rather agree
2018-10-30 14:08:40	Strongly agree	Neither agree or disagree	Agree	Agree	Strongly agree	Strongly agree	Strongly agree	Strongly disagree	Strongly agree	Strongly disagree	Rather disagree	Rather disagree	Rather disagree	Strongly disagree	Strongly disagree	Neither agree or disagree	Strongly disagree	Strongly disagree	Strongly disagree	Strongly disagree	Strongly disagree	Strongly disagree	Neither agree or disagree	Neither agree or disagree	Strongly disagree	Neither agree or disagree	Rather disagree	Rather agree	Strongly agree	Rather disagree	Rather disagree	Rather agree	Neither agree or disagree	Strongly disagree	Agree	Rather disagree	Rather agree	Rather disagree	Rather agree	Rather agree	Rather agree	Rather agree	Rather disagree	Rather disagree	Rather disagree	Rather disagree	Rather agree	Rather agree	Rather agree
2018-10-30 14:36:52	Rather disagree	Rather disagree	Disagree	Rather agree	Agree	Agree	Rather agree	Disagree	Rather agree	Strongly disagree	Strongly disagree	Disagree	Disagree	Disagree	Disagree	Disagree	Disagree	Disagree	Disagree	Disagree	Disagree	Disagree	Disagree	Disagree	Disagree	Rather agree	Rather agree	Agree	Agree	Rather disagree	Rather agree	Rather agree	Rather agree	Disagree	Rather agree	Neither agree or disagree	Agree	Neither agree or disagree	Rather agree	Neither agree or disagree	Rather agree	Agree	Neither agree or disagree	Rather disagree	Rather disagree	Neither agree or disagree	Rather agree	Rather agree	Agree
2018-10-30 15:11:31	Neither agree or disagree	Strongly agree	Strongly agree	Strongly agree	Agree	Agree	Agree	Strongly disagree	Strongly disagree	Agree	Rather agree	Rather agree	Rather agree	Agree	Agree	Agree	Disagree	Disagree	Strongly disagree	Strongly disagree	Strongly disagree	Strongly disagree	Rather agree	Disagree	Rather agree	Agree	Strongly disagree	Agree	Agree	Strongly disagree	Strongly disagree	Rather agree	Rather agree	Strongly disagree	Agree	Strongly disagree	Rather agree	Strongly disagree	Rather agree	Strongly disagree	Agree	Agree	Strongly disagree	Strongly disagree	Strongly disagree	Disagree	Rather agree	Strongly disagree	Rather agree
2018-10-30 15:13:46	Rather disagree	Rather agree	Rather agree	Rather agree	Rather agree	Agree	Agree	Disagree	Disagree	Disagree	Neither agree or disagree	Rather agree	Agree	Agree	Agree	Agree	Rather disagree	Disagree	Rather disagree	Rather disagree	Rather disagree	Rather disagree	Agree	Agree	Agree	Agree	Strongly disagree	Rather agree	Rather agree	Disagree	Disagree	Agree	Rather agree	Strongly disagree	Rather agree	Strongly disagree	Agree	Strongly disagree	Agree	Strongly disagree	Agree	Strongly agree	Strongly disagree	Strongly disagree	Strongly disagree	Strongly disagree	Strongly agree	Strongly disagree	Strongly agree
2018-10-30 15:16:11	Disagree	Strongly agree	Strongly agree	Strongly agree	Strongly agree	Strongly agree	Strongly agree	Strongly agree	Strongly agree	Strongly agree	Strongly agree	Strongly agree	Strongly agree	Strongly agree	Strongly agree	Strongly agree	Neither agree or disagree	Neither agree or disagree	Strongly disagree	Strongly disagree	Strongly disagree	Strongly disagree	Strongly agree	Strongly agree	Strongly agree	Strongly agree	Strongly disagree	Strongly agree	Strongly agree	Strongly disagree	Strongly disagree	Strongly agree	Strongly disagree	Strongly disagree	Strongly agree	Strongly disagree	Strongly agree	Strongly disagree	Strongly agree	Strongly disagree	Strongly agree	Strongly agree	Strongly disagree	Strongly disagree	Strongly disagree	Strongly disagree	Strongly agree	Strongly disagree	Strongly agree
2018-10-30 15:18:33	Rather disagree	Rather disagree	Rather disagree	Strongly agree	Strongly agree	Strongly agree	Strongly agree	Strongly disagree	Strongly disagree	Strongly disagree	Rather agree	Rather agree	Rather agree	Rather agree	Rather agree	Rather agree	Strongly disagree	Strongly disagree	Strongly disagree	Strongly disagree	Strongly disagree	Strongly disagree	Strongly disagree	Strongly disagree	Strongly disagree	Rather agree	Strongly disagree	Agree	Rather agree	Strongly disagree	Strongly disagree	Rather agree	Strongly disagree	Strongly disagree	Rather agree	Strongly disagree	Agree	Strongly disagree	Agree	Strongly disagree	Agree	Agree	Strongly disagree	Strongly disagree	Strongly disagree	Strongly disagree	Agree	Strongly disagree	Rather agree
2018-10-30 15:21:16	Rather disagree	Rather disagree	Rather disagree	Rather disagree	Rather disagree	Rather agree	Rather agree	Rather disagree	Rather disagree	Rather disagree	Rather agree	Strongly agree	Strongly agree	Strongly agree	Strongly agree	Strongly agree	Strongly disagree	Strongly disagree	Strongly disagree	Strongly disagree	Strongly disagree	Strongly disagree	Strongly disagree	Strongly disagree	Strongly disagree	Rather agree	Disagree	Agree	Agree	Disagree	Disagree	Agree	Disagree	Strongly disagree	Agree	Disagree	Agree	Disagree	Agree	Disagree	Agree	Agree	Disagree	Disagree	Disagree	Disagree	Agree	Strongly disagree	Agree
2018-10-30 15:24:16	Rather disagree	Agree	Agree	Agree	Agree	Agree	Agree	Agree	Disagree	Agree	Agree	Agree	Agree	Neither agree or disagree	Neither agree or disagree	Neither agree or disagree	Neither agree or disagree	Neither agree or disagree	Neither agree or disagree	Neither agree or disagree	Neither agree or disagree	Neither agree or disagree	Neither agree or disagree	Neither agree or disagree	Neither agree or disagree	Agree	Strongly disagree	Agree	Strongly agree	Strongly disagree	Strongly disagree	Strongly agree	Strongly disagree	Strongly disagree	Strongly agree	Strongly disagree	Agree	Strongly disagree	Agree	Strongly disagree	Agree	Agree	Strongly disagree	Strongly disagree	Strongly disagree	Disagree	Agree	Disagree	Rather agree
2018-10-30 15:26:16	Strongly disagree	Strongly disagree	Strongly disagree	Strongly disagree	Strongly disagree	Rather agree	Rather agree	Strongly disagree	Strongly disagree	Strongly disagree	Neither agree or disagree	Neither agree or disagree	Neither agree or disagree	Neither agree or disagree	Neither agree or disagree	Neither agree or disagree	Neither agree or disagree	Neither agree or disagree	Neither agree or disagree	Neither agree or disagree	Neither agree or disagree	Neither agree or disagree	Neither agree or disagree	Neither agree or disagree	Neither agree or disagree	Strongly agree	Strongly disagree	Strongly agree	Strongly agree	Strongly disagree	Strongly disagree	Strongly agree	Strongly disagree	Strongly disagree	Strongly agree	Strongly disagree	Strongly agree	Strongly disagree	Strongly agree	Strongly disagree	Strongly agree	Strongly agree	Strongly disagree	Strongly disagree	Strongly disagree	Strongly disagree	Strongly agree	Strongly disagree	Strongly agree
2018-10-30 15:28:50	Disagree	Rather agree	Rather agree	Rather agree	Rather agree	Rather agree	Rather agree	Strongly disagree	Strongly disagree	Rather agree	Rather agree	Rather agree	Rather agree	Rather agree	Rather agree	Rather agree	Neither agree or disagree	Neither agree or disagree	Neither agree or disagree	Neither agree or disagree	Neither agree or disagree	Neither agree or disagree	Neither agree or disagree	Neither agree or disagree	Neither agree or disagree	Agree	Strongly disagree	Rather agree	Rather agree	Strongly disagree	Strongly disagree	Rather agree	Strongly disagree	Strongly disagree	Rather agree	Strongly disagree	Agree	Strongly disagree	Agree	Strongly disagree	Agree	Agree	Strongly disagree	Disagree	Strongly disagree	Strongly disagree	Rather agree	Strongly disagree	Rather agree
2018-10-30 15:30:51	Rather disagree	Rather agree	Rather agree	Rather agree	Rather agree	Rather agree	Rather agree	Disagree	Disagree	Disagree	Rather agree	Rather agree	Rather agree	Rather agree	Neither agree or disagree	Agree	Neither agree or disagree	Neither agree or disagree	Rather disagree	Rather disagree	Neither agree or disagree	Rather disagree	Rather agree	Neither agree or disagree	Neither agree or disagree	Strongly agree	Strongly disagree	Strongly agree	Strongly agree	Strongly disagree	Strongly disagree	Strongly agree	Strongly disagree	Strongly disagree	Strongly agree	Strongly disagree	Strongly agree	Strongly disagree	Strongly agree	Strongly disagree	Strongly agree	Strongly agree	Strongly disagree	Strongly disagree	Strongly disagree	Strongly disagree	Strongly agree	Strongly disagree	Strongly agree
2018-10-30 15:32:49	Rather disagree	Strongly agree	Strongly agree	Strongly agree	Strongly agree	Strongly agree	Strongly agree	Strongly disagree	Strongly agree	Strongly agree	Agree	Strongly agree	Strongly agree	Strongly agree	Strongly agree	Strongly agree	Rather disagree	Rather disagree	Neither agree or disagree	Rather agree	Rather agree	Rather agree	Rather agree	Neither agree or disagree	Neither agree or disagree	Agree	Strongly disagree	Agree	Rather agree	Strongly disagree	Strongly disagree	Rather agree	Strongly disagree	Strongly disagree	Strongly agree	Strongly disagree	Rather agree	Strongly disagree	Rather agree	Strongly disagree	Agree	Agree	Strongly disagree	Strongly disagree	Strongly disagree	Strongly disagree	Rather agree	Strongly disagree	Agree
2018-10-30 15:34:54	Strongly disagree	Neither agree or disagree	Neither agree or disagree	Rather agree	Rather agree	Rather agree	Rather agree	Disagree	Disagree	Rather disagree	Rather agree	Rather agree	Neither agree or disagree	Neither agree or disagree	Neither agree or disagree	Neither agree or disagree	Neither agree or disagree	Neither agree or disagree	Neither agree or disagree	Neither agree or disagree	Neither agree or disagree	Neither agree or disagree	Neither agree or disagree	Neither agree or disagree	Neither agree or disagree	Rather agree	Strongly disagree	Rather agree	Rather agree	Strongly disagree	Strongly disagree	Rather agree	Strongly disagree	Strongly disagree	Strongly agree	Strongly disagree	Strongly agree	Strongly disagree	Strongly agree	Strongly disagree	Strongly agree	Strongly agree	Strongly disagree	Strongly disagree	Strongly disagree	Strongly disagree	Agree	Strongly disagree	Rather agree
2018-10-30 15:38:34	Strongly disagree	Strongly disagree	Disagree	Strongly disagree	Disagree	Rather agree	Strongly disagree	Disagree	Disagree	Disagree	Neither agree or disagree	Neither agree or disagree	Neither agree or disagree	Disagree	Neither agree or disagree	Neither agree or disagree	Neither agree or disagree	Neither agree or disagree	Neither agree or disagree	Neither agree or disagree	Neither agree or disagree	Neither agree or disagree	Neither agree or disagree	Neither agree or disagree	Neither agree or disagree	Agree	Disagree	Agree	Agree	Disagree	Disagree	Agree	Strongly disagree	Strongly disagree	Agree	Strongly disagree	Agree	Strongly disagree	Agree	Strongly disagree	Rather agree	Rather agree	Disagree	Disagree	Disagree	Disagree	Rather agree	Disagree	Rather agree
2018-10-30 16:19:13	Rather agree	Agree	Agree	Neither agree or disagree	Strongly agree	Rather agree	Strongly disagree	Strongly disagree	Strongly disagree	Strongly disagree	Rather agree	Rather agree	Agree	Strongly disagree	Strongly disagree	Strongly disagree	Strongly disagree	Strongly disagree	Strongly disagree	Strongly disagree	Strongly disagree	Strongly disagree	Strongly disagree	Strongly disagree	Strongly disagree	Strongly agree	Strongly disagree	Strongly agree	Strongly agree	Strongly disagree	Rather agree	Strongly agree	Strongly agree	Strongly disagree	Strongly agree	Strongly disagree	Strongly agree	Strongly disagree	Strongly agree	Rather agree	Rather agree	Agree	Neither agree or disagree	Strongly disagree	Strongly disagree	Strongly disagree	Rather agree	Neither agree or disagree	Strongly agree
2018-10-30 17:54:25	Rather agree	Rather disagree	Disagree	Rather agree	Rather agree	Rather agree	Rather disagree	Rather disagree	Agree	Rather disagree	Rather agree	Agree	Neither agree or disagree	Neither agree or disagree	Neither agree or disagree	Rather agree	Disagree	Disagree	Disagree	Disagree	Neither agree or disagree	Neither agree or disagree	Neither agree or disagree	Neither agree or disagree	Neither agree or disagree	Agree	Disagree	Rather agree	Rather agree	Rather disagree	Disagree	Agree	Rather agree	Disagree	Agree	Rather disagree	Rather agree	Disagree	Agree	Disagree	Agree	Rather agree	Rather disagree	Rather agree	Neither agree or disagree	Agree	Agree	Rather disagree	Strongly agree
2018-10-30 20:25:07	Rather disagree	Agree	Rather agree	Rather agree	Strongly agree	Strongly agree	Rather agree	Rather agree	Agree	Strongly disagree	Rather agree	Agree	Rather agree	Strongly disagree	Rather disagree	Rather disagree	Strongly disagree	Strongly disagree	Strongly disagree	Strongly disagree	Strongly disagree	Strongly disagree	Rather agree	Rather agree	Neither agree or disagree	Neither agree or disagree	Strongly agree	Agree	Rather agree	Rather agree	Strongly agree	Rather agree	Rather agree	Rather agree	Rather disagree	Strongly agree	Agree	Rather agree	Rather agree	Strongly agree	Rather disagree	Strongly disagree	Agree	Strongly agree	Rather disagree	Strongly agree	Rather agree	Strongly agree	Strongly agree
2018-10-30 21:55:06	Neither agree or disagree	Agree	Strongly agree	Rather agree	Rather agree	Strongly agree	Strongly agree	Rather disagree	Disagree	Disagree	Strongly disagree	Neither agree or disagree	Disagree	Strongly disagree	Strongly disagree	Strongly disagree	Disagree	Disagree	Strongly disagree	Strongly disagree	Strongly disagree	Disagree	Disagree	Disagree	Disagree	Neither agree or disagree	Rather agree	Neither agree or disagree	Rather agree	Neither agree or disagree	Rather agree	Rather agree	Rather agree	Rather disagree	Rather agree	Rather agree	Rather agree	Strongly agree	Rather agree	Agree	Rather agree	Rather disagree	Rather agree	Disagree	Rather disagree	Rather agree	Neither agree or disagree	Rather agree	Agree
2018-10-30 21:57:23	Rather agree	Rather agree	Rather agree	Neither agree or disagree	Strongly disagree	Strongly disagree	Rather agree	Rather disagree	Rather agree	Strongly disagree	Rather disagree	Rather disagree	Neither agree or disagree	Neither agree or disagree	Neither agree or disagree	Neither agree or disagree	Neither agree or disagree	Rather disagree	Rather disagree	Rather disagree	Strongly disagree	Strongly disagree	Strongly disagree	Strongly disagree	Strongly disagree	Rather agree	Strongly disagree	Rather agree	Rather agree	Rather disagree	Disagree	Agree	Rather disagree	Strongly disagree	Rather agree	Rather disagree	Rather agree	Rather agree	Rather disagree	Rather disagree	Rather agree	Rather agree	Rather disagree	Strongly disagree	Rather agree	Rather disagree	Rather agree	Rather disagree	Strongly agree
2018-10-30 22:07:55	Rather agree	Strongly agree	Strongly agree	Strongly agree	Strongly agree	Strongly agree	Rather agree	Rather agree	Strongly agree	Strongly agree	Rather agree	Strongly agree	Strongly agree	Strongly disagree	Strongly agree	Rather agree	Strongly agree	Rather agree	Strongly agree	Strongly disagree	Strongly disagree	Strongly disagree	Rather agree	Neither agree or disagree	Rather agree	Strongly disagree	Strongly agree	Strongly agree	Rather disagree	Rather agree	Strongly agree	Strongly agree	Strongly agree	Rather agree	Strongly disagree	Strongly agree	Rather disagree	Rather agree	Rather agree	Strongly agree	Strongly disagree	Rather disagree	Rather agree	Rather disagree	Strongly disagree	Strongly agree	Strongly disagree	Rather agree	Strongly agree
2018-10-30 22:09:18	Strongly disagree	Neither agree or disagree	Neither agree or disagree	Rather agree	Strongly agree	Agree	Rather agree	Neither agree or disagree	Neither agree or disagree	Rather disagree	Rather disagree	Neither agree or disagree	Neither agree or disagree	Disagree	Disagree	Disagree	Neither agree or disagree	Neither agree or disagree	Strongly disagree	Strongly disagree	Neither agree or disagree	Neither agree or disagree	Neither agree or disagree	Neither agree or disagree	Neither agree or disagree	Strongly agree	Disagree	Strongly agree	Agree	Disagree	Disagree	Agree	Neither agree or disagree	Disagree	Strongly agree	Rather agree	Agree	Rather agree	Agree	Rather disagree	Agree	Strongly agree	Rather disagree	Disagree	Strongly disagree	Rather disagree	Strongly agree	Rather disagree	Strongly agree
2018-10-30 22:11:59	Disagree	Rather agree	Disagree	Neither agree or disagree	Rather agree	Neither agree or disagree	Strongly disagree	Strongly disagree	Rather agree	Strongly disagree	Strongly disagree	Neither agree or disagree	Rather disagree	Neither agree or disagree	Strongly disagree	Disagree	Disagree	Strongly disagree	Disagree	Disagree	Strongly disagree	Strongly disagree	Strongly disagree	Strongly disagree	Disagree	Neither agree or disagree	Agree	Agree	Rather agree	Rather agree	Agree	Rather agree	Agree	Rather agree	Neither agree or disagree	Agree	Strongly agree	Strongly agree	Rather agree	Rather agree	Neither agree or disagree	Rather agree	Rather disagree	Rather disagree	Rather agree	Rather disagree	Agree	Agree	Rather agree
2018-10-30 22:46:14	Strongly disagree	Strongly disagree	Strongly disagree	Disagree	Neither agree or disagree	Neither agree or disagree	Neither agree or disagree	Disagree	Neither agree or disagree	Strongly disagree	Agree	Strongly agree	Neither agree or disagree	Rather agree	Rather agree	Rather agree	Agree	Neither agree or disagree	Agree	Rather disagree	Strongly disagree	Rather disagree	Rather disagree	Neither agree or disagree	Rather disagree	Agree	Neither agree or disagree	Rather disagree	Rather agree	Agree	Agree	Rather agree	Rather agree	Rather agree	Rather disagree	Strongly agree	Agree	Rather agree	Rather agree	Rather disagree	Neither agree or disagree	Strongly agree	Strongly disagree	Strongly disagree	Strongly disagree	Strongly disagree	Strongly agree	Strongly agree	Neither agree or disagree
2018-10-30 23:07:25	Neither agree or disagree	Agree	Rather agree	Agree	Strongly agree	Strongly agree	Rather agree	Disagree	Disagree	Disagree	Rather agree	Neither agree or disagree	Neither agree or disagree	Disagree	Disagree	Neither agree or disagree	Strongly disagree	Strongly disagree	Disagree	Strongly disagree	Strongly disagree	Strongly disagree	Strongly disagree	Strongly disagree	Strongly disagree	Rather agree	Rather disagree	Rather agree	Agree	Rather disagree	Disagree	Rather agree	Rather disagree	Disagree	Agree	Disagree	Agree	Disagree	Agree	Disagree	Agree	Agree	Rather disagree	Disagree	Disagree	Disagree	Agree	Strongly disagree	Agree
2018-10-30 23:22:10	Neither agree or disagree	Neither agree or disagree	Strongly disagree	Agree	Agree	Agree	Agree	Neither agree or disagree	Rather disagree	Disagree	Rather disagree	Rather disagree	Strongly disagree	Strongly disagree	Strongly disagree	Strongly disagree	Strongly disagree	Strongly disagree	Strongly disagree	Strongly disagree	Strongly disagree	Strongly disagree	Strongly disagree	Strongly disagree	Strongly disagree	Neither agree or disagree	Agree	Agree	Strongly agree	Rather disagree	Agree	Agree	Agree	Rather agree	Neither agree or disagree	Agree	Agree	Strongly disagree	Agree	Rather agree	Rather agree	Neither agree or disagree	Strongly agree	Neither agree or disagree	Agree	Neither agree or disagree	Strongly agree	Strongly disagree	Strongly agree
2018-10-31 12:05:07	Strongly disagree	Strongly disagree	Strongly disagree	Rather agree	Strongly disagree	Strongly disagree	Strongly disagree	Strongly disagree	Strongly disagree	Strongly disagree	Strongly disagree	Strongly disagree	Strongly disagree	Strongly disagree	Strongly disagree	Strongly disagree	Strongly disagree	Neither agree or disagree	Strongly disagree	Neither agree or disagree	Neither agree or disagree	Neither agree or disagree	Neither agree or disagree	Neither agree or disagree	Neither agree or disagree	Rather agree	Strongly agree	Strongly agree	Strongly agree	Neither agree or disagree	Rather disagree	Agree	Strongly agree	Rather disagree	Strongly agree	Agree	Strongly agree	Agree	Strongly agree	Rather agree	Strongly agree	Strongly agree	Strongly agree	Neither agree or disagree	Neither agree or disagree	Agree	Agree	Strongly disagree	Strongly disagree
2018-11-02 10:10:37	Neither agree or disagree	Agree	Agree	Agree	Strongly agree	Rather agree	Rather agree	Rather agree	Rather agree	Agree	Rather agree	Agree	Rather agree	Disagree	Rather disagree	Rather agree	Rather agree	Rather agree	Agree	Rather disagree	Neither agree or disagree	Neither agree or disagree	Rather agree	Rather agree	Disagree	Rather agree	Neither agree or disagree	Rather agree	Rather disagree	Rather agree	Rather agree	Rather agree	Rather agree	Agree	Rather disagree	Rather disagree	Strongly agree	Rather agree	Neither agree or disagree	Disagree	Disagree	Strongly disagree	Strongly disagree	Disagree	Neither agree or disagree	Rather disagree	Rather disagree	Disagree	Rather agree
2018-11-02 10:12:03	Disagree	Agree	Strongly agree	Agree	Strongly agree	Strongly agree	Agree	Agree	Rather agree	Rather agree	Disagree	Disagree	Disagree	Rather agree	Agree	Strongly agree	Rather disagree	Rather agree	Agree	Strongly agree	Neither agree or disagree	Rather agree	Strongly agree	Rather disagree	Neither agree or disagree	Rather agree	Rather agree	Neither agree or disagree	Rather disagree	Neither agree or disagree	Rather disagree	Neither agree or disagree	Rather agree	Agree	Agree	Strongly agree	Disagree	Rather disagree	Neither agree or disagree	Rather disagree	Strongly disagree	Strongly disagree	Rather disagree	Strongly disagree	Neither agree or disagree	Rather agree	Disagree	Rather agree	Agree
2018-11-02 10:13:51	Agree	Agree	Agree	Rather disagree	Disagree	Rather disagree	Rather disagree	Neither agree or disagree	Rather agree	Disagree	Rather disagree	Rather disagree	Rather agree	Agree	Rather disagree	Agree	Neither agree or disagree	Rather agree	Rather disagree	Neither agree or disagree	Rather disagree	Agree	Neither agree or disagree	Agree	Rather disagree	Disagree	Rather disagree	Agree	Rather disagree	Disagree	Rather agree	Neither agree or disagree	Neither agree or disagree	Disagree	Rather disagree	Rather disagree	Disagree	Neither agree or disagree	Neither agree or disagree	Agree	Agree	Agree	Rather agree	Rather agree	Rather agree	Rather agree	Agree	Agree	Agree
2018-11-02 10:28:10	Rather agree	Rather agree	Strongly agree	Strongly agree	Strongly agree	Strongly agree	Strongly agree	Strongly agree	Strongly agree	Rather agree	Neither agree or disagree	Neither agree or disagree	Neither agree or disagree	Neither agree or disagree	Neither agree or disagree	Neither agree or disagree	Neither agree or disagree	Neither agree or disagree	Neither agree or disagree	Neither agree or disagree	Neither agree or disagree	Neither agree or disagree	Neither agree or disagree	Neither agree or disagree	Neither agree or disagree	Rather agree	Rather disagree	Rather agree	Rather agree	Rather disagree	Rather disagree	Rather agree	Rather disagree	Rather disagree	Rather agree	Rather disagree	Rather agree	Rather disagree	Rather agree	Rather agree	Rather agree	Rather agree	Rather disagree	Rather disagree	Rather disagree	Rather disagree	Neither agree or disagree	Rather disagree	Rather agree
2018-11-02 10:37:54	Neither agree or disagree	Strongly agree	Rather agree	Agree	Strongly agree	Rather agree	Agree	Agree	Agree	Disagree	Neither agree or disagree	Rather agree	Rather agree	Agree	Agree	Rather agree	Rather disagree	Neither agree or disagree	Disagree	Neither agree or disagree	Disagree	Rather agree	Rather disagree	Rather agree	Rather agree	Neither agree or disagree	Agree	Neither agree or disagree	Rather disagree	Agree	Disagree	Neither agree or disagree	Neither agree or disagree	Rather disagree	Rather disagree	Strongly disagree	Rather agree	Disagree	Neither agree or disagree	Disagree	Disagree	Neither agree or disagree	Rather disagree	Agree	Neither agree or disagree	Rather disagree	Neither agree or disagree	Strongly disagree	Disagree
2018-11-02 10:38:04	Neither agree or disagree	Rather agree	Rather agree	Strongly agree	Strongly agree	Strongly agree	Strongly agree	Rather agree	Strongly agree	Strongly agree	Rather agree	Strongly agree	Neither agree or disagree	Neither agree or disagree	Neither agree or disagree	Rather agree	Strongly disagree	Rather disagree	Strongly disagree	Strongly disagree	Strongly disagree	Rather disagree	Neither agree or disagree	Neither agree or disagree	Neither agree or disagree	Neither agree or disagree	Strongly disagree	Neither agree or disagree	Neither agree or disagree	Neither agree or disagree	Neither agree or disagree	Neither agree or disagree	Neither agree or disagree	Neither agree or disagree	Neither agree or disagree	Neither agree or disagree	Rather agree	Rather agree	Rather agree	Rather disagree	Strongly agree	Strongly agree	Rather disagree	Rather disagree	Rather disagree	Rather disagree	Strongly agree	Rather disagree	Rather agree
2018-11-02 10:49:12	Rather disagree	Neither agree or disagree	Disagree	Rather agree	Strongly disagree	Disagree	Strongly disagree	Strongly disagree	Rather disagree	Rather disagree	Rather disagree	Rather agree	Strongly disagree	Disagree	Rather disagree	Rather disagree	Rather agree	Strongly disagree	Disagree	Rather disagree	Rather disagree	Rather disagree	Rather disagree	Rather disagree	Neither agree or disagree	Rather agree	Rather agree	Agree	Rather agree	Rather agree	Agree	Rather agree	Agree	Rather agree	Disagree	Agree	Rather disagree	Agree	Rather disagree	Agree	Disagree	Disagree	Rather agree	Rather disagree	Strongly disagree	Rather disagree	Rather disagree	Strongly disagree	Rather disagree
2018-11-02 11:03:32	Rather agree	Strongly disagree	Strongly disagree	Strongly agree	Strongly agree	Strongly agree	Rather agree	Strongly disagree	Strongly disagree	Strongly disagree	Rather agree	Rather agree	Strongly disagree	Neither agree or disagree	Neither agree or disagree	Strongly agree	Rather agree	Strongly disagree	Strongly disagree	Strongly disagree	Strongly disagree	Strongly disagree	Strongly disagree	Rather agree	Strongly disagree	Rather disagree	Strongly agree	Strongly agree	Rather agree	Rather agree	Agree	Neither agree or disagree	Rather agree	Rather agree	Rather agree	Rather agree	Agree	Agree	Strongly agree	Agree	Strongly agree	Agree	Agree	Rather agree	Strongly disagree	Rather agree	Rather agree	Strongly agree	Strongly agree
2018-11-02 11:07:17	Disagree	Disagree	Disagree	Rather agree	Rather agree	Rather agree	Rather agree	Rather agree	Rather agree	Disagree	Disagree	Disagree	Disagree	Strongly disagree	Disagree	Rather disagree	Strongly disagree	Strongly disagree	Strongly disagree	Strongly disagree	Strongly disagree	Strongly disagree	Strongly disagree	Strongly disagree	Strongly disagree	Neither agree or disagree	Neither agree or disagree	Rather agree	Neither agree or disagree	Rather agree	Rather agree	Neither agree or disagree	Rather disagree	Neither agree or disagree	Rather agree	Neither agree or disagree	Rather agree	Neither agree or disagree	Agree	Neither agree or disagree	Rather agree	Rather agree	Agree	Rather agree	Rather disagree	Neither agree or disagree	Agree	Rather agree	Strongly agree
2018-11-02 13:25:15	Agree	Rather agree	Rather agree	Strongly agree	Rather agree	Rather agree	Rather agree	Strongly disagree	Disagree	Agree	Agree	Strongly agree	Agree	Rather agree	Rather agree	Rather agree	Strongly disagree	Strongly disagree	Strongly disagree	Strongly disagree	Strongly disagree	Strongly disagree	Strongly disagree	Disagree	Agree	Strongly agree	Strongly disagree	Strongly agree	Strongly agree	Strongly disagree	Strongly disagree	Strongly agree	Strongly disagree	Strongly disagree	Strongly agree	Strongly disagree	Strongly disagree	Strongly disagree	Strongly agree	Rather agree	Strongly agree	Strongly agree	Strongly disagree	Strongly disagree	Strongly disagree	Strongly disagree	Strongly agree	Strongly disagree	Strongly agree
2018-11-02 13:25:57	Agree	Rather agree	Rather agree	Strongly agree	Rather agree	Rather agree	Rather agree	Strongly disagree	Disagree	Agree	Agree	Strongly agree	Agree	Rather agree	Rather agree	Rather agree	Strongly disagree	Strongly disagree	Strongly disagree	Strongly disagree	Strongly disagree	Strongly disagree	Strongly disagree	Disagree	Agree	Strongly agree	Strongly disagree	Strongly agree	Strongly agree	Strongly disagree	Strongly disagree	Strongly agree	Strongly disagree	Strongly disagree	Strongly agree	Strongly disagree	Strongly disagree	Strongly disagree	Strongly agree	Rather agree	Strongly agree	Strongly agree	Strongly disagree	Strongly disagree	Strongly disagree	Strongly disagree	Strongly agree	Strongly disagree	Strongly agree
2018-11-02 14:05:41	Agree	Neither agree or disagree	Rather agree	Rather agree	Agree	Rather agree	Neither agree or disagree	Rather disagree	Neither agree or disagree	Rather disagree	Rather agree	Neither agree or disagree	Neither agree or disagree	Neither agree or disagree	Rather agree	Rather disagree	Neither agree or disagree	Neither agree or disagree	Disagree	Disagree	Disagree	Disagree	Neither agree or disagree	Neither agree or disagree	Rather agree	Agree	Neither agree or disagree	Agree	Agree	Neither agree or disagree	Rather disagree	Agree	Neither agree or disagree	Rather disagree	Rather agree	Rather agree	Agree	Neither agree or disagree	Agree	Neither agree or disagree	Rather agree	Agree	Rather disagree	Rather disagree	Rather disagree	Rather disagree	Agree	Rather disagree	Agree
2018-11-02 15:57:22	Rather agree	Rather disagree	Rather disagree	Neither agree or disagree	Rather disagree	Agree	Agree	Agree	Strongly agree	Rather disagree	Rather agree	Neither agree or disagree	Rather agree	Agree	Rather disagree	Neither agree or disagree	Rather agree	Strongly agree	Rather agree	Rather disagree	Disagree	Rather disagree	Rather disagree	Rather disagree	Rather agree	Neither agree or disagree	Strongly disagree	Rather disagree	Disagree	Rather disagree	Rather disagree	Neither agree or disagree	Rather disagree	Rather agree	Rather disagree	Disagree	Neither agree or disagree	Rather agree	Rather agree	Rather agree	Rather agree	Disagree	Rather disagree	Rather disagree	Neither agree or disagree	Rather agree	Neither agree or disagree	Rather agree	Strongly agree
2018-11-02 16:04:20	Agree	Strongly agree	Neither agree or disagree	Rather disagree	Rather disagree	Rather disagree	Rather disagree	Rather disagree	Rather agree	Rather disagree	Rather disagree	Rather agree	Neither agree or disagree	Neither agree or disagree	Rather agree	Neither agree or disagree	Strongly disagree	Agree	Rather agree	Rather agree	Rather agree	Neither agree or disagree	Disagree	Neither agree or disagree	Neither agree or disagree	Strongly agree	Agree	Disagree	Strongly disagree	Rather disagree	Rather disagree	Rather disagree	Rather disagree	Neither agree or disagree	Rather disagree	Disagree	Rather disagree	Neither agree or disagree	Neither agree or disagree	Neither agree or disagree	Neither agree or disagree	Rather agree	Rather agree	Rather disagree	Strongly disagree	Neither agree or disagree	Neither agree or disagree	Rather agree	Rather disagree
2018-11-02 16:13:56	Rather disagree	Rather agree	Agree	Agree	Agree	Neither agree or disagree	Neither agree or disagree	Rather agree	Agree	Strongly agree	Agree	Disagree	Neither agree or disagree	Rather agree	Rather agree	Disagree	Strongly disagree	Rather agree	Agree	Rather disagree	Rather disagree	Rather disagree	Strongly disagree	Disagree	Agree	Neither agree or disagree	Disagree	Neither agree or disagree	Neither agree or disagree	Disagree	Rather agree	Rather agree	Neither agree or disagree	Disagree	Rather disagree	Disagree	Rather agree	Neither agree or disagree	Rather agree	Neither agree or disagree	Strongly disagree	Rather disagree	Rather disagree	Rather disagree	Disagree	Disagree	Neither agree or disagree	Rather disagree	Neither agree or disagree
2018-11-02 16:15:18	Agree	Agree	Agree	Agree	Agree	Agree	Rather agree	Agree	Agree	Agree	Agree	Agree	Rather agree	Strongly agree	Strongly disagree	Disagree	Neither agree or disagree	Rather agree	Rather disagree	Neither agree or disagree	Rather agree	Agree	Neither agree or disagree	Strongly disagree	Neither agree or disagree	Rather disagree	Strongly disagree	Rather disagree	Strongly disagree	Neither agree or disagree	Disagree	Neither agree or disagree	Strongly disagree	Rather disagree	Neither agree or disagree	Rather agree	Rather agree	Strongly agree	Strongly agree	Disagree	Rather disagree	Disagree	Rather disagree	Neither agree or disagree	Neither agree or disagree	Disagree	Strongly disagree	Strongly disagree	Rather disagree
2018-11-02 16:16:45	Strongly agree	Agree	Strongly agree	Strongly disagree	Disagree	Rather agree	Rather disagree	Neither agree or disagree	Rather agree	Rather disagree	Agree	Disagree	Rather agree	Neither agree or disagree	Agree	Neither agree or disagree	Strongly agree	Disagree	Rather disagree	Rather disagree	Rather disagree	Rather disagree	Disagree	Rather disagree	Neither agree or disagree	Agree	Rather disagree	Rather disagree	Rather disagree	Disagree	Rather agree	Rather disagree	Rather disagree	Rather disagree	Disagree	Disagree	Neither agree or disagree	Neither agree or disagree	Agree	Rather disagree	Rather disagree	Neither agree or disagree	Rather disagree	Disagree	Neither agree or disagree	Rather disagree	Rather disagree	Neither agree or disagree	Rather disagree
2018-11-02 16:19:17	Rather disagree	Rather disagree	Rather disagree	Disagree	Rather agree	Neither agree or disagree	Rather agree	Disagree	Rather disagree	Rather disagree	Neither agree or disagree	Rather agree	Strongly disagree	Disagree	Rather disagree	Disagree	Rather agree	Rather agree	Rather agree	Agree	Agree	Rather agree	Rather agree	Disagree	Rather disagree	Strongly agree	Disagree	Rather disagree	Disagree	Rather disagree	Disagree	Rather agree	Rather disagree	Rather disagree	Disagree	Disagree	Neither agree or disagree	Rather disagree	Neither agree or disagree	Rather agree	Agree	Neither agree or disagree	Agree	Strongly agree	Disagree	Rather disagree	Disagree	Neither agree or disagree	Disagree
2018-11-02 16:23:24	Disagree	Rather disagree	Neither agree or disagree	Rather agree	Rather agree	Disagree	Rather disagree	Neither agree or disagree	Neither agree or disagree	Rather agree	Rather agree	Neither agree or disagree	Rather agree	Rather disagree	Neither agree or disagree	Strongly agree	Strongly disagree	Rather disagree	Neither agree or disagree	Agree	Agree	Agree	Disagree	Rather agree	Rather agree	Rather disagree	Neither agree or disagree	Rather disagree	Rather agree	Rather agree	Disagree	Neither agree or disagree	Disagree	Rather disagree	Disagree	Disagree	Strongly disagree	Agree	Disagree	Rather disagree	Disagree	Neither agree or disagree	Neither agree or disagree	Agree	Neither agree or disagree	Neither agree or disagree	Rather disagree	Rather disagree	Rather disagree
2018-11-03 14:17:47	Rather disagree	Rather agree	Rather agree	Rather agree	Rather agree	Rather agree	Rather disagree	Rather disagree	Rather disagree	Rather agree	Rather agree	Rather agree	Rather agree	Neither agree or disagree	Neither agree or disagree	Neither agree or disagree	Neither agree or disagree	Neither agree or disagree	Neither agree or disagree	Neither agree or disagree	Neither agree or disagree	Neither agree or disagree	Neither agree or disagree	Neither agree or disagree	Neither agree or disagree	Strongly agree	Strongly disagree	Agree	Agree	Strongly disagree	Strongly disagree	Rather agree	Strongly disagree	Strongly disagree	Rather agree	Strongly disagree	Rather agree	Disagree	Rather agree	Disagree	Agree	Rather agree	Disagree	Disagree	Strongly disagree	Strongly disagree	Agree	Strongly disagree	Rather agree
2018-11-03 15:57:43	Rather agree	Agree	Rather disagree	Agree	Strongly agree	Strongly agree	Strongly agree	Rather disagree	Rather disagree	Rather disagree	Rather agree	Rather agree	Neither agree or disagree	Rather agree	Strongly agree	Strongly agree	Rather disagree	Rather agree	Rather agree	Rather disagree	Disagree	Disagree	Rather agree	Agree	Rather agree	Rather disagree	Agree	Rather agree	Rather agree	Rather agree	Rather agree	Neither agree or disagree	Rather agree	Rather disagree	Neither agree or disagree	Rather agree	Neither agree or disagree	Rather disagree	Rather disagree	Rather agree	Neither agree or disagree	Rather agree	Rather agree	Rather agree	Rather agree	Agree	Neither agree or disagree	Rather disagree	Rather agree
2018-11-03 16:46:52	Rather disagree	Agree	Rather agree	Strongly agree	Rather agree	Rather agree	Rather agree	Rather disagree	Rather disagree	Rather disagree	Rather agree	Agree	Rather agree	Rather disagree	Rather disagree	Rather disagree	Rather disagree	Disagree	Strongly disagree	Rather disagree	Strongly disagree	Disagree	Neither agree or disagree	Rather disagree	Disagree	Agree	Rather disagree	Rather agree	Rather agree	Rather disagree	Rather disagree	Rather agree	Strongly agree	Rather disagree	Rather agree	Rather disagree	Rather agree	Disagree	Agree	Rather agree	Agree	Rather agree	Rather disagree	Rather disagree	Disagree	Rather agree	Rather agree	Rather agree	Agree
2018-11-03 18:27:49	Rather disagree	Rather disagree	Neither agree or disagree	Rather agree	Agree	Agree	Rather disagree	Rather disagree	Rather agree	Rather disagree	Strongly disagree	Rather disagree	Disagree	Rather agree	Rather agree	Neither agree or disagree	Rather agree	Rather agree	Neither agree or disagree	Rather disagree	Neither agree or disagree	Neither agree or disagree	Rather agree	Rather agree	Neither agree or disagree	Rather disagree	Rather agree	Agree	Strongly agree	Rather agree	Rather agree	Agree	Agree	Disagree	Rather agree	Rather disagree	Strongly agree	Rather disagree	Rather agree	Agree	Rather agree	Rather agree	Rather agree	Rather disagree	Disagree	Rather disagree	Rather disagree	Agree	Strongly agree
2018-11-03 18:37:34	Disagree	Agree	Rather disagree	Agree	Rather agree	Rather agree	Rather disagree	Rather disagree	Agree	Rather disagree	Disagree	Rather disagree	Rather disagree	Rather agree	Rather agree	Rather disagree	Rather agree	Rather agree	Rather agree	Rather disagree	Rather disagree	Rather disagree	Rather agree	Rather agree	Neither agree or disagree	Rather disagree	Rather agree	Rather agree	Rather agree	Rather agree	Rather agree	Rather agree	Agree	Rather disagree	Rather agree	Rather disagree	Rather agree	Rather disagree	Rather agree	Rather agree	Rather agree	Agree	Rather agree	Rather disagree	Rather disagree	Rather agree	Rather agree	Rather agree	Rather agree
2018-11-03 18:42:27	Neither agree or disagree	Neither agree or disagree	Rather disagree	Strongly agree	Strongly agree	Strongly agree	Rather agree	Rather disagree	Neither agree or disagree	Agree	Neither agree or disagree	Rather agree	Neither agree or disagree	Rather disagree	Neither agree or disagree	Strongly disagree	Neither agree or disagree	Rather agree	Neither agree or disagree	Rather disagree	Neither agree or disagree	Neither agree or disagree	Rather disagree	Rather disagree	Neither agree or disagree	Rather disagree	Rather disagree	Rather disagree	Rather disagree	Disagree	Rather disagree	Rather disagree	Agree	Strongly disagree	Neither agree or disagree	Rather disagree	Neither agree or disagree	Rather agree	Rather disagree	Neither agree or disagree	Rather disagree	Rather agree	Rather disagree	Rather disagree	Neither agree or disagree	Neither agree or disagree	Rather agree	Rather disagree	Rather agree
2018-11-03 18:49:15	Strongly disagree	Neither agree or disagree	Rather disagree	Rather agree	Rather agree	Rather agree	Rather disagree	Rather disagree	Disagree	Strongly disagree	Rather disagree	Rather disagree	Neither agree or disagree	Neither agree or disagree	Neither agree or disagree	Neither agree or disagree	Strongly disagree	Strongly disagree	Strongly disagree	Strongly disagree	Strongly disagree	Strongly disagree	Neither agree or disagree	Neither agree or disagree	Neither agree or disagree	Rather agree	Rather agree	Rather agree	Rather agree	Rather disagree	Rather disagree	Rather agree	Rather agree	Strongly disagree	Agree	Rather disagree	Agree	Disagree	Rather agree	Rather agree	Agree	Rather agree	Rather disagree	Rather agree	Disagree	Rather disagree	Agree	Rather agree	Agree
2018-11-03 20:17:02	Disagree	Strongly agree	Neither agree or disagree	Agree	Agree	Agree	Agree	Rather agree	Agree	Rather disagree	Strongly disagree	Strongly disagree	Strongly disagree	Neither agree or disagree	Neither agree or disagree	Neither agree or disagree	Strongly disagree	Strongly disagree	Strongly disagree	Strongly disagree	Strongly disagree	Strongly disagree	Strongly disagree	Strongly disagree	Strongly disagree	Rather disagree	Agree	Strongly agree	Disagree	Rather agree	Agree	Rather agree	Agree	Strongly agree	Rather disagree	Agree	Agree	Rather disagree	Rather disagree	Agree	Rather disagree	Rather agree	Agree	Strongly disagree	Disagree	Rather agree	Neither agree or disagree	Rather disagree	Agree
2018-11-03 21:59:23	Disagree	Disagree	Disagree	Rather disagree	Disagree	Neither agree or disagree	Neither agree or disagree	Rather disagree	Disagree	Disagree	Rather disagree	Neither agree or disagree	Neither agree or disagree	Strongly disagree	Strongly disagree	Strongly disagree	Strongly disagree	Strongly disagree	Strongly disagree	Strongly disagree	Disagree	Disagree	Disagree	Disagree	Disagree	Agree	Neither agree or disagree	Agree	Rather agree	Rather disagree	Neither agree or disagree	Rather agree	Rather agree	Rather disagree	Rather agree	Rather agree	Agree	Rather disagree	Agree	Neither agree or disagree	Agree	Agree	Neither agree or disagree	Rather disagree	Strongly disagree	Strongly disagree	Agree	Disagree	Strongly agree
2018-11-03 22:02:38	Agree	Rather agree	Rather agree	Strongly agree	Agree	Rather agree	Rather agree	Rather agree	Strongly agree	Agree	Rather agree	Neither agree or disagree	Rather agree	Neither agree or disagree	Neither agree or disagree	Rather agree	Neither agree or disagree	Rather agree	Neither agree or disagree	Neither agree or disagree	Neither agree or disagree	Rather disagree	Rather agree	Neither agree or disagree	Neither agree or disagree	Rather agree	Rather disagree	Rather agree	Rather agree	Disagree	Neither agree or disagree	Rather agree	Agree	Rather disagree	Agree	Rather agree	Agree	Rather agree	Agree	Rather agree	Rather agree	Rather disagree	Disagree	Rather agree	Disagree	Neither agree or disagree	Rather agree	Rather agree	Strongly agree
2018-11-03 22:05:53	Strongly disagree	Strongly disagree	Strongly disagree	Strongly disagree	Strongly disagree	Strongly disagree	Strongly disagree	Strongly disagree	Rather agree	Strongly disagree	Disagree	Strongly disagree	Strongly disagree	Strongly disagree	Disagree	Strongly disagree	Strongly disagree	Strongly disagree	Strongly disagree	Strongly disagree	Disagree	Strongly disagree	Disagree	Strongly disagree	Strongly disagree	Agree	Rather disagree	Agree	Strongly agree	Disagree	Neither agree or disagree	Strongly agree	Rather disagree	Strongly disagree	Agree	Rather disagree	Strongly agree	Rather disagree	Strongly agree	Rather disagree	Strongly agree	Strongly agree	Rather disagree	Rather disagree	Disagree	Disagree	Agree	Strongly disagree	Strongly agree
2018-11-04 10:50:19	Strongly disagree	Strongly disagree	Strongly disagree	Disagree	Strongly disagree	Strongly disagree	Strongly disagree	Strongly agree	Neither agree or disagree	Rather disagree	Disagree	Neither agree or disagree	Neither agree or disagree	Neither agree or disagree	Neither agree or disagree	Neither agree or disagree	Neither agree or disagree	Neither agree or disagree	Neither agree or disagree	Neither agree or disagree	Neither agree or disagree	Neither agree or disagree	Neither agree or disagree	Neither agree or disagree	Neither agree or disagree	Rather agree	Disagree	Rather agree	Strongly agree	Disagree	Strongly disagree	Strongly agree	Neither agree or disagree	Strongly disagree	Rather agree	Neither agree or disagree	Neither agree or disagree	Neither agree or disagree	Neither agree or disagree	Strongly disagree	Neither agree or disagree	Rather agree	Neither agree or disagree	Neither agree or disagree	Neither agree or disagree	Neither agree or disagree	Neither agree or disagree	Neither agree or disagree	Neither agree or disagree
2018-11-04 10:59:18	Rather disagree	Neither agree or disagree	Disagree	Rather agree	Agree	Agree	Rather agree	Rather agree	Rather agree	Rather disagree	Rather disagree	Neither agree or disagree	Rather disagree	Neither agree or disagree	Neither agree or disagree	Neither agree or disagree	Neither agree or disagree	Neither agree or disagree	Rather disagree	Rather disagree	Rather disagree	Rather disagree	Neither agree or disagree	Neither agree or disagree	Neither agree or disagree	Rather agree	Rather agree	Agree	Rather agree	Rather disagree	Rather agree	Rather agree	Agree	Rather disagree	Rather agree	Rather agree	Rather agree	Rather disagree	Agree	Rather disagree	Rather agree	Rather agree	Rather agree	Rather disagree	Rather disagree	Rather disagree	Neither agree or disagree	Rather disagree	Agree
2018-11-04 12:59:06	Rather agree	Strongly agree	Rather agree	Neither agree or disagree	Rather agree	Rather agree	Strongly disagree	Rather agree	Rather agree	Neither agree or disagree	Agree	Rather agree	Agree	Rather agree	Agree	Agree	Rather agree	Agree	Agree	Neither agree or disagree	Rather agree	Neither agree or disagree	Strongly agree	Rather agree	Rather agree	Rather agree	Disagree	Rather agree	Neither agree or disagree	Rather disagree	Agree	Neither agree or disagree	Neither agree or disagree	Rather agree	Neither agree or disagree	Rather agree	Agree	Agree	Agree	Strongly agree	Rather agree	Neither agree or disagree	Agree	Neither agree or disagree	Neither agree or disagree	Agree	Agree	Rather agree	Rather agree
2018-11-04 13:02:34	Rather agree	Strongly disagree	Rather disagree	Agree	Agree	Agree	Rather disagree	Rather agree	Rather disagree	Rather disagree	Strongly disagree	Strongly disagree	Strongly disagree	Disagree	Strongly disagree	Agree	Strongly disagree	Strongly disagree	Strongly disagree	Strongly disagree	Strongly disagree	Strongly disagree	Strongly disagree	Strongly disagree	Strongly disagree	Rather disagree	Agree	Rather agree	Agree	Strongly agree	Agree	Disagree	Neither agree or disagree	Neither agree or disagree	Rather agree	Rather disagree	Agree	Neither agree or disagree	Rather agree	Strongly agree	Rather agree	Rather disagree	Rather disagree	Disagree	Strongly agree	Neither agree or disagree	Strongly disagree	Agree	Strongly agree
2018-11-04 13:09:43	Neither agree or disagree	Strongly disagree	Strongly disagree	Rather agree	Rather agree	Rather agree	Rather disagree	Strongly disagree	Strongly disagree	Strongly disagree	Disagree	Strongly disagree	Disagree	Rather disagree	Strongly disagree	Strongly disagree	Strongly disagree	Strongly disagree	Strongly disagree	Neither agree or disagree	Neither agree or disagree	Neither agree or disagree	Strongly disagree	Strongly disagree	Strongly disagree	Rather disagree	Rather agree	Rather agree	Rather agree	Rather agree	Rather agree	Rather agree	Rather disagree	Rather disagree	Neither agree or disagree	Rather disagree	Rather agree	Rather disagree	Neither agree or disagree	Rather agree	Rather agree	Rather agree	Rather disagree	Rather disagree	Disagree	Rather agree	Rather agree	Rather agree	Rather agree
2018-11-04 13:12:57	Neither agree or disagree	Neither agree or disagree	Rather disagree	Rather disagree	Rather agree	Rather agree	Rather disagree	Disagree	Strongly disagree	Strongly disagree	Rather disagree	Rather disagree	Strongly disagree	Strongly disagree	Strongly disagree	Strongly disagree	Strongly disagree	Strongly disagree	Strongly disagree	Strongly disagree	Strongly disagree	Strongly disagree	Strongly disagree	Strongly disagree	Strongly disagree	Strongly agree	Strongly disagree	Strongly agree	Strongly agree	Strongly disagree	Strongly disagree	Strongly agree	Strongly disagree	Strongly disagree	Strongly agree	Strongly disagree	Strongly agree	Strongly disagree	Strongly agree	Strongly disagree	Strongly agree	Strongly agree	Strongly disagree	Strongly disagree	Strongly disagree	Strongly disagree	Strongly agree	Strongly disagree	Strongly agree
2018-11-04 13:19:22	Rather disagree	Rather disagree	Rather disagree	Rather agree	Rather disagree	Rather agree	Rather disagree	Disagree	Rather disagree	Disagree	Rather disagree	Neither agree or disagree	Rather disagree	Disagree	Neither agree or disagree	Neither agree or disagree	Disagree	Disagree	Strongly disagree	Strongly disagree	Strongly disagree	Disagree	Neither agree or disagree	Neither agree or disagree	Strongly disagree	Agree	Strongly disagree	Agree	Rather agree	Disagree	Disagree	Rather agree	Disagree	Strongly disagree	Agree	Disagree	Rather agree	Rather agree	Rather agree	Neither agree or disagree	Rather agree	Rather agree	Rather disagree	Disagree	Strongly disagree	Disagree	Neither agree or disagree	Rather agree	Rather agree
2018-11-04 14:02:34	Rather disagree	Rather agree	Neither agree or disagree	Disagree	Agree	Agree	Rather agree	Rather disagree	Strongly agree	Rather agree	Neither agree or disagree	Neither agree or disagree	Neither agree or disagree	Disagree	Neither agree or disagree	Neither agree or disagree	Strongly disagree	Neither agree or disagree	Disagree	Neither agree or disagree	Strongly disagree	Strongly disagree	Strongly disagree	Strongly disagree	Strongly disagree	Agree	Rather disagree	Strongly agree	Agree	Strongly disagree	Rather agree	Rather agree	Rather disagree	Strongly disagree	Rather agree	Rather disagree	Rather agree	Strongly disagree	Neither agree or disagree	Strongly disagree	Agree	Rather agree	Strongly agree	Rather disagree	Rather disagree	Rather agree	Rather agree	Rather disagree	Agree
2018-11-04 14:35:45	Strongly disagree	Rather disagree	Rather agree	Rather agree	Rather disagree	Rather disagree	Rather disagree	Rather disagree	Rather disagree	Disagree	Neither agree or disagree	Rather agree	Strongly disagree	Strongly disagree	Strongly disagree	Strongly disagree	Strongly disagree	Strongly disagree	Strongly disagree	Strongly disagree	Strongly disagree	Strongly disagree	Strongly disagree	Strongly disagree	Strongly disagree	Rather agree	Rather agree	Strongly agree	Strongly agree	Rather disagree	Rather disagree	Strongly agree	Agree	Disagree	Rather agree	Agree	Rather agree	Rather agree	Rather disagree	Agree	Rather agree	Rather disagree	Rather agree	Rather agree	Strongly disagree	Rather disagree	Rather agree	Rather agree	Agree
2018-11-04 14:48:05	Strongly disagree	Strongly disagree	Strongly disagree	Rather disagree	Rather disagree	Strongly disagree	Strongly disagree	Strongly disagree	Strongly disagree	Strongly disagree	Rather agree	Agree	Strongly disagree	Neither agree or disagree	Neither agree or disagree	Neither agree or disagree	Strongly disagree	Strongly disagree	Strongly disagree	Strongly disagree	Strongly disagree	Strongly disagree	Rather agree	Rather agree	Agree	Agree	Neither agree or disagree	Strongly agree	Agree	Rather agree	Disagree	Agree	Disagree	Disagree	Agree	Disagree	Strongly agree	Neither agree or disagree	Strongly agree	Rather disagree	Agree	Agree	Rather disagree	Strongly disagree	Disagree	Disagree	Rather agree	Neither agree or disagree	Strongly agree
2018-11-04 14:53:02	Rather disagree	Neither agree or disagree	Rather disagree	Rather disagree	Neither agree or disagree	Rather disagree	Disagree	Disagree	Neither agree or disagree	Disagree	Rather disagree	Disagree	Neither agree or disagree	Neither agree or disagree	Neither agree or disagree	Neither agree or disagree	Neither agree or disagree	Rather disagree	Neither agree or disagree	Rather disagree	Neither agree or disagree	Neither agree or disagree	Neither agree or disagree	Neither agree or disagree	Neither agree or disagree	Rather agree	Rather disagree	Rather agree	Agree	Rather disagree	Disagree	Agree	Rather disagree	Strongly disagree	Rather agree	Rather agree	Strongly agree	Rather agree	Strongly agree	Neither agree or disagree	Agree	Strongly agree	Rather disagree	Rather agree	Disagree	Neither agree or disagree	Rather agree	Disagree	Strongly agree
2018-11-04 14:59:40	Agree	Agree	Rather agree	Agree	Strongly agree	Strongly agree	Rather agree	Rather agree	Agree	Agree	Rather agree	Strongly agree	Agree	Rather agree	Neither agree or disagree	Rather agree	Rather disagree	Rather agree	Neither agree or disagree	Rather agree	Neither agree or disagree	Neither agree or disagree	Neither agree or disagree	Neither agree or disagree	Rather agree	Agree	Rather disagree	Strongly agree	Strongly agree	Disagree	Rather disagree	Strongly agree	Disagree	Disagree	Agree	Rather agree	Strongly agree	Rather disagree	Agree	Rather agree	Strongly agree	Rather agree	Rather disagree	Rather agree	Strongly disagree	Neither agree or disagree	Agree	Rather disagree	Strongly agree
2018-11-04 15:07:35	Strongly agree	Strongly disagree	Strongly disagree	Agree	Strongly agree	Rather agree	Agree	Strongly disagree	Strongly disagree	Strongly disagree	Strongly disagree	Strongly disagree	Strongly disagree	Strongly disagree	Strongly disagree	Strongly disagree	Strongly disagree	Strongly disagree	Strongly disagree	Strongly disagree	Strongly disagree	Strongly disagree	Strongly disagree	Strongly disagree	Strongly disagree	Agree	Rather agree	Rather agree	Strongly agree	Strongly disagree	Rather agree	Strongly agree	Strongly disagree	Strongly disagree	Agree	Strongly agree	Strongly agree	Strongly disagree	Neither agree or disagree	Strongly agree	Rather agree	Rather agree	Rather disagree	Strongly agree	Strongly disagree	Strongly agree	Rather disagree	Neither agree or disagree	Neither agree or disagree
2018-11-04 15:12:06	Rather agree	Rather agree	Neither agree or disagree	Rather agree	Rather agree	Rather agree	Strongly disagree	Disagree	Rather disagree	Rather disagree	Neither agree or disagree	Neither agree or disagree	Neither agree or disagree	Neither agree or disagree	Neither agree or disagree	Neither agree or disagree	Neither agree or disagree	Neither agree or disagree	Neither agree or disagree	Neither agree or disagree	Neither agree or disagree	Neither agree or disagree	Neither agree or disagree	Neither agree or disagree	Neither agree or disagree	Neither agree or disagree	Neither agree or disagree	Rather agree	Rather agree	Rather disagree	Neither agree or disagree	Rather agree	Rather disagree	Disagree	Rather agree	Neither agree or disagree	Rather agree	Rather disagree	Rather agree	Neither agree or disagree	Neither agree or disagree	Neither agree or disagree	Neither agree or disagree	Neither agree or disagree	Neither agree or disagree	Neither agree or disagree	Neither agree or disagree	Neither agree or disagree	Neither agree or disagree
2018-11-04 15:19:04	Rather agree	Rather disagree	Rather disagree	Rather agree	Rather agree	Rather agree	Strongly disagree	Neither agree or disagree	Rather agree	Rather agree	Neither agree or disagree	Neither agree or disagree	Neither agree or disagree	Strongly disagree	Strongly disagree	Neither agree or disagree	Neither agree or disagree	Neither agree or disagree	Strongly disagree	Strongly disagree	Neither agree or disagree	Neither agree or disagree	Neither agree or disagree	Neither agree or disagree	Neither agree or disagree	Rather agree	Rather agree	Agree	Strongly agree	Strongly disagree	Agree	Strongly agree	Strongly agree	Strongly disagree	Strongly agree	Rather agree	Agree	Rather disagree	Agree	Rather agree	Strongly agree	Agree	Agree	Strongly agree	Disagree	Strongly agree	Agree	Rather disagree	Strongly agree
2018-11-04 15:37:02	Rather disagree	Neither agree or disagree	Rather disagree	Rather disagree	Rather agree	Rather agree	Neither agree or disagree	Rather disagree	Rather disagree	Rather disagree	Rather disagree	Neither agree or disagree	Neither agree or disagree	Neither agree or disagree	Neither agree or disagree	Neither agree or disagree	Neither agree or disagree	Neither agree or disagree	Neither agree or disagree	Neither agree or disagree	Neither agree or disagree	Neither agree or disagree	Neither agree or disagree	Neither agree or disagree	Neither agree or disagree	Rather agree	Rather disagree	Rather agree	Rather agree	Rather disagree	Rather disagree	Agree	Rather agree	Disagree	Agree	Rather disagree	Agree	Rather disagree	Rather agree	Rather agree	Rather agree	Rather agree	Rather agree	Strongly disagree	Rather disagree	Rather agree	Rather agree	Rather disagree	Rather agree
2018-11-04 15:53:34	Agree	Strongly agree	Agree	Agree	Agree	Agree	Rather agree	Rather disagree	Rather disagree	Rather disagree	Agree	Agree	Neither agree or disagree	Neither agree or disagree	Neither agree or disagree	Neither agree or disagree	Neither agree or disagree	Neither agree or disagree	Rather disagree	Rather disagree	Rather disagree	Rather disagree	Rather agree	Rather agree	Rather agree	Agree	Rather disagree	Agree	Agree	Rather disagree	Rather disagree	Agree	Rather disagree	Strongly disagree	Agree	Rather agree	Rather agree	Rather disagree	Rather agree	Rather agree	Rather agree	Rather agree	Rather disagree	Rather agree	Strongly disagree	Rather agree	Rather agree	Disagree	Rather agree
2018-11-04 15:53:46	Strongly disagree	Neither agree or disagree	Neither agree or disagree	Strongly agree	Rather disagree	Rather agree	Neither agree or disagree	Rather disagree	Agree	Agree	Rather disagree	Neither agree or disagree	Neither agree or disagree	Neither agree or disagree	Neither agree or disagree	Neither agree or disagree	Neither agree or disagree	Neither agree or disagree	Neither agree or disagree	Neither agree or disagree	Neither agree or disagree	Neither agree or disagree	Neither agree or disagree	Neither agree or disagree	Neither agree or disagree	Agree	Disagree	Agree	Strongly agree	Rather disagree	Neither agree or disagree	Strongly agree	Strongly agree	Disagree	Agree	Rather agree	Strongly agree	Rather disagree	Strongly agree	Rather disagree	Strongly agree	Strongly agree	Neither agree or disagree	Rather agree	Strongly disagree	Neither agree or disagree	Strongly agree	Rather disagree	Strongly agree
2018-11-04 16:00:20	Neither agree or disagree	Strongly agree	Agree	Strongly agree	Strongly agree	Strongly agree	Strongly agree	Strongly agree	Rather agree	Strongly agree	Rather disagree	Neither agree or disagree	Rather disagree	Neither agree or disagree	Neither agree or disagree	Neither agree or disagree	Neither agree or disagree	Neither agree or disagree	Neither agree or disagree	Neither agree or disagree	Neither agree or disagree	Neither agree or disagree	Neither agree or disagree	Neither agree or disagree	Neither agree or disagree	Strongly agree	Strongly agree	Strongly agree	Agree	Rather disagree	Strongly agree	Strongly agree	Strongly agree	Disagree	Strongly agree	Strongly agree	Strongly agree	Strongly agree	Strongly agree	Strongly agree	Strongly agree	Strongly agree	Agree	Strongly agree	Neither agree or disagree	Agree	Rather disagree	Agree	Agree
2018-11-04 16:38:02	Strongly disagree	Strongly disagree	Strongly disagree	Strongly disagree	Strongly disagree	Strongly disagree	Strongly disagree	Strongly disagree	Strongly disagree	Strongly disagree	Strongly disagree	Strongly disagree	Strongly disagree	Strongly disagree	Strongly disagree	Strongly disagree	Strongly disagree	Strongly disagree	Strongly disagree	Strongly disagree	Strongly disagree	Strongly disagree	Strongly disagree	Strongly disagree	Strongly disagree	Agree	Disagree	Agree	Strongly agree	Disagree	Strongly disagree	Agree	Rather disagree	Strongly disagree	Agree	Rather disagree	Strongly agree	Rather disagree	Strongly agree	Rather disagree	Agree	Agree	Rather agree	Disagree	Agree	Rather disagree	Rather agree	Strongly disagree	Strongly agree
2018-11-04 16:41:07	Agree	Strongly agree	Strongly agree	Rather agree	Disagree	Rather disagree	Disagree	Neither agree or disagree	Rather agree	Rather disagree	Neither agree or disagree	Disagree	Strongly disagree	Rather disagree	Agree	Neither agree or disagree	Neither agree or disagree	Agree	Agree	Rather disagree	Rather disagree	Disagree	Strongly agree	Strongly agree	Rather disagree	Rather disagree	Disagree	Strongly disagree	Rather agree	Neither agree or disagree	Neither agree or disagree	Rather disagree	Disagree	Agree	Agree	Agree	Strongly agree	Strongly agree	Disagree	Disagree	Disagree	Rather disagree	Neither agree or disagree	Rather agree	Agree	Agree	Disagree	Rather disagree	Strongly agree
2018-11-04 16:41:42	Neither agree or disagree	Rather disagree	Disagree	Rather agree	Agree	Agree	Rather agree	Rather disagree	Rather disagree	Rather agree	Disagree	Rather disagree	Disagree	Disagree	Rather disagree	Rather agree	Disagree	Disagree	Strongly disagree	Strongly disagree	Strongly disagree	Strongly disagree	Rather disagree	Rather disagree	Disagree	Rather disagree	Agree	Rather agree	Rather agree	Rather agree	Rather disagree	Rather agree	Agree	Disagree	Rather disagree	Rather agree	Rather agree	Rather agree	Rather agree	Strongly agree	Rather agree	Disagree	Rather agree	Rather agree	Rather disagree	Rather agree	Rather agree	Rather agree	Rather agree
2018-11-04 16:43:11	Agree	Strongly agree	Rather disagree	Agree	Neither agree or disagree	Rather agree	Rather disagree	Disagree	Rather disagree	Neither agree or disagree	Neither agree or disagree	Rather disagree	Strongly disagree	Neither agree or disagree	Rather agree	Strongly agree	Neither agree or disagree	Neither agree or disagree	Agree	Disagree	Strongly disagree	Neither agree or disagree	Disagree	Rather agree	Neither agree or disagree	Strongly agree	Rather agree	Agree	Agree	Strongly agree	Rather agree	Strongly agree	Strongly disagree	Neither agree or disagree	Rather agree	Agree	Rather agree	Agree	Rather agree	Rather disagree	Disagree	Disagree	Rather agree	Rather disagree	Neither agree or disagree	Disagree	Rather disagree	Strongly disagree	Rather disagree
2018-11-04 17:02:36	Strongly disagree	Neither agree or disagree	Rather disagree	Rather agree	Rather agree	Rather agree	Rather disagree	Rather disagree	Rather disagree	Rather agree	Rather disagree	Rather agree	Neither agree or disagree	Neither agree or disagree	Neither agree or disagree	Neither agree or disagree	Neither agree or disagree	Neither agree or disagree	Neither agree or disagree	Neither agree or disagree	Neither agree or disagree	Neither agree or disagree	Neither agree or disagree	Neither agree or disagree	Neither agree or disagree	Rather agree	Agree	Rather agree	Rather agree	Rather agree	Agree	Rather agree	Strongly agree	Rather agree	Rather agree	Agree	Strongly agree	Strongly agree	Strongly agree	Strongly agree	Rather agree	Rather disagree	Rather disagree	Neither agree or disagree	Rather disagree	Rather agree	Rather disagree	Agree	Strongly agree
2018-11-04 17:09:54	Agree	Strongly agree	Strongly agree	Strongly agree	Agree	Rather agree	Agree	Strongly agree	Strongly agree	Neither agree or disagree	Rather agree	Rather agree	Neither agree or disagree	Neither agree or disagree	Rather disagree	Rather disagree	Disagree	Rather disagree	Strongly disagree	Rather disagree	Neither agree or disagree	Neither agree or disagree	Rather agree	Rather agree	Neither agree or disagree	Rather agree	Rather disagree	Rather agree	Rather disagree	Rather disagree	Neither agree or disagree	Rather agree	Agree	Disagree	Rather agree	Agree	Rather agree	Agree	Rather agree	Strongly agree	Agree	Rather agree	Rather agree	Strongly agree	Disagree	Agree	Rather disagree	Rather agree	Agree
2018-11-04 17:09:57	Rather agree	Neither agree or disagree	Rather agree	Strongly agree	Strongly agree	Strongly agree	Agree	Agree	Strongly agree	Rather agree	Rather agree	Strongly agree	Strongly agree	Strongly agree	Agree	Strongly agree	Rather agree	Strongly agree	Strongly agree	Strongly agree	Strongly agree	Agree	Rather disagree	Neither agree or disagree	Strongly agree	Strongly agree	Neither agree or disagree	Rather disagree	Agree	Neither agree or disagree	Rather agree	Strongly agree	Agree	Strongly agree	Strongly disagree	Strongly agree	Strongly agree	Strongly agree	Strongly agree	Strongly agree	Strongly agree	Strongly agree	Strongly agree	Strongly agree	Strongly agree	Strongly agree	Strongly agree	Strongly agree	Strongly agree
2018-11-04 17:18:20	Strongly disagree	Strongly disagree	Strongly disagree	Strongly agree	Strongly agree	Strongly agree	Strongly agree	Strongly disagree	Strongly disagree	Strongly disagree	Strongly disagree	Strongly disagree	Strongly disagree	Strongly disagree	Strongly disagree	Strongly disagree	Strongly disagree	Strongly disagree	Strongly disagree	Strongly disagree	Strongly disagree	Strongly disagree	Disagree	Strongly disagree	Strongly disagree	Rather agree	Neither agree or disagree	Strongly agree	Strongly agree	Strongly agree	Neither agree or disagree	Strongly agree	Strongly disagree	Strongly disagree	Disagree	Disagree	Strongly agree	Strongly disagree	Strongly agree	Strongly disagree	Strongly agree	Strongly disagree	Strongly disagree	Strongly disagree	Strongly disagree	Strongly disagree	Strongly agree	Strongly disagree	Strongly agree
2018-11-04 17:21:58	Rather disagree	Neither agree or disagree	Rather disagree	Rather agree	Rather agree	Rather agree	Rather disagree	Disagree	Rather disagree	Neither agree or disagree	Strongly disagree	Strongly disagree	Strongly disagree	Strongly disagree	Disagree	Disagree	Rather agree	Disagree	Strongly disagree	Disagree	Neither agree or disagree	Neither agree or disagree	Neither agree or disagree	Neither agree or disagree	Neither agree or disagree	Neither agree or disagree	Rather agree	Rather agree	Rather agree	Neither agree or disagree	Neither agree or disagree	Rather agree	Neither agree or disagree	Neither agree or disagree	Neither agree or disagree	Rather agree	Neither agree or disagree	Neither agree or disagree	Neither agree or disagree	Rather agree	Neither agree or disagree	Neither agree or disagree	Neither agree or disagree	Neither agree or disagree	Neither agree or disagree	Rather agree	Neither agree or disagree	Rather agree	Neither agree or disagree
2018-11-04 17:22:45	Strongly disagree	Strongly disagree	Strongly disagree	Neither agree or disagree	Strongly agree	Strongly agree	Strongly agree	Strongly disagree	Strongly disagree	Strongly disagree	Strongly disagree	Strongly disagree	Strongly disagree	Strongly disagree	Strongly disagree	Strongly disagree	Strongly disagree	Strongly disagree	Strongly disagree	Strongly disagree	Strongly disagree	Strongly disagree	Strongly disagree	Strongly disagree	Neither agree or disagree	Agree	Strongly disagree	Strongly agree	Strongly agree	Agree	Strongly disagree	Strongly agree	Strongly disagree	Strongly disagree	Strongly agree	Neither agree or disagree	Strongly disagree	Strongly disagree	Strongly agree	Neither agree or disagree	Strongly agree	Strongly agree	Strongly disagree	Strongly disagree	Neither agree or disagree	Neither agree or disagree	Agree	Strongly disagree	Disagree
2018-11-04 17:23:51	Strongly disagree	Rather disagree	Neither agree or disagree	Rather agree	Agree	Rather agree	Rather disagree	Neither agree or disagree	Neither agree or disagree	Neither agree or disagree	Rather agree	Rather agree	Strongly disagree	Strongly disagree	Strongly disagree	Strongly disagree	Strongly disagree	Strongly disagree	Strongly disagree	Strongly disagree	Strongly disagree	Strongly disagree	Strongly disagree	Strongly disagree	Strongly disagree	Rather disagree	Strongly agree	Rather agree	Rather agree	Rather agree	Strongly agree	Neither agree or disagree	Rather agree	Agree	Neither agree or disagree	Neither agree or disagree	Strongly agree	Strongly agree	Agree	Agree	Agree	Agree	Strongly disagree	Agree	Rather disagree	Rather disagree	Rather disagree	Neither agree or disagree	Strongly agree
2018-11-04 17:24:23	Neither agree or disagree	Strongly agree	Strongly agree	Strongly agree	Strongly agree	Strongly agree	Strongly agree	Strongly disagree	Strongly disagree	Agree	Strongly agree	Strongly agree	Neither agree or disagree	Neither agree or disagree	Neither agree or disagree	Strongly agree	Strongly disagree	Strongly disagree	Strongly disagree	Strongly disagree	Strongly disagree	Strongly disagree	Neither agree or disagree	Strongly disagree	Strongly disagree	Rather disagree	Agree	Rather agree	Strongly agree	Rather agree	Rather agree	Rather agree	Strongly agree	Strongly disagree	Strongly disagree	Strongly disagree	Rather agree	Strongly disagree	Strongly disagree	Neither agree or disagree	Neither agree or disagree	Rather agree	Strongly disagree	Strongly disagree	Strongly agree	Strongly disagree	Neither agree or disagree	Strongly disagree	Rather agree
2018-11-04 17:36:42	Rather disagree	Strongly disagree	Rather agree	Neither agree or disagree	Rather agree	Agree	Agree	Rather agree	Rather agree	Strongly disagree	Rather disagree	Neither agree or disagree	Rather agree	Rather disagree	Rather disagree	Rather agree	Strongly disagree	Strongly disagree	Strongly disagree	Strongly disagree	Strongly disagree	Strongly disagree	Strongly disagree	Strongly disagree	Strongly disagree	Rather agree	Strongly disagree	Strongly agree	Agree	Strongly disagree	Strongly disagree	Rather agree	Rather agree	Strongly disagree	Strongly agree	Strongly disagree	Strongly agree	Rather agree	Strongly agree	Rather disagree	Strongly agree	Strongly agree	Rather disagree	Rather agree	Strongly disagree	Strongly disagree	Strongly agree	Neither agree or disagree	Strongly agree
2018-11-04 17:41:31	Neither agree or disagree	Neither agree or disagree	Rather disagree	Rather agree	Neither agree or disagree	Rather disagree	Rather disagree	Disagree	Disagree	Disagree	Rather agree	Neither agree or disagree	Neither agree or disagree	Neither agree or disagree	Neither agree or disagree	Neither agree or disagree	Neither agree or disagree	Rather disagree	Rather disagree	Rather disagree	Rather disagree	Rather disagree	Neither agree or disagree	Rather disagree	Rather disagree	Rather agree	Rather agree	Rather agree	Rather agree	Rather agree	Rather agree	Rather agree	Rather agree	Rather disagree	Rather agree	Rather agree	Rather agree	Rather agree	Rather agree	Rather agree	Rather agree	Rather agree	Rather disagree	Rather disagree	Rather disagree	Rather agree	Rather agree	Rather agree	Rather agree
2018-11-04 18:00:23	Rather disagree	Neither agree or disagree	Disagree	Disagree	Agree	Rather agree	Rather disagree	Strongly disagree	Disagree	Rather agree	Neither agree or disagree	Neither agree or disagree	Neither agree or disagree	Neither agree or disagree	Neither agree or disagree	Neither agree or disagree	Neither agree or disagree	Neither agree or disagree	Neither agree or disagree	Neither agree or disagree	Neither agree or disagree	Neither agree or disagree	Neither agree or disagree	Neither agree or disagree	Neither agree or disagree	Rather agree	Agree	Rather agree	Rather disagree	Rather agree	Strongly agree	Rather disagree	Neither agree or disagree	Rather disagree	Rather agree	Rather agree	Rather agree	Rather disagree	Agree	Rather agree	Rather agree	Rather agree	Agree	Rather agree	Rather disagree	Disagree	Agree	Rather agree	Rather disagree
2018-11-04 18:02:19	Rather disagree	Neither agree or disagree	Disagree	Disagree	Agree	Rather agree	Rather disagree	Strongly disagree	Rather disagree	Rather disagree	Neither agree or disagree	Neither agree or disagree	Neither agree or disagree	Neither agree or disagree	Neither agree or disagree	Neither agree or disagree	Neither agree or disagree	Neither agree or disagree	Neither agree or disagree	Neither agree or disagree	Neither agree or disagree	Neither agree or disagree	Neither agree or disagree	Neither agree or disagree	Neither agree or disagree	Rather agree	Agree	Rather agree	Rather agree	Rather agree	Rather agree	Rather agree	Rather agree	Rather agree	Rather disagree	Rather agree	Rather disagree	Rather agree	Rather disagree	Rather agree	Rather disagree	Rather agree	Rather agree	Rather agree	Rather disagree	Rather agree	Rather disagree	Rather agree	Agree
2018-11-04 18:09:54	Rather disagree	Strongly disagree	Strongly agree	Strongly agree	Strongly agree	Strongly agree	Strongly agree	Strongly agree	Agree	Agree	Strongly disagree	Strongly disagree	Strongly disagree	Strongly disagree	Strongly disagree	Strongly disagree	Strongly disagree	Strongly disagree	Strongly disagree	Strongly disagree	Strongly disagree	Strongly disagree	Strongly disagree	Strongly disagree	Strongly disagree	Disagree	Strongly agree	Rather agree	Rather agree	Strongly agree	Strongly agree	Rather disagree	Strongly agree	Rather disagree	Disagree	Strongly agree	Strongly agree	Rather agree	Strongly agree	Strongly agree	Strongly agree	Agree	Agree	Strongly agree	Strongly agree	Agree	Strongly disagree	Rather disagree	Strongly agree
2018-11-04 18:10:08	Strongly disagree	Strongly disagree	Strongly disagree	Strongly disagree	Rather agree	Strongly agree	Strongly disagree	Strongly disagree	Strongly disagree	Strongly disagree	Strongly agree	Strongly agree	Strongly agree	Strongly agree	Strongly agree	Strongly disagree	Strongly agree	Strongly agree	Strongly agree	Strongly disagree	Strongly disagree	Strongly disagree	Strongly agree	Strongly agree	Strongly agree	Strongly agree	Strongly agree	Strongly agree	Strongly agree	Strongly disagree	Strongly agree	Strongly agree	Strongly disagree	Strongly agree	Strongly agree	Strongly agree	Strongly disagree	Strongly disagree	Strongly agree	Strongly agree	Strongly agree	Strongly agree	Strongly agree	Strongly agree	Strongly disagree	Strongly agree	Strongly disagree	Strongly agree	Strongly agree
2018-11-04 18:12:55	Neither agree or disagree	Strongly disagree	Strongly disagree	Rather agree	Neither agree or disagree	Strongly agree	Rather agree	Rather agree	Strongly agree	Strongly disagree	Strongly agree	Strongly agree	Strongly disagree	Strongly disagree	Strongly disagree	Neither agree or disagree	Strongly disagree	Neither agree or disagree	Strongly disagree	Strongly disagree	Strongly disagree	Strongly disagree	Neither agree or disagree	Neither agree or disagree	Neither agree or disagree	Strongly agree	Strongly agree	Strongly agree	Strongly agree	Strongly disagree	Rather agree	Strongly agree	Strongly disagree	Strongly disagree	Strongly agree	Strongly agree	Strongly agree	Disagree	Strongly agree	Strongly disagree	Strongly agree	Strongly agree	Strongly disagree	Strongly disagree	Strongly disagree	Strongly disagree	Rather agree	Strongly disagree	Strongly agree
2018-11-04 18:24:14	Rather disagree	Rather agree	Neither agree or disagree	Rather agree	Rather disagree	Agree	Rather disagree	Rather disagree	Neither agree or disagree	Disagree	Neither agree or disagree	Neither agree or disagree	Rather agree	Neither agree or disagree	Neither agree or disagree	Rather agree	Neither agree or disagree	Neither agree or disagree	Strongly disagree	Neither agree or disagree	Neither agree or disagree	Neither agree or disagree	Neither agree or disagree	Neither agree or disagree	Neither agree or disagree	Agree	Neither agree or disagree	Agree	Agree	Disagree	Neither agree or disagree	Agree	Rather agree	Disagree	Agree	Neither agree or disagree	Agree	Rather disagree	Rather agree	Rather disagree	Rather agree	Rather agree	Neither agree or disagree	Rather disagree	Strongly disagree	Neither agree or disagree	Rather agree	Neither agree or disagree	Agree
2018-11-04 18:33:14	Rather disagree	Rather agree	Rather agree	Rather agree	Agree	Agree	Rather agree	Rather disagree	Rather disagree	Rather disagree	Neither agree or disagree	Rather disagree	Disagree	Disagree	Rather agree	Rather disagree	Rather agree	Rather agree	Neither agree or disagree	Disagree	Disagree	Disagree	Neither agree or disagree	Rather disagree	Neither agree or disagree	Rather agree	Agree	Agree	Rather agree	Rather disagree	Rather agree	Rather agree	Agree	Disagree	Neither agree or disagree	Rather agree	Rather agree	Rather disagree	Neither agree or disagree	Rather agree	Rather agree	Rather disagree	Rather agree	Rather agree	Rather disagree	Rather agree	Rather disagree	Disagree	Agree
2018-11-04 19:16:22	Rather disagree	Rather disagree	Neither agree or disagree	Rather agree	Agree	Rather agree	Rather disagree	Agree	Strongly agree	Rather agree	Disagree	Rather disagree	Disagree	Agree	Agree	Rather disagree	Rather disagree	Rather disagree	Rather disagree	Rather disagree	Rather disagree	Disagree	Rather agree	Rather agree	Agree	Rather disagree	Agree	Rather agree	Rather disagree	Rather agree	Agree	Rather agree	Agree	Rather agree	Rather disagree	Strongly agree	Agree	Agree	Rather agree	Strongly agree	Rather agree	Rather agree	Agree	Rather agree	Disagree	Agree	Rather agree	Rather agree	Rather agree
2018-11-04 20:23:25	Strongly disagree	Rather agree	Strongly disagree	Agree	Rather agree	Strongly agree	Strongly disagree	Disagree	Strongly disagree	Strongly disagree	Neither agree or disagree	Rather agree	Strongly disagree	Neither agree or disagree	Neither agree or disagree	Neither agree or disagree	Strongly disagree	Strongly disagree	Strongly disagree	Strongly disagree	Strongly disagree	Strongly disagree	Neither agree or disagree	Neither agree or disagree	Strongly disagree	Rather agree	Rather disagree	Rather agree	Rather agree	Strongly disagree	Rather disagree	Strongly agree	Strongly disagree	Strongly disagree	Rather agree	Disagree	Neither agree or disagree	Rather disagree	Rather disagree	Rather agree	Rather agree	Rather disagree	Strongly disagree	Strongly disagree	Strongly disagree	Strongly disagree	Rather agree	Strongly disagree	Rather agree
2018-11-04 20:46:33	Neither agree or disagree	Rather agree	Neither agree or disagree	Rather agree	Rather agree	Rather agree	Rather agree	Rather agree	Rather agree	Rather disagree	Rather disagree	Rather disagree	Rather disagree	Rather disagree	Rather disagree	Neither agree or disagree	Neither agree or disagree	Neither agree or disagree	Neither agree or disagree	Neither agree or disagree	Neither agree or disagree	Neither agree or disagree	Neither agree or disagree	Neither agree or disagree	Neither agree or disagree	Rather agree	Rather disagree	Rather agree	Rather disagree	Rather disagree	Rather disagree	Rather agree	Rather agree	Rather disagree	Rather agree	Rather agree	Rather agree	Agree	Rather agree	Strongly agree	Rather agree	Disagree	Rather disagree	Rather agree	Rather disagree	Agree	Rather agree	Strongly agree	Rather agree
2018-11-04 21:47:37	Rather disagree	Disagree	Strongly disagree	Rather agree	Agree	Rather agree	Rather disagree	Rather disagree	Strongly agree	Rather agree	Neither agree or disagree	Rather agree	Neither agree or disagree	Rather agree	Strongly agree	Agree	Rather agree	Rather agree	Rather agree	Rather agree	Rather agree	Rather agree	Agree	Strongly agree	Strongly agree	Disagree	Agree	Agree	Agree	Rather agree	Strongly agree	Strongly agree	Strongly agree	Rather agree	Rather disagree	Strongly agree	Strongly disagree	Neither agree or disagree	Agree	Strongly agree	Agree	Strongly disagree	Rather agree	Strongly agree	Rather agree	Disagree	Strongly disagree	Rather disagree	Strongly agree
2018-11-04 21:54:13	Strongly disagree	Strongly disagree	Strongly disagree	Strongly disagree	Neither agree or disagree	Rather agree	Strongly disagree	Strongly disagree	Strongly disagree	Strongly disagree	Strongly disagree	Strongly disagree	Strongly disagree	Strongly disagree	Strongly disagree	Neither agree or disagree	Strongly disagree	Strongly disagree	Strongly disagree	Strongly disagree	Neither agree or disagree	Neither agree or disagree	Strongly disagree	Strongly disagree	Strongly disagree	Rather agree	Rather disagree	Strongly agree	Rather agree	Rather disagree	Rather disagree	Agree	Disagree	Strongly disagree	Rather disagree	Rather agree	Rather disagree	Agree	Neither agree or disagree	Strongly agree	Rather agree	Rather disagree	Agree	Rather disagree	Disagree	Rather agree	Disagree	Strongly agree	Rather agree
2018-11-04 22:02:28	Strongly disagree	Strongly disagree	Strongly disagree	Strongly disagree	Rather agree	Rather agree	Rather disagree	Strongly disagree	Strongly disagree	Strongly disagree	Neither agree or disagree	Neither agree or disagree	Neither agree or disagree	Neither agree or disagree	Neither agree or disagree	Neither agree or disagree	Neither agree or disagree	Neither agree or disagree	Neither agree or disagree	Neither agree or disagree	Neither agree or disagree	Neither agree or disagree	Neither agree or disagree	Neither agree or disagree	Neither agree or disagree	Rather agree	Rather disagree	Strongly agree	Rather agree	Agree	Rather agree	Agree	Rather agree	Strongly disagree	Rather agree	Rather disagree	Strongly agree	Strongly disagree	Strongly agree	Strongly disagree	Strongly agree	Strongly agree	Rather disagree	Rather disagree	Strongly disagree	Strongly disagree	Strongly agree	Strongly disagree	Strongly agree
2018-11-04 22:04:52	Strongly disagree	Disagree	Strongly disagree	Strongly agree	Neither agree or disagree	Strongly agree	Disagree	Strongly disagree	Rather agree	Strongly disagree	Rather agree	Agree	Disagree	Strongly disagree	Strongly disagree	Strongly agree	Strongly disagree	Strongly disagree	Strongly disagree	Strongly disagree	Strongly disagree	Strongly disagree	Neither agree or disagree	Rather disagree	Disagree	Strongly agree	Strongly disagree	Strongly agree	Strongly agree	Strongly disagree	Disagree	Strongly agree	Disagree	Strongly disagree	Strongly agree	Disagree	Agree	Strongly disagree	Agree	Disagree	Strongly agree	Rather agree	Disagree	Disagree	Strongly disagree	Rather disagree	Agree	Rather agree	Agree
2018-11-05 09:41:31	Rather disagree	Rather agree	Rather agree	Rather agree	Rather agree	Rather agree	Rather agree	Strongly disagree	Strongly disagree	Disagree	Rather agree	Rather agree	Rather agree	Rather agree	Rather agree	Neither agree or disagree	Neither agree or disagree	Neither agree or disagree	Neither agree or disagree	Neither agree or disagree	Neither agree or disagree	Neither agree or disagree	Neither agree or disagree	Neither agree or disagree	Neither agree or disagree	Rather agree	Strongly disagree	Agree	Agree	Strongly disagree	Strongly disagree	Rather agree	Strongly disagree	Strongly disagree	Rather agree	Strongly disagree	Rather agree	Strongly disagree	Agree	Disagree	Rather agree	Agree	Strongly disagree	Strongly disagree	Strongly disagree	Strongly disagree	Rather agree	Strongly disagree	Agree
2018-11-05 09:43:31	Rather disagree	Agree	Agree	Agree	Agree	Agree	Agree	Agree	Agree	Agree	Rather agree	Strongly agree	Strongly agree	Strongly agree	Strongly agree	Strongly agree	Rather disagree	Disagree	Neither agree or disagree	Rather disagree	Rather disagree	Rather disagree	Strongly agree	Strongly agree	Strongly agree	Agree	Disagree	Agree	Rather agree	Strongly disagree	Strongly disagree	Agree	Strongly disagree	Strongly disagree	Agree	Strongly disagree	Agree	Disagree	Rather agree	Disagree	Agree	Agree	Disagree	Disagree	Strongly disagree	Strongly disagree	Rather agree	Strongly disagree	Rather agree
2018-11-05 12:58:16	Strongly disagree	Neither agree or disagree	Strongly disagree	Rather agree	Rather agree	Rather agree	Rather disagree	Strongly disagree	Strongly disagree	Strongly disagree	Strongly disagree	Strongly disagree	Strongly disagree	Strongly disagree	Strongly disagree	Strongly disagree	Strongly disagree	Strongly disagree	Strongly disagree	Strongly disagree	Strongly disagree	Strongly disagree	Strongly disagree	Strongly disagree	Strongly disagree	Rather agree	Strongly disagree	Rather agree	Rather agree	Strongly disagree	Strongly disagree	Rather agree	Neither agree or disagree	Strongly disagree	Agree	Rather agree	Rather agree	Neither agree or disagree	Rather agree	Rather disagree	Rather agree	Rather agree	Rather disagree	Disagree	Rather disagree	Rather disagree	Rather agree	Strongly disagree	Agree
2018-11-05 17:54:35	Strongly disagree	Neither agree or disagree	Neither agree or disagree	Rather agree	Agree	Agree	Rather agree	Rather disagree	Agree	Strongly disagree	Rather agree	Neither agree or disagree	Disagree	Neither agree or disagree	Strongly disagree	Neither agree or disagree	Strongly disagree	Strongly disagree	Strongly disagree	Neither agree or disagree	Neither agree or disagree	Neither agree or disagree	Neither agree or disagree	Neither agree or disagree	Neither agree or disagree	Rather agree	Rather disagree	Strongly agree	Strongly agree	Strongly disagree	Strongly disagree	Strongly agree	Neither agree or disagree	Strongly disagree	Agree	Rather disagree	Strongly agree	Rather disagree	Agree	Strongly disagree	Strongly agree	Rather agree	Strongly disagree	Disagree	Strongly disagree	Strongly disagree	Strongly agree	Rather agree	Rather agree
2018-11-05 17:56:25	Neither agree or disagree	Neither agree or disagree	Rather agree	Rather agree	Rather agree	Agree	Rather agree	Rather disagree	Rather disagree	Disagree	Rather disagree	Rather disagree	Rather disagree	Disagree	Neither agree or disagree	Neither agree or disagree	Neither agree or disagree	Neither agree or disagree	Disagree	Disagree	Rather disagree	Rather disagree	Disagree	Rather disagree	Rather disagree	Rather agree	Rather agree	Rather agree	Rather disagree	Rather agree	Rather agree	Neither agree or disagree	Rather agree	Rather agree	Neither agree or disagree	Rather agree	Rather agree	Rather agree	Rather agree	Rather agree	Rather agree	Rather agree	Rather agree	Neither agree or disagree	Rather disagree	Rather agree	Rather disagree	Neither agree or disagree	Rather agree
2018-11-05 18:00:59	Rather agree	Strongly agree	Agree	Agree	Strongly agree	Strongly agree	Rather agree	Strongly agree	Strongly agree	Rather disagree	Rather agree	Neither agree or disagree	Disagree	Strongly disagree	Strongly disagree	Strongly disagree	Strongly disagree	Strongly disagree	Strongly disagree	Strongly disagree	Strongly disagree	Strongly disagree	Strongly disagree	Neither agree or disagree	Strongly disagree	Rather agree	Agree	Rather agree	Rather agree	Rather disagree	Rather agree	Agree	Agree	Strongly disagree	Rather agree	Agree	Rather agree	Rather agree	Strongly agree	Agree	Agree	Rather disagree	Rather agree	Rather agree	Rather disagree	Neither agree or disagree	Agree	Agree	Rather disagree
2018-11-05 18:01:59	Neither agree or disagree	Neither agree or disagree	Neither agree or disagree	Neither agree or disagree	Neither agree or disagree	Neither agree or disagree	Neither agree or disagree	Neither agree or disagree	Neither agree or disagree	Neither agree or disagree	Neither agree or disagree	Neither agree or disagree	Neither agree or disagree	Neither agree or disagree	Neither agree or disagree	Neither agree or disagree	Neither agree or disagree	Neither agree or disagree	Neither agree or disagree	Neither agree or disagree	Neither agree or disagree	Neither agree or disagree	Neither agree or disagree	Neither agree or disagree	Neither agree or disagree	Rather agree	Disagree	Agree	Rather agree	Neither agree or disagree	Rather disagree	Rather agree	Neither agree or disagree	Strongly disagree	Rather agree	Rather agree	Agree	Rather agree	Neither agree or disagree	Agree	Rather agree	Neither agree or disagree	Neither agree or disagree	Rather disagree	Disagree	Agree	Rather disagree	Agree	Agree
2018-11-05 18:07:55	Rather agree	Rather agree	Neither agree or disagree	Rather agree	Agree	Agree	Rather agree	Disagree	Rather disagree	Neither agree or disagree	Rather disagree	Agree	Neither agree or disagree	Neither agree or disagree	Rather agree	Neither agree or disagree	Rather disagree	Neither agree or disagree	Disagree	Disagree	Disagree	Disagree	Neither agree or disagree	Neither agree or disagree	Neither agree or disagree	Agree	Neither agree or disagree	Rather agree	Agree	Rather disagree	Rather disagree	Rather agree	Neither agree or disagree	Rather disagree	Rather agree	Rather agree	Rather agree	Rather agree	Rather agree	Rather agree	Rather agree	Rather agree	Neither agree or disagree	Rather agree	Disagree	Rather agree	Rather agree	Rather disagree	Strongly agree
2018-11-05 18:13:41	Neither agree or disagree	Rather disagree	Rather disagree	Agree	Neither agree or disagree	Rather agree	Neither agree or disagree	Rather disagree	Strongly disagree	Strongly disagree	Neither agree or disagree	Neither agree or disagree	Neither agree or disagree	Neither agree or disagree	Neither agree or disagree	Neither agree or disagree	Neither agree or disagree	Neither agree or disagree	Neither agree or disagree	Neither agree or disagree	Neither agree or disagree	Neither agree or disagree	Neither agree or disagree	Neither agree or disagree	Neither agree or disagree	Rather agree	Neither agree or disagree	Rather agree	Rather agree	Rather agree	Neither agree or disagree	Rather agree	Rather agree	Rather disagree	Neither agree or disagree	Rather agree	Neither agree or disagree	Rather disagree	Strongly agree	Agree	Agree	Rather agree	Rather disagree	Neither agree or disagree	Disagree	Neither agree or disagree	Rather agree	Neither agree or disagree	Neither agree or disagree
2018-11-05 18:19:56	Neither agree or disagree	Disagree	Disagree	Agree	Agree	Agree	Rather agree	Strongly disagree	Disagree	Strongly disagree	Neither agree or disagree	Neither agree or disagree	Neither agree or disagree	Disagree	Neither agree or disagree	Neither agree or disagree	Neither agree or disagree	Neither agree or disagree	Neither agree or disagree	Neither agree or disagree	Neither agree or disagree	Neither agree or disagree	Neither agree or disagree	Neither agree or disagree	Neither agree or disagree	Agree	Rather disagree	Agree	Agree	Disagree	Strongly disagree	Neither agree or disagree	Neither agree or disagree	Neither agree or disagree	Rather agree	Strongly agree	Agree	Rather agree	Agree	Agree	Agree	Neither agree or disagree	Agree	Neither agree or disagree	Disagree	Rather agree	Neither agree or disagree	Strongly agree	Agree
2018-11-05 18:21:06	Neither agree or disagree	Neither agree or disagree	Rather disagree	Rather agree	Rather agree	Strongly agree	Rather agree	Strongly disagree	Strongly disagree	Strongly disagree	Rather agree	Neither agree or disagree	Neither agree or disagree	Rather agree	Neither agree or disagree	Rather agree	Neither agree or disagree	Neither agree or disagree	Neither agree or disagree	Neither agree or disagree	Neither agree or disagree	Neither agree or disagree	Neither agree or disagree	Neither agree or disagree	Rather agree	Strongly agree	Strongly agree	Agree	Strongly agree	Rather disagree	Strongly agree	Strongly agree	Rather disagree	Strongly disagree	Strongly agree	Neither agree or disagree	Rather agree	Rather disagree	Rather agree	Rather agree	Agree	Rather agree	Rather disagree	Rather disagree	Disagree	Rather disagree	Strongly agree	Agree	Strongly agree
2018-11-05 18:21:20	Rather disagree	Rather agree	Rather agree	Rather agree	Strongly agree	Strongly agree	Agree	Rather disagree	Rather disagree	Disagree	Rather agree	Rather agree	Neither agree or disagree	Rather agree	Rather agree	Rather disagree	Rather agree	Rather agree	Rather disagree	Rather disagree	Rather disagree	Rather disagree	Rather disagree	Rather agree	Rather disagree	Rather agree	Agree	Agree	Rather agree	Rather disagree	Rather disagree	Rather agree	Rather agree	Rather disagree	Rather agree	Rather agree	Rather agree	Rather agree	Rather agree	Rather agree	Rather agree	Rather agree	Rather disagree	Rather disagree	Rather disagree	Rather agree	Agree	Rather agree	Agree
2018-11-05 18:26:26	Strongly disagree	Agree	Disagree	Strongly agree	Agree	Strongly agree	Rather agree	Neither agree or disagree	Rather agree	Disagree	Strongly disagree	Disagree	Strongly disagree	Strongly disagree	Disagree	Strongly disagree	Neither agree or disagree	Disagree	Strongly disagree	Strongly disagree	Strongly disagree	Strongly disagree	Strongly disagree	Strongly disagree	Strongly disagree	Rather disagree	Rather agree	Agree	Rather agree	Neither agree or disagree	Rather disagree	Strongly agree	Strongly agree	Strongly disagree	Rather agree	Neither agree or disagree	Rather disagree	Agree	Rather agree	Agree	Neither agree or disagree	Rather agree	Rather agree	Rather disagree	Disagree	Agree	Disagree	Agree	Strongly agree
2018-11-05 18:26:53	Neither agree or disagree	Strongly disagree	Strongly disagree	Neither agree or disagree	Strongly agree	Agree	Neither agree or disagree	Disagree	Rather disagree	Neither agree or disagree	Rather disagree	Rather agree	Rather agree	Neither agree or disagree	Rather agree	Agree	Disagree	Rather disagree	Agree	Agree	Rather disagree	Neither agree or disagree	Neither agree or disagree	Neither agree or disagree	Neither agree or disagree	Rather disagree	Neither agree or disagree	Neither agree or disagree	Neither agree or disagree	Rather agree	Disagree	Neither agree or disagree	Rather disagree	Agree	Rather agree	Rather agree	Rather agree	Agree	Rather agree	Neither agree or disagree	Rather disagree	Disagree	Rather disagree	Rather disagree	Neither agree or disagree	Rather disagree	Neither agree or disagree	Agree	Rather disagree
2018-11-05 18:27:07	Rather disagree	Neither agree or disagree	Rather disagree	Rather agree	Rather agree	Agree	Rather disagree	Disagree	Rather disagree	Rather disagree	Strongly disagree	Strongly disagree	Strongly disagree	Disagree	Strongly disagree	Neither agree or disagree	Strongly disagree	Strongly disagree	Strongly disagree	Strongly disagree	Strongly disagree	Strongly disagree	Strongly disagree	Strongly disagree	Strongly disagree	Rather agree	Rather disagree	Strongly agree	Strongly agree	Strongly disagree	Rather disagree	Strongly agree	Neither agree or disagree	Disagree	Strongly agree	Strongly disagree	Strongly agree	Strongly disagree	Strongly agree	Strongly disagree	Agree	Strongly disagree	Neither agree or disagree	Neither agree or disagree	Neither agree or disagree	Neither agree or disagree	Neither agree or disagree	Neither agree or disagree	Strongly agree
2018-11-05 18:28:01	Rather disagree	Neither agree or disagree	Rather disagree	Rather agree	Rather agree	Rather agree	Rather disagree	Rather disagree	Rather disagree	Disagree	Neither agree or disagree	Neither agree or disagree	Neither agree or disagree	Disagree	Disagree	Neither agree or disagree	Disagree	Disagree	Disagree	Disagree	Disagree	Disagree	Neither agree or disagree	Disagree	Disagree	Agree	Disagree	Strongly agree	Agree	Disagree	Disagree	Agree	Rather disagree	Disagree	Agree	Rather disagree	Agree	Disagree	Agree	Rather disagree	Agree	Agree	Rather disagree	Rather disagree	Disagree	Rather disagree	Agree	Rather disagree	Rather agree
2018-11-05 18:28:24	Rather disagree	Neither agree or disagree	Rather disagree	Rather agree	Rather agree	Rather agree	Rather disagree	Rather disagree	Rather disagree	Disagree	Neither agree or disagree	Neither agree or disagree	Neither agree or disagree	Disagree	Disagree	Neither agree or disagree	Disagree	Disagree	Disagree	Disagree	Disagree	Disagree	Neither agree or disagree	Disagree	Disagree	Agree	Disagree	Strongly agree	Agree	Disagree	Disagree	Agree	Rather disagree	Disagree	Agree	Rather disagree	Agree	Disagree	Agree	Rather disagree	Agree	Agree	Rather disagree	Rather disagree	Disagree	Rather disagree	Agree	Rather disagree	Rather agree
2018-11-05 18:30:57	Strongly disagree	Strongly disagree	Strongly disagree	Rather agree	Agree	Strongly agree	Neither agree or disagree	Neither agree or disagree	Rather disagree	Rather disagree	Rather disagree	Rather agree	Rather disagree	Neither agree or disagree	Neither agree or disagree	Neither agree or disagree	Strongly agree	Strongly agree	Rather agree	Rather disagree	Disagree	Rather disagree	Neither agree or disagree	Rather disagree	Neither agree or disagree	Rather agree	Disagree	Agree	Strongly agree	Disagree	Disagree	Strongly agree	Strongly disagree	Disagree	Agree	Rather agree	Agree	Rather disagree	Strongly agree	Rather disagree	Agree	Rather agree	Neither agree or disagree	Neither agree or disagree	Rather disagree	Rather agree	Agree	Agree	Agree
2018-11-05 18:34:10	Strongly disagree	Strongly disagree	Strongly disagree	Strongly agree	Strongly agree	Strongly agree	Strongly disagree	Strongly disagree	Rather disagree	Strongly disagree	Strongly disagree	Strongly disagree	Strongly disagree	Strongly disagree	Strongly disagree	Strongly disagree	Strongly disagree	Strongly disagree	Strongly disagree	Strongly disagree	Strongly disagree	Strongly disagree	Strongly disagree	Strongly disagree	Strongly disagree	Strongly agree	Strongly agree	Strongly agree	Strongly agree	Disagree	Strongly agree	Strongly agree	Strongly disagree	Strongly agree	Strongly agree	Strongly disagree	Strongly agree	Neither agree or disagree	Strongly agree	Strongly disagree	Rather agree	Strongly agree	Rather agree	Strongly disagree	Strongly disagree	Neither agree or disagree	Strongly agree	Disagree	Strongly agree
2018-11-05 18:42:47	Rather disagree	Rather disagree	Rather disagree	Neither agree or disagree	Rather agree	Rather agree	Neither agree or disagree	Rather disagree	Rather disagree	Strongly disagree	Neither agree or disagree	Rather agree	Neither agree or disagree	Rather agree	Rather agree	Neither agree or disagree	Neither agree or disagree	Rather disagree	Rather disagree	Rather disagree	Rather disagree	Rather disagree	Neither agree or disagree	Neither agree or disagree	Neither agree or disagree	Rather agree	Rather disagree	Strongly agree	Agree	Rather disagree	Rather disagree	Rather agree	Rather agree	Rather disagree	Rather agree	Rather disagree	Rather agree	Rather disagree	Agree	Rather disagree	Rather agree	Rather agree	Neither agree or disagree	Rather disagree	Rather disagree	Rather disagree	Rather agree	Rather disagree	Rather agree
2018-11-05 19:00:17	Neither agree or disagree	Rather disagree	Disagree	Rather agree	Rather agree	Agree	Rather agree	Disagree	Strongly disagree	Strongly disagree	Strongly disagree	Strongly disagree	Strongly disagree	Strongly disagree	Strongly disagree	Rather disagree	Strongly disagree	Strongly disagree	Strongly disagree	Strongly disagree	Strongly disagree	Strongly disagree	Strongly disagree	Strongly disagree	Strongly disagree	Neither agree or disagree	Rather agree	Neither agree or disagree	Neither agree or disagree	Rather agree	Agree	Rather disagree	Neither agree or disagree	Rather agree	Rather disagree	Agree	Neither agree or disagree	Rather agree	Neither agree or disagree	Strongly agree	Rather disagree	Rather disagree	Strongly agree	Neither agree or disagree	Neither agree or disagree	Neither agree or disagree	Rather disagree	Neither agree or disagree	Rather disagree
2018-11-05 19:01:03	Strongly disagree	Strongly disagree	Strongly disagree	Strongly disagree	Strongly disagree	Strongly disagree	Strongly disagree	Strongly disagree	Strongly disagree	Rather agree	Rather disagree	Strongly disagree	Strongly disagree	Strongly disagree	Strongly disagree	Strongly disagree	Strongly disagree	Strongly disagree	Strongly disagree	Strongly disagree	Strongly disagree	Strongly disagree	Strongly disagree	Strongly disagree	Agree	Rather agree	Neither agree or disagree	Agree	Rather disagree	Disagree	Rather disagree	Rather disagree	Disagree	Rather disagree	Agree	Rather disagree	Rather agree	Agree	Rather agree	Rather agree	Disagree	Rather agree	Strongly agree	Neither agree or disagree	Neither agree or disagree	Rather agree	Neither agree or disagree	Rather agree	Rather agree
2018-11-05 19:12:56	Rather disagree	Rather disagree	Rather agree	Rather agree	Rather agree	Rather agree	Rather disagree	Rather disagree	Rather disagree	Rather disagree	Neither agree or disagree	Rather agree	Rather agree	Neither agree or disagree	Neither agree or disagree	Neither agree or disagree	Neither agree or disagree	Neither agree or disagree	Neither agree or disagree	Neither agree or disagree	Neither agree or disagree	Neither agree or disagree	Neither agree or disagree	Neither agree or disagree	Neither agree or disagree	Strongly agree	Strongly disagree	Agree	Agree	Strongly disagree	Disagree	Rather agree	Strongly disagree	Strongly disagree	Agree	Strongly disagree	Rather agree	Strongly disagree	Agree	Strongly disagree	Rather agree	Agree	Strongly disagree	Strongly disagree	Strongly disagree	Strongly disagree	Rather agree	Strongly disagree	Rather agree
2018-11-05 19:15:34	Strongly disagree	Strongly disagree	Strongly disagree	Agree	Rather agree	Rather agree	Strongly disagree	Strongly disagree	Strongly disagree	Strongly disagree	Neither agree or disagree	Rather agree	Strongly disagree	Strongly disagree	Disagree	Rather disagree	Rather disagree	Disagree	Strongly disagree	Strongly disagree	Rather disagree	Strongly disagree	Strongly disagree	Neither agree or disagree	Neither agree or disagree	Agree	Strongly disagree	Agree	Agree	Strongly disagree	Strongly disagree	Agree	Strongly disagree	Strongly disagree	Agree	Strongly disagree	Rather agree	Strongly disagree	Rather agree	Strongly disagree	Rather agree	Rather agree	Strongly disagree	Strongly disagree	Strongly disagree	Strongly disagree	Rather agree	Strongly disagree	Agree
2018-11-05 19:17:55	Rather agree	Rather agree	Rather agree	Rather agree	Rather agree	Rather agree	Rather agree	Disagree	Disagree	Disagree	Agree	Agree	Agree	Agree	Agree	Agree	Neither agree or disagree	Rather agree	Neither agree or disagree	Neither agree or disagree	Neither agree or disagree	Rather agree	Rather agree	Rather agree	Rather agree	Agree	Strongly disagree	Rather agree	Rather agree	Strongly disagree	Strongly disagree	Agree	Strongly disagree	Strongly disagree	Strongly agree	Strongly disagree	Strongly agree	Strongly disagree	Rather agree	Strongly disagree	Agree	Agree	Strongly disagree	Strongly disagree	Strongly disagree	Strongly disagree	Rather agree	Strongly disagree	Rather agree
2018-11-05 19:19:09	Neither agree or disagree	Neither agree or disagree	Neither agree or disagree	Rather agree	Rather agree	Rather agree	Rather disagree	Rather disagree	Rather agree	Rather disagree	Rather disagree	Rather disagree	Neither agree or disagree	Rather disagree	Strongly disagree	Strongly disagree	Strongly disagree	Strongly disagree	Strongly disagree	Neither agree or disagree	Neither agree or disagree	Neither agree or disagree	Neither agree or disagree	Neither agree or disagree	Neither agree or disagree	Rather agree	Rather disagree	Rather agree	Rather agree	Rather agree	Rather agree	Rather agree	Rather disagree	Rather disagree	Rather agree	Rather disagree	Rather agree	Rather agree	Rather agree	Rather agree	Rather agree	Strongly agree	Rather disagree	Rather disagree	Rather disagree	Rather disagree	Neither agree or disagree	Rather disagree	Agree
2018-11-05 19:20:38	Neither agree or disagree	Rather disagree	Strongly disagree	Rather agree	Rather agree	Rather agree	Rather disagree	Strongly disagree	Strongly disagree	Strongly disagree	Rather disagree	Rather disagree	Rather disagree	Neither agree or disagree	Neither agree or disagree	Neither agree or disagree	Neither agree or disagree	Neither agree or disagree	Neither agree or disagree	Neither agree or disagree	Neither agree or disagree	Neither agree or disagree	Neither agree or disagree	Neither agree or disagree	Neither agree or disagree	Rather agree	Neither agree or disagree	Rather agree	Neither agree or disagree	Neither agree or disagree	Rather disagree	Rather agree	Rather agree	Rather disagree	Neither agree or disagree	Rather agree	Agree	Disagree	Neither agree or disagree	Rather agree	Rather agree	Rather agree	Rather agree	Rather agree	Strongly disagree	Neither agree or disagree	Rather agree	Rather agree	Agree
2018-11-05 19:25:18	Neither agree or disagree	Neither agree or disagree	Rather disagree	Neither agree or disagree	Rather agree	Rather agree	Rather disagree	Neither agree or disagree	Agree	Disagree	Neither agree or disagree	Rather agree	Disagree	Disagree	Disagree	Neither agree or disagree	Strongly disagree	Disagree	Strongly disagree	Disagree	Strongly disagree	Strongly disagree	Disagree	Rather disagree	Rather disagree	Agree	Rather disagree	Agree	Rather agree	Rather disagree	Rather disagree	Agree	Disagree	Strongly disagree	Agree	Rather disagree	Agree	Rather disagree	Strongly agree	Disagree	Agree	Rather agree	Rather disagree	Rather disagree	Agree	Rather disagree	Agree	Rather disagree	Agree
2018-11-05 19:34:41	Neither agree or disagree	Neither agree or disagree	Neither agree or disagree	Agree	Rather agree	Rather agree	Neither agree or disagree	Rather disagree	Rather disagree	Neither agree or disagree	Neither agree or disagree	Agree	Neither agree or disagree	Neither agree or disagree	Neither agree or disagree	Neither agree or disagree	Rather disagree	Neither agree or disagree	Strongly disagree	Strongly disagree	Strongly disagree	Strongly disagree	Neither agree or disagree	Neither agree or disagree	Neither agree or disagree	Disagree	Strongly agree	Rather agree	Rather agree	Agree	Strongly agree	Rather agree	Strongly agree	Agree	Rather disagree	Strongly agree	Neither agree or disagree	Agree	Neither agree or disagree	Agree	Rather disagree	Neither agree or disagree	Strongly agree	Agree	Rather disagree	Strongly agree	Rather disagree	Strongly agree	Agree
2018-11-05 19:47:24	Agree	Disagree	Rather agree	Strongly agree	Rather agree	Agree	Rather agree	Rather agree	Agree	Rather agree	Neither agree or disagree	Rather agree	Neither agree or disagree	Strongly disagree	Strongly disagree	Rather agree	Strongly disagree	Strongly disagree	Strongly disagree	Strongly disagree	Strongly disagree	Strongly disagree	Strongly disagree	Strongly disagree	Strongly disagree	Rather agree	Strongly agree	Rather agree	Rather agree	Rather disagree	Agree	Neither agree or disagree	Rather agree	Rather disagree	Agree	Rather agree	Rather agree	Rather disagree	Agree	Rather agree	Strongly agree	Rather disagree	Rather agree	Disagree	Strongly disagree	Rather agree	Rather agree	Rather agree	Agree
2018-11-05 19:53:46	Disagree	Disagree	Disagree	Neither agree or disagree	Neither agree or disagree	Rather disagree	Neither agree or disagree	Rather disagree	Neither agree or disagree	Strongly disagree	Rather agree	Agree	Rather agree	Rather disagree	Rather agree	Rather agree	Disagree	Strongly disagree	Strongly disagree	Rather disagree	Disagree	Disagree	Neither agree or disagree	Disagree	Neither agree or disagree	Rather agree	Rather disagree	Rather agree	Rather agree	Rather disagree	Rather disagree	Agree	Rather disagree	Strongly disagree	Agree	Disagree	Agree	Rather agree	Agree	Rather agree	Agree	Rather agree	Rather disagree	Disagree	Strongly disagree	Disagree	Agree	Neither agree or disagree	Rather agree
2018-11-05 20:08:28	Rather disagree	Rather agree	Disagree	Strongly agree	Rather agree	Rather disagree	Strongly disagree	Strongly disagree	Rather disagree	Strongly disagree	Disagree	Disagree	Strongly disagree	Disagree	Disagree	Strongly disagree	Disagree	Disagree	Strongly disagree	Strongly disagree	Strongly disagree	Strongly disagree	Strongly disagree	Strongly disagree	Strongly disagree	Agree	Rather agree	Agree	Agree	Disagree	Neither agree or disagree	Agree	Rather agree	Strongly disagree	Rather agree	Rather disagree	Agree	Agree	Strongly agree	Neither agree or disagree	Rather agree	Agree	Rather disagree	Strongly disagree	Disagree	Disagree	Agree	Strongly disagree	Strongly agree
2018-11-05 20:08:31	Rather disagree	Rather agree	Disagree	Rather disagree	Strongly agree	Agree	Rather agree	Rather disagree	Rather agree	Strongly disagree	Agree	Neither agree or disagree	Disagree	Disagree	Rather disagree	Neither agree or disagree	Rather disagree	Rather disagree	Strongly disagree	Disagree	Disagree	Rather disagree	Neither agree or disagree	Neither agree or disagree	Neither agree or disagree	Strongly agree	Strongly agree	Neither agree or disagree	Rather agree	Rather disagree	Strongly agree	Rather agree	Agree	Neither agree or disagree	Rather disagree	Agree	Rather agree	Agree	Strongly agree	Strongly agree	Strongly agree	Agree	Rather agree	Strongly agree	Strongly disagree	Rather agree	Neither agree or disagree	Rather agree	Rather agree
2018-11-05 20:08:59	Rather agree	Strongly agree	Rather agree	Strongly agree	Agree	Rather agree	Neither agree or disagree	Rather agree	Rather agree	Rather agree	Neither agree or disagree	Neither agree or disagree	Neither agree or disagree	Neither agree or disagree	Neither agree or disagree	Neither agree or disagree	Neither agree or disagree	Neither agree or disagree	Neither agree or disagree	Neither agree or disagree	Neither agree or disagree	Neither agree or disagree	Neither agree or disagree	Neither agree or disagree	Neither agree or disagree	Agree	Rather disagree	Rather agree	Agree	Rather agree	Rather disagree	Rather agree	Rather disagree	Strongly disagree	Rather agree	Rather disagree	Rather agree	Rather disagree	Rather agree	Rather disagree	Rather agree	Rather agree	Rather disagree	Rather disagree	Disagree	Rather disagree	Rather agree	Neither agree or disagree	Rather agree
2018-11-05 20:11:49	Neither agree or disagree	Rather agree	Neither agree or disagree	Neither agree or disagree	Rather agree	Rather agree	Neither agree or disagree	Rather disagree	Rather disagree	Disagree	Neither agree or disagree	Neither agree or disagree	Rather disagree	Disagree	Disagree	Disagree	Rather disagree	Rather disagree	Rather disagree	Rather disagree	Rather disagree	Rather disagree	Rather disagree	Rather disagree	Rather disagree	Rather agree	Rather disagree	Rather agree	Rather agree	Rather disagree	Rather disagree	Rather agree	Rather agree	Rather disagree	Rather agree	Rather disagree	Rather agree	Rather agree	Rather agree	Agree	Rather agree	Rather agree	Rather agree	Rather agree	Rather disagree	Rather disagree	Rather agree	Rather agree	Rather agree
2018-11-05 20:14:38	Rather disagree	Neither agree or disagree	Neither agree or disagree	Rather agree	Rather agree	Agree	Rather agree	Disagree	Strongly disagree	Strongly disagree	Strongly disagree	Strongly disagree	Strongly disagree	Strongly disagree	Strongly disagree	Strongly disagree	Strongly disagree	Strongly disagree	Strongly disagree	Disagree	Disagree	Strongly disagree	Strongly disagree	Strongly disagree	Strongly disagree	Neither agree or disagree	Rather disagree	Rather agree	Rather agree	Agree	Neither agree or disagree	Rather agree	Neither agree or disagree	Disagree	Neither agree or disagree	Neither agree or disagree	Neither agree or disagree	Neither agree or disagree	Rather agree	Rather disagree	Rather agree	Agree	Rather disagree	Strongly disagree	Strongly disagree	Rather disagree	Rather agree	Agree	Rather agree
2018-11-05 20:16:11	Strongly disagree	Strongly disagree	Strongly disagree	Rather agree	Agree	Rather agree	Agree	Strongly disagree	Strongly disagree	Strongly disagree	Rather agree	Neither agree or disagree	Neither agree or disagree	Strongly agree	Strongly agree	Neither agree or disagree	Neither agree or disagree	Rather agree	Rather agree	Strongly disagree	Strongly disagree	Strongly disagree	Rather agree	Rather agree	Rather agree	Rather agree	Neither agree or disagree	Rather agree	Strongly agree	Disagree	Rather disagree	Strongly agree	Strongly disagree	Neither agree or disagree	Strongly agree	Rather agree	Strongly agree	Rather agree	Strongly agree	Strongly agree	Strongly agree	Rather agree	Rather disagree	Strongly disagree	Strongly disagree	Rather disagree	Rather agree	Rather disagree	Strongly agree
2018-11-05 20:21:22	Rather agree	Rather agree	Neither agree or disagree	Neither agree or disagree	Strongly agree	Agree	Rather agree	Disagree	Neither agree or disagree	Strongly disagree	Rather agree	Agree	Rather agree	Agree	Agree	Rather agree	Rather agree	Rather agree	Strongly disagree	Disagree	Disagree	Disagree	Neither agree or disagree	Neither agree or disagree	Rather agree	Agree	Strongly disagree	Agree	Agree	Disagree	Disagree	Agree	Neither agree or disagree	Disagree	Agree	Disagree	Agree	Disagree	Rather agree	Rather agree	Strongly agree	Strongly agree	Rather disagree	Rather agree	Strongly disagree	Rather disagree	Agree	Rather agree	Agree
2018-11-05 20:25:17	Rather agree	Rather agree	Rather agree	Strongly agree	Strongly agree	Strongly agree	Strongly agree	Disagree	Rather disagree	Neither agree or disagree	Rather agree	Rather agree	Neither agree or disagree	Neither agree or disagree	Neither agree or disagree	Neither agree or disagree	Neither agree or disagree	Neither agree or disagree	Neither agree or disagree	Neither agree or disagree	Neither agree or disagree	Neither agree or disagree	Neither agree or disagree	Neither agree or disagree	Neither agree or disagree	Rather agree	Neither agree or disagree	Rather agree	Strongly agree	Disagree	Neither agree or disagree	Rather agree	Neither agree or disagree	Disagree	Rather agree	Neither agree or disagree	Rather agree	Rather disagree	Rather agree	Rather disagree	Rather agree	Agree	Neither agree or disagree	Neither agree or disagree	Disagree	Neither agree or disagree	Rather agree	Rather disagree	Agree
2018-11-05 20:26:21	Strongly agree	Disagree	Strongly disagree	Strongly agree	Agree	Agree	Disagree	Strongly disagree	Disagree	Strongly disagree	Disagree	Neither agree or disagree	Neither agree or disagree	Neither agree or disagree	Neither agree or disagree	Neither agree or disagree	Disagree	Disagree	Strongly disagree	Disagree	Disagree	Disagree	Neither agree or disagree	Disagree	Disagree	Rather agree	Rather agree	Agree	Agree	Agree	Agree	Rather disagree	Rather agree	Rather agree	Rather disagree	Agree	Rather agree	Rather disagree	Rather disagree	Agree	Rather agree	Agree	Agree	Rather disagree	Rather disagree	Agree	Rather agree	Rather agree	Agree
2018-11-05 20:52:17	Strongly disagree	Rather agree	Disagree	Neither agree or disagree	Agree	Strongly agree	Rather agree	Strongly disagree	Disagree	Strongly disagree	Rather agree	Strongly agree	Rather agree	Rather agree	Rather agree	Neither agree or disagree	Neither agree or disagree	Neither agree or disagree	Disagree	Strongly disagree	Neither agree or disagree	Rather agree	Rather agree	Neither agree or disagree	Rather agree	Rather agree	Rather disagree	Rather agree	Rather agree	Rather agree	Rather disagree	Rather agree	Rather agree	Disagree	Rather agree	Rather agree	Rather agree	Rather disagree	Rather disagree	Rather agree	Rather agree	Rather agree	Agree	Rather agree	Strongly disagree	Rather agree	Rather agree	Rather agree	Disagree
2018-11-05 20:58:44	Rather agree	Rather agree	Agree	Agree	Agree	Strongly agree	Strongly agree	Rather agree	Rather disagree	Strongly disagree	Rather disagree	Agree	Neither agree or disagree	Rather disagree	Agree	Rather disagree	Rather disagree	Rather disagree	Strongly disagree	Rather disagree	Disagree	Rather disagree	Rather disagree	Rather agree	Rather agree	Rather agree	Agree	Agree	Rather agree	Rather agree	Strongly agree	Rather agree	Rather agree	Rather disagree	Rather disagree	Agree	Rather agree	Rather disagree	Agree	Agree	Rather agree	Strongly agree	Rather disagree	Rather disagree	Disagree	Rather disagree	Rather agree	Agree	Rather agree
2018-11-05 20:59:02	Rather disagree	Rather agree	Rather disagree	Rather agree	Agree	Agree	Rather disagree	Rather agree	Neither agree or disagree	Rather disagree	Rather agree	Rather agree	Rather agree	Disagree	Rather disagree	Neither agree or disagree	Rather disagree	Rather disagree	Rather disagree	Rather disagree	Rather disagree	Rather disagree	Rather disagree	Rather disagree	Rather disagree	Rather agree	Strongly agree	Rather disagree	Rather disagree	Agree	Strongly agree	Rather disagree	Strongly agree	Strongly agree	Rather agree	Agree	Rather agree	Agree	Strongly agree	Agree	Rather agree	Neither agree or disagree	Strongly agree	Strongly agree	Rather disagree	Agree	Rather agree	Agree	Rather agree
2018-11-05 21:02:26	Neither agree or disagree	Disagree	Disagree	Strongly agree	Strongly agree	Strongly agree	Rather agree	Strongly agree	Strongly agree	Strongly agree	Neither agree or disagree	Neither agree or disagree	Neither agree or disagree	Neither agree or disagree	Neither agree or disagree	Neither agree or disagree	Neither agree or disagree	Neither agree or disagree	Neither agree or disagree	Neither agree or disagree	Neither agree or disagree	Neither agree or disagree	Neither agree or disagree	Neither agree or disagree	Neither agree or disagree	Neither agree or disagree	Rather agree	Neither agree or disagree	Agree	Rather agree	Rather agree	Neither agree or disagree	Rather agree	Rather agree	Rather disagree	Strongly disagree	Strongly agree	Strongly disagree	Rather agree	Rather agree	Rather agree	Strongly disagree	Strongly agree	Rather disagree	Strongly disagree	Strongly agree	Agree	Rather agree	Strongly agree
2018-11-05 21:04:02	Agree	Strongly agree	Rather agree	Strongly agree	Agree	Strongly agree	Agree	Agree	Rather agree	Rather disagree	Rather disagree	Strongly agree	Agree	Strongly agree	Strongly agree	Rather agree	Agree	Agree	Strongly agree	Strongly agree	Agree	Agree	Agree	Agree	Agree	Agree	Agree	Agree	Agree	Agree	Agree	Agree	Agree	Agree	Agree	Agree	Agree	Agree	Rather agree	Rather disagree	Agree	Agree	Agree	Agree	Agree	Agree	Agree	Agree	Neither agree or disagree
2018-11-05 21:30:15	Neither agree or disagree	Neither agree or disagree	Neither agree or disagree	Neither agree or disagree	Neither agree or disagree	Neither agree or disagree	Neither agree or disagree	Neither agree or disagree	Rather disagree	Agree	Strongly disagree	Rather disagree	Rather agree	Neither agree or disagree	Neither agree or disagree	Neither agree or disagree	Neither agree or disagree	Neither agree or disagree	Strongly disagree	Neither agree or disagree	Neither agree or disagree	Neither agree or disagree	Neither agree or disagree	Neither agree or disagree	Neither agree or disagree	Strongly agree	Strongly disagree	Strongly agree	Strongly agree	Strongly disagree	Strongly disagree	Strongly agree	Strongly disagree	Strongly disagree	Strongly agree	Rather disagree	Strongly agree	Rather disagree	Strongly agree	Rather disagree	Strongly agree	Strongly agree	Rather disagree	Rather disagree	Strongly disagree	Rather disagree	Strongly agree	Rather disagree	Strongly agree
2018-11-05 21:45:33	Rather agree	Strongly agree	Rather agree	Strongly agree	Strongly agree	Strongly agree	Agree	Rather agree	Strongly agree	Agree	Neither agree or disagree	Strongly agree	Agree	Rather agree	Strongly agree	Neither agree or disagree	Rather agree	Agree	Rather disagree	Disagree	Strongly disagree	Disagree	Rather disagree	Disagree	Neither agree or disagree	Rather disagree	Rather disagree	Rather agree	Rather disagree	Rather disagree	Neither agree or disagree	Rather agree	Agree	Agree	Neither agree or disagree	Neither agree or disagree	Rather agree	Disagree	Disagree	Disagree	Rather agree	Rather agree	Rather agree	Agree	Strongly disagree	Disagree	Rather agree	Rather disagree	Neither agree or disagree
2018-11-05 22:07:26	Strongly disagree	Strongly disagree	Strongly disagree	Strongly disagree	Rather agree	Rather agree	Strongly disagree	Strongly disagree	Strongly disagree	Strongly disagree	Strongly disagree	Strongly disagree	Strongly disagree	Strongly disagree	Strongly disagree	Strongly disagree	Strongly disagree	Strongly disagree	Strongly disagree	Strongly disagree	Strongly disagree	Strongly disagree	Strongly disagree	Strongly disagree	Strongly disagree	Rather agree	Rather disagree	Agree	Rather agree	Disagree	Rather agree	Agree	Disagree	Disagree	Rather agree	Disagree	Agree	Disagree	Rather agree	Rather disagree	Agree	Agree	Rather disagree	Disagree	Disagree	Disagree	Agree	Rather disagree	Agree
2018-11-05 22:38:24	Rather disagree	Disagree	Rather disagree	Rather agree	Rather agree	Agree	Rather agree	Strongly disagree	Strongly disagree	Disagree	Neither agree or disagree	Neither agree or disagree	Rather disagree	Neither agree or disagree	Neither agree or disagree	Neither agree or disagree	Neither agree or disagree	Neither agree or disagree	Strongly disagree	Strongly disagree	Strongly disagree	Strongly disagree	Neither agree or disagree	Neither agree or disagree	Neither agree or disagree	Rather agree	Rather disagree	Agree	Agree	Rather disagree	Rather disagree	Agree	Disagree	Disagree	Rather agree	Rather disagree	Rather agree	Rather disagree	Rather agree	Rather disagree	Rather agree	Agree	Rather disagree	Rather disagree	Disagree	Disagree	Rather agree	Rather agree	Agree
2018-11-05 22:38:40	Neither agree or disagree	Neither agree or disagree	Strongly disagree	Neither agree or disagree	Rather disagree	Rather agree	Rather disagree	Strongly disagree	Disagree	Strongly disagree	Neither agree or disagree	Neither agree or disagree	Neither agree or disagree	Rather disagree	Neither agree or disagree	Neither agree or disagree	Strongly disagree	Strongly disagree	Neither agree or disagree	Neither agree or disagree	Neither agree or disagree	Neither agree or disagree	Neither agree or disagree	Neither agree or disagree	Neither agree or disagree	Rather agree	Agree	Rather agree	Rather agree	Rather agree	Rather agree	Rather agree	Rather agree	Rather agree	Neither agree or disagree	Neither agree or disagree	Rather agree	Rather agree	Rather agree	Rather agree	Rather agree	Rather agree	Neither agree or disagree	Rather agree	Neither agree or disagree	Rather disagree	Rather agree	Rather agree	Rather agree
2018-11-05 22:47:07	Agree	Rather agree	Agree	Agree	Strongly agree	Strongly agree	Agree	Rather agree	Rather agree	Strongly agree	Rather disagree	Rather agree	Rather agree	Rather agree	Agree	Disagree	Agree	Agree	Rather agree	Neither agree or disagree	Neither agree or disagree	Neither agree or disagree	Neither agree or disagree	Neither agree or disagree	Neither agree or disagree	Rather agree	Neither agree or disagree	Agree	Agree	Neither agree or disagree	Agree	Neither agree or disagree	Agree	Neither agree or disagree	Rather agree	Strongly agree	Rather agree	Rather agree	Rather agree	Rather agree	Neither agree or disagree	Agree	Rather agree	Rather disagree	Disagree	Rather agree	Rather disagree	Rather agree	Rather agree
2018-11-06 07:02:02	Rather agree	Agree	Rather agree	Agree	Agree	Agree	Rather agree	Rather disagree	Neither agree or disagree	Disagree	Rather agree	Rather agree	Neither agree or disagree	Neither agree or disagree	Neither agree or disagree	Neither agree or disagree	Neither agree or disagree	Neither agree or disagree	Strongly disagree	Neither agree or disagree	Neither agree or disagree	Rather agree	Neither agree or disagree	Neither agree or disagree	Neither agree or disagree	Strongly agree	Rather agree	Strongly agree	Agree	Rather disagree	Rather agree	Strongly agree	Disagree	Disagree	Agree	Disagree	Agree	Disagree	Agree	Rather disagree	Agree	Agree	Rather disagree	Disagree	Strongly disagree	Disagree	Strongly agree	Strongly disagree	Strongly agree
2018-11-06 08:47:04	Strongly disagree	Neither agree or disagree	Rather disagree	Agree	Strongly agree	Rather agree	Neither agree or disagree	Rather disagree	Rather disagree	Strongly disagree	Strongly disagree	Strongly disagree	Strongly disagree	Neither agree or disagree	Neither agree or disagree	Neither agree or disagree	Neither agree or disagree	Neither agree or disagree	Neither agree or disagree	Neither agree or disagree	Neither agree or disagree	Neither agree or disagree	Neither agree or disagree	Neither agree or disagree	Neither agree or disagree	Agree	Rather disagree	Agree	Rather agree	Rather disagree	Rather agree	Agree	Neither agree or disagree	Strongly disagree	Strongly agree	Neither agree or disagree	Strongly agree	Strongly disagree	Agree	Neither agree or disagree	Agree	Strongly agree	Disagree	Strongly disagree	Strongly disagree	Rather agree	Strongly agree	Rather agree	Strongly agree
2018-11-06 18:37:38	Rather disagree	Rather agree	Rather agree	Agree	Strongly agree	Agree	Rather disagree	Rather disagree	Rather disagree	Strongly disagree	Rather agree	Neither agree or disagree	Disagree	Rather disagree	Neither agree or disagree	Rather agree	Rather agree	Rather disagree	Strongly disagree	Strongly disagree	Strongly disagree	Strongly disagree	Disagree	Disagree	Neither agree or disagree	Agree	Strongly disagree	Strongly agree	Rather disagree	Rather disagree	Strongly disagree	Agree	Rather agree	Strongly disagree	Agree	Rather agree	Agree	Rather agree	Rather agree	Rather agree	Agree	Rather disagree	Rather disagree	Disagree	Agree	Rather agree	Rather agree	Strongly disagree	Strongly agree
2018-11-06 18:39:27	Agree	Strongly agree	Strongly agree	Strongly agree	Strongly agree	Strongly agree	Strongly agree	Rather agree	Agree	Strongly disagree	Neither agree or disagree	Neither agree or disagree	Rather disagree	Rather agree	Neither agree or disagree	Neither agree or disagree	Neither agree or disagree	Rather agree	Strongly disagree	Neither agree or disagree	Disagree	Disagree	Rather agree	Neither agree or disagree	Rather agree	Agree	Agree	Agree	Strongly agree	Rather disagree	Rather agree	Agree	Rather agree	Rather disagree	Rather agree	Rather agree	Strongly agree	Agree	Agree	Rather agree	Rather agree	Agree	Neither agree or disagree	Neither agree or disagree	Disagree	Neither agree or disagree	Rather agree	Rather agree	Strongly agree
2018-11-06 22:29:17	Rather agree	Rather agree	Rather agree	Strongly agree	Agree	Rather agree	Rather agree	Strongly disagree	Strongly disagree	Strongly disagree	Rather disagree	Rather disagree	Disagree	Rather disagree	Rather disagree	Rather disagree	Disagree	Disagree	Disagree	Disagree	Disagree	Disagree	Disagree	Disagree	Disagree	Agree	Rather disagree	Agree	Agree	Disagree	Rather disagree	Rather agree	Rather disagree	Strongly disagree	Agree	Agree	Agree	Rather agree	Agree	Rather agree	Agree	Rather disagree	Rather disagree	Rather agree	Strongly disagree	Rather disagree	Rather agree	Rather disagree	Agree
2018-11-07 08:16:19	Rather disagree	Rather agree	Rather agree	Rather agree	Rather agree	Rather agree	Strongly disagree	Strongly disagree	Disagree	Disagree	Rather agree	Rather agree	Rather agree	Rather agree	Rather agree	Rather agree	Strongly disagree	Disagree	Disagree	Disagree	Disagree	Disagree	Disagree	Disagree	Disagree	Rather agree	Disagree	Rather agree	Strongly agree	Strongly disagree	Strongly disagree	Strongly agree	Strongly disagree	Strongly disagree	Agree	Disagree	Rather agree	Disagree	Agree	Strongly disagree	Agree	Agree	Disagree	Strongly disagree	Strongly disagree	Strongly disagree	Rather agree	Disagree	Rather agree
2018-11-07 08:18:21	Strongly disagree	Agree	Agree	Agree	Strongly agree	Strongly agree	Strongly agree	Rather disagree	Rather agree	Rather agree	Rather agree	Agree	Agree	Strongly agree	Strongly agree	Strongly agree	Rather agree	Rather agree	Strongly disagree	Strongly disagree	Strongly disagree	Strongly disagree	Rather agree	Rather agree	Rather agree	Strongly agree	Strongly disagree	Agree	Agree	Strongly disagree	Strongly disagree	Agree	Strongly disagree	Strongly disagree	Agree	Strongly disagree	Strongly agree	Strongly disagree	Strongly agree	Strongly disagree	Agree	Rather agree	Strongly disagree	Strongly disagree	Strongly disagree	Strongly disagree	Rather agree	Strongly disagree	Rather agree
2018-11-07 09:23:03	Strongly disagree	Strongly disagree	Strongly disagree	Strongly disagree	Neither agree or disagree	Rather disagree	Rather disagree	Strongly disagree	Disagree	Strongly disagree	Neither agree or disagree	Neither agree or disagree	Rather disagree	Disagree	Neither agree or disagree	Neither agree or disagree	Strongly disagree	Strongly disagree	Strongly disagree	Strongly disagree	Strongly disagree	Strongly disagree	Strongly disagree	Strongly disagree	Neither agree or disagree	Agree	Rather disagree	Agree	Strongly agree	Disagree	Rather agree	Agree	Disagree	Strongly disagree	Agree	Rather agree	Agree	Rather disagree	Agree	Strongly disagree	Agree	Agree	Rather disagree	Strongly disagree	Disagree	Rather disagree	Agree	Disagree	Agree
2018-11-07 11:50:29	Strongly disagree	Agree	Agree	Rather disagree	Rather disagree	Strongly disagree	Rather disagree	Neither agree or disagree	Rather agree	Neither agree or disagree	Disagree	Neither agree or disagree	Rather agree	Neither agree or disagree	Disagree	Neither agree or disagree	Neither agree or disagree	Neither agree or disagree	Rather disagree	Neither agree or disagree	Rather agree	Strongly agree	Neither agree or disagree	Rather agree	Neither agree or disagree	Rather agree	Disagree	Agree	Rather disagree	Neither agree or disagree	Neither agree or disagree	Strongly agree	Rather agree	Rather disagree	Strongly disagree	Rather agree	Rather agree	Neither agree or disagree	Disagree	Neither agree or disagree	Strongly disagree	Strongly disagree	Neither agree or disagree	Neither agree or disagree	Agree	Agree	Neither agree or disagree	Rather disagree	Rather disagree
2018-11-07 11:52:07	Rather agree	Agree	Neither agree or disagree	Rather disagree	Rather disagree	Rather agree	Agree	Neither agree or disagree	Rather disagree	Rather disagree	Disagree	Rather disagree	Rather disagree	Rather disagree	Rather disagree	Neither agree or disagree	Rather agree	Agree	Strongly agree	Disagree	Disagree	Disagree	Disagree	Rather disagree	Disagree	Neither agree or disagree	Disagree	Strongly disagree	Rather disagree	Rather disagree	Rather disagree	Rather disagree	Rather agree	Rather agree	Rather disagree	Rather agree	Neither agree or disagree	Disagree	Disagree	Neither agree or disagree	Agree	Rather disagree	Rather agree	Strongly disagree	Disagree	Neither agree or disagree	Rather disagree	Rather disagree	Rather agree
2018-11-07 13:37:42	Rather agree	Rather disagree	Rather agree	Strongly agree	Strongly agree	Strongly agree	Agree	Rather agree	Agree	Agree	Rather agree	Rather agree	Rather agree	Neither agree or disagree	Rather agree	Agree	Neither agree or disagree	Neither agree or disagree	Neither agree or disagree	Rather disagree	Rather disagree	Neither agree or disagree	Rather agree	Neither agree or disagree	Rather agree	Rather agree	Rather disagree	Rather agree	Rather agree	Rather disagree	Rather disagree	Rather agree	Rather disagree	Rather disagree	Rather agree	Rather disagree	Rather agree	Rather disagree	Rather agree	Rather disagree	Rather agree	Rather agree	Rather disagree	Rather disagree	Rather disagree	Rather disagree	Rather agree	Rather disagree	Rather agree
2018-11-07 13:47:06	Agree	Neither agree or disagree	Rather agree	Agree	Strongly agree	Agree	Agree	Neither agree or disagree	Rather disagree	Strongly disagree	Neither agree or disagree	Neither agree or disagree	Neither agree or disagree	Neither agree or disagree	Neither agree or disagree	Neither agree or disagree	Neither agree or disagree	Rather agree	Neither agree or disagree	Rather agree	Rather disagree	Rather agree	Neither agree or disagree	Rather agree	Rather agree	Strongly agree	Neither agree or disagree	Strongly agree	Strongly agree	Rather agree	Rather disagree	Rather agree	Strongly agree	Neither agree or disagree	Strongly agree	Agree	Agree	Rather agree	Strongly agree	Disagree	Strongly agree	Strongly agree	Rather disagree	Disagree	Disagree	Strongly disagree	Strongly agree	Rather disagree	Agree
2018-11-07 13:53:50	Strongly disagree	Strongly disagree	Strongly disagree	Strongly disagree	Strongly disagree	Rather agree	Strongly disagree	Strongly disagree	Strongly disagree	Strongly disagree	Strongly disagree	Strongly disagree	Strongly disagree	Strongly disagree	Strongly disagree	Strongly disagree	Strongly disagree	Strongly disagree	Strongly disagree	Strongly disagree	Strongly disagree	Strongly disagree	Strongly disagree	Strongly disagree	Strongly disagree	Strongly agree	Strongly disagree	Strongly agree	Strongly agree	Strongly disagree	Strongly disagree	Strongly agree	Strongly disagree	Strongly disagree	Strongly agree	Agree	Strongly agree	Agree	Strongly agree	Strongly agree	Strongly agree	Strongly agree	Strongly agree	Strongly agree	Strongly disagree	Strongly disagree	Strongly agree	Rather agree	Strongly agree
2018-11-07 13:57:28	Strongly disagree	Strongly disagree	Strongly disagree	Strongly disagree	Neither agree or disagree	Rather disagree	Strongly disagree	Strongly disagree	Strongly disagree	Strongly disagree	Strongly disagree	Strongly disagree	Strongly disagree	Strongly disagree	Strongly disagree	Strongly disagree	Strongly disagree	Strongly disagree	Strongly disagree	Strongly disagree	Strongly disagree	Strongly disagree	Strongly disagree	Strongly disagree	Strongly disagree	Agree	Rather disagree	Strongly agree	Agree	Disagree	Disagree	Strongly agree	Agree	Strongly disagree	Agree	Disagree	Strongly agree	Rather disagree	Agree	Disagree	Agree	Agree	Disagree	Disagree	Strongly disagree	Rather disagree	Strongly agree	Rather agree	Agree
2018-11-07 14:02:47	Agree	Strongly agree	Strongly agree	Strongly agree	Rather agree	Strongly agree	Strongly agree	Rather agree	Neither agree or disagree	Neither agree or disagree	Agree	Rather agree	Agree	Rather agree	Agree	Rather agree	Rather disagree	Rather disagree	Rather disagree	Rather disagree	Rather disagree	Rather disagree	Neither agree or disagree	Neither agree or disagree	Neither agree or disagree	Agree	Rather disagree	Agree	Agree	Rather disagree	Rather disagree	Rather agree	Rather agree	Strongly disagree	Rather agree	Rather agree	Strongly agree	Rather disagree	Rather agree	Rather agree	Agree	Rather agree	Rather disagree	Rather disagree	Disagree	Rather disagree	Rather agree	Strongly disagree	Rather agree
2018-11-07 14:09:14	Neither agree or disagree	Rather disagree	Rather agree	Rather agree	Rather agree	Rather agree	Rather agree	Rather disagree	Rather disagree	Strongly disagree	Rather disagree	Rather disagree	Disagree	Disagree	Disagree	Neither agree or disagree	Neither agree or disagree	Neither agree or disagree	Neither agree or disagree	Neither agree or disagree	Neither agree or disagree	Neither agree or disagree	Neither agree or disagree	Neither agree or disagree	Neither agree or disagree	Rather agree	Rather disagree	Rather agree	Rather agree	Rather disagree	Rather disagree	Rather agree	Rather disagree	Rather disagree	Rather agree	Rather disagree	Neither agree or disagree	Rather disagree	Rather agree	Rather disagree	Rather agree	Rather agree	Neither agree or disagree	Neither agree or disagree	Rather disagree	Rather disagree	Rather agree	Neither agree or disagree	Rather agree
2018-11-07 14:09:14	Strongly disagree	Strongly disagree	Strongly disagree	Strongly disagree	Strongly disagree	Strongly disagree	Strongly disagree	Strongly disagree	Strongly disagree	Strongly disagree	Neither agree or disagree	Neither agree or disagree	Neither agree or disagree	Neither agree or disagree	Neither agree or disagree	Neither agree or disagree	Neither agree or disagree	Neither agree or disagree	Neither agree or disagree	Neither agree or disagree	Neither agree or disagree	Rather agree	Disagree	Disagree	Disagree	Rather disagree	Neither agree or disagree	Strongly disagree	Neither agree or disagree	Strongly disagree	Strongly disagree	Strongly disagree	Strongly disagree	Strongly disagree	Strongly disagree	Strongly disagree	Strongly disagree	Strongly disagree	Strongly disagree	Strongly disagree	Strongly disagree	Strongly disagree	Strongly disagree	Strongly disagree	Strongly disagree	Strongly disagree	Strongly disagree	Strongly disagree	Strongly disagree
2018-11-07 14:10:01	Disagree	Strongly disagree	Disagree	Disagree	Agree	Agree	Disagree	Strongly disagree	Strongly disagree	Strongly disagree	Strongly disagree	Strongly disagree	Strongly disagree	Rather disagree	Neither agree or disagree	Neither agree or disagree	Neither agree or disagree	Neither agree or disagree	Neither agree or disagree	Strongly disagree	Strongly disagree	Strongly disagree	Rather agree	Strongly agree	Strongly agree	Strongly agree	Strongly agree	Strongly agree	Strongly agree	Strongly disagree	Neither agree or disagree	Strongly agree	Disagree	Strongly disagree	Strongly agree	Rather agree	Rather agree	Agree	Strongly agree	Agree	Strongly agree	Rather agree	Disagree	Neither agree or disagree	Neither agree or disagree	Rather agree	Strongly agree	Strongly disagree	Strongly agree
2018-11-07 14:11:24	Rather agree	Agree	Agree	Strongly agree	Strongly agree	Strongly agree	Rather agree	Rather disagree	Rather disagree	Disagree	Rather agree	Agree	Rather agree	Rather disagree	Rather agree	Neither agree or disagree	Strongly disagree	Strongly disagree	Strongly disagree	Strongly disagree	Strongly disagree	Strongly disagree	Strongly disagree	Strongly disagree	Strongly disagree	Rather agree	Rather disagree	Agree	Rather agree	Disagree	Rather disagree	Rather agree	Agree	Strongly disagree	Neither agree or disagree	Rather agree	Agree	Rather agree	Rather agree	Agree	Rather agree	Rather agree	Rather disagree	Rather agree	Strongly disagree	Disagree	Rather agree	Strongly agree	Rather agree
2018-11-07 14:11:55	Neither agree or disagree	Neither agree or disagree	Rather disagree	Agree	Neither agree or disagree	Rather agree	Rather disagree	Neither agree or disagree	Neither agree or disagree	Neither agree or disagree	Neither agree or disagree	Neither agree or disagree	Neither agree or disagree	Neither agree or disagree	Neither agree or disagree	Neither agree or disagree	Neither agree or disagree	Strongly agree	Rather agree	Rather disagree	Rather agree	Strongly disagree	Strongly agree	Neither agree or disagree	Strongly agree	Strongly agree	Strongly disagree	Agree	Agree	Rather disagree	Strongly agree	Agree	Neither agree or disagree	Rather disagree	Strongly agree	Strongly agree	Strongly agree	Agree	Agree	Neither agree or disagree	Strongly agree	Strongly agree	Strongly agree	Rather disagree	Neither agree or disagree	Agree	Strongly agree	Neither agree or disagree	Agree
2018-11-07 14:13:10	Rather agree	Neither agree or disagree	Disagree	Agree	Neither agree or disagree	Rather agree	Rather agree	Rather agree	Rather disagree	Strongly disagree	Neither agree or disagree	Neither agree or disagree	Neither agree or disagree	Neither agree or disagree	Neither agree or disagree	Neither agree or disagree	Strongly disagree	Strongly disagree	Strongly disagree	Strongly disagree	Strongly disagree	Strongly disagree	Strongly disagree	Strongly disagree	Strongly disagree	Rather agree	Rather agree	Agree	Strongly agree	Strongly disagree	Disagree	Strongly agree	Rather agree	Strongly disagree	Agree	Rather agree	Strongly agree	Rather disagree	Agree	Disagree	Agree	Rather disagree	Rather agree	Neither agree or disagree	Disagree	Strongly disagree	Rather agree	Neither agree or disagree	Strongly agree
2018-11-07 14:13:59	Rather disagree	Strongly disagree	Disagree	Strongly disagree	Agree	Rather agree	Strongly disagree	Disagree	Disagree	Rather disagree	Strongly disagree	Neither agree or disagree	Disagree	Neither agree or disagree	Rather agree	Rather agree	Neither agree or disagree	Neither agree or disagree	Rather disagree	Disagree	Disagree	Disagree	Rather agree	Rather agree	Neither agree or disagree	Rather disagree	Strongly disagree	Strongly agree	Rather agree	Rather agree	Rather disagree	Agree	Strongly agree	Disagree	Rather agree	Strongly disagree	Rather agree	Rather agree	Rather agree	Agree	Agree	Rather agree	Agree	Agree	Agree	Rather agree	Rather disagree	Agree	Strongly agree
2018-11-07 14:25:35	Rather agree	Strongly disagree	Strongly disagree	Strongly agree	Rather agree	Strongly agree	Rather disagree	Rather agree	Rather agree	Rather agree	Rather disagree	Neither agree or disagree	Rather disagree	Neither agree or disagree	Rather agree	Rather disagree	Rather disagree	Rather disagree	Rather disagree	Rather disagree	Rather disagree	Rather disagree	Rather disagree	Rather disagree	Rather disagree	Rather agree	Rather disagree	Rather agree	Rather agree	Rather disagree	Rather disagree	Rather agree	Rather disagree	Strongly disagree	Rather agree	Rather disagree	Rather agree	Rather disagree	Rather agree	Rather disagree	Rather agree	Rather agree	Rather disagree	Strongly disagree	Rather disagree	Rather disagree	Rather agree	Rather disagree	Rather agree
2018-11-07 14:26:45	Agree	Agree	Agree	Rather agree	Strongly agree	Strongly agree	Rather agree	Rather agree	Rather disagree	Agree	Rather agree	Rather agree	Neither agree or disagree	Agree	Agree	Rather agree	Rather agree	Rather agree	Rather agree	Rather agree	Rather agree	Rather agree	Agree	Rather agree	Rather agree	Rather disagree	Strongly agree	Rather agree	Rather agree	Rather agree	Strongly agree	Neither agree or disagree	Rather disagree	Rather agree	Neither agree or disagree	Strongly agree	Agree	Rather agree	Rather agree	Strongly agree	Agree	Agree	Agree	Rather agree	Rather disagree	Strongly agree	Rather disagree	Strongly agree	Strongly agree
2018-11-07 14:36:37	Agree	Agree	Rather agree	Agree	Agree	Agree	Agree	Neither agree or disagree	Rather disagree	Disagree	Rather disagree	Neither agree or disagree	Neither agree or disagree	Neither agree or disagree	Neither agree or disagree	Neither agree or disagree	Neither agree or disagree	Neither agree or disagree	Neither agree or disagree	Neither agree or disagree	Neither agree or disagree	Neither agree or disagree	Neither agree or disagree	Rather agree	Rather agree	Rather agree	Rather agree	Rather agree	Agree	Rather disagree	Rather disagree	Rather agree	Agree	Rather disagree	Rather agree	Rather agree	Agree	Rather disagree	Rather agree	Rather agree	Rather agree	Rather agree	Rather disagree	Rather agree	Disagree	Rather agree	Rather agree	Rather disagree	Agree
2018-11-07 14:48:22	Rather agree	Strongly disagree	Rather disagree	Neither agree or disagree	Rather agree	Rather agree	Rather disagree	Rather agree	Rather agree	Rather disagree	Strongly disagree	Strongly disagree	Strongly disagree	Strongly disagree	Neither agree or disagree	Disagree	Strongly disagree	Strongly disagree	Strongly disagree	Strongly disagree	Strongly disagree	Strongly disagree	Strongly disagree	Strongly disagree	Strongly disagree	Agree	Agree	Strongly agree	Strongly agree	Rather disagree	Rather agree	Strongly agree	Agree	Disagree	Agree	Rather agree	Rather agree	Disagree	Strongly agree	Rather disagree	Strongly agree	Strongly agree	Agree	Rather disagree	Strongly disagree	Rather disagree	Strongly agree	Strongly disagree	Strongly agree
2018-11-07 15:00:58	Rather disagree	Strongly agree	Rather agree	Agree	Strongly agree	Strongly agree	Rather agree	Rather agree	Rather agree	Rather agree	Neither agree or disagree	Agree	Rather disagree	Agree	Strongly agree	Agree	Rather agree	Rather agree	Rather disagree	Strongly disagree	Strongly disagree	Disagree	Strongly disagree	Strongly disagree	Strongly disagree	Agree	Disagree	Strongly agree	Strongly agree	Strongly disagree	Disagree	Strongly agree	Rather disagree	Strongly disagree	Strongly agree	Rather agree	Rather agree	Rather agree	Rather agree	Rather agree	Agree	Rather agree	Strongly disagree	Rather agree	Strongly disagree	Agree	Rather agree	Rather agree	Strongly agree
2018-11-07 15:54:56	Strongly disagree	Neither agree or disagree	Rather disagree	Neither agree or disagree	Strongly agree	Agree	Rather agree	Rather disagree	Rather disagree	Strongly disagree	Neither agree or disagree	Neither agree or disagree	Disagree	Neither agree or disagree	Neither agree or disagree	Neither agree or disagree	Neither agree or disagree	Rather disagree	Strongly disagree	Strongly disagree	Disagree	Strongly disagree	Disagree	Strongly disagree	Disagree	Rather agree	Rather disagree	Agree	Agree	Rather disagree	Disagree	Agree	Rather agree	Disagree	Rather agree	Agree	Neither agree or disagree	Neither agree or disagree	Agree	Agree	Agree	Rather agree	Neither agree or disagree	Rather agree	Disagree	Rather agree	Rather agree	Disagree	Rather agree
2018-11-07 16:37:47	Rather disagree	Neither agree or disagree	Rather disagree	Disagree	Rather agree	Rather agree	Neither agree or disagree	Strongly disagree	Disagree	Strongly disagree	Neither agree or disagree	Neither agree or disagree	Neither agree or disagree	Neither agree or disagree	Neither agree or disagree	Neither agree or disagree	Strongly disagree	Strongly disagree	Strongly disagree	Strongly disagree	Strongly disagree	Strongly disagree	Strongly disagree	Strongly disagree	Strongly disagree	Strongly agree	Strongly disagree	Strongly agree	Strongly agree	Strongly disagree	Strongly disagree	Agree	Strongly disagree	Strongly disagree	Strongly agree	Strongly disagree	Agree	Strongly disagree	Agree	Strongly disagree	Agree	Strongly agree	Rather agree	Strongly disagree	Strongly disagree	Strongly disagree	Agree	Strongly disagree	Strongly agree
2018-11-07 17:31:50	Strongly disagree	Strongly disagree	Strongly disagree	Strongly disagree	Rather disagree	Strongly disagree	Strongly disagree	Strongly disagree	Strongly disagree	Strongly disagree	Strongly disagree	Strongly disagree	Strongly disagree	Neither agree or disagree	Rather agree	Rather agree	Rather disagree	Disagree	Strongly disagree	Strongly disagree	Strongly disagree	Strongly disagree	Rather agree	Rather agree	Rather agree	Rather agree	Disagree	Strongly agree	Rather agree	Rather disagree	Strongly disagree	Rather agree	Neither agree or disagree	Strongly disagree	Strongly agree	Disagree	Strongly agree	Rather disagree	Agree	Disagree	Agree	Rather agree	Agree	Disagree	Strongly disagree	Rather agree	Rather agree	Disagree	Strongly agree
2018-11-07 18:01:05	Neither agree or disagree	Neither agree or disagree	Neither agree or disagree	Rather disagree	Rather agree	Rather agree	Rather agree	Rather agree	Rather agree	Rather agree	Rather agree	Rather agree	Rather agree	Neither agree or disagree	Rather agree	Rather agree	Neither agree or disagree	Neither agree or disagree	Rather disagree	Rather disagree	Rather disagree	Rather disagree	Rather agree	Rather agree	Rather agree	Agree	Rather agree	Agree	Agree	Rather disagree	Rather disagree	Agree	Agree	Disagree	Rather agree	Neither agree or disagree	Agree	Rather disagree	Agree	Rather agree	Agree	Rather agree	Rather disagree	Rather agree	Rather disagree	Rather agree	Rather agree	Agree	Strongly agree
2018-11-07 18:07:10	Rather disagree	Disagree	Neither agree or disagree	Rather agree	Rather agree	Rather agree	Disagree	Strongly disagree	Neither agree or disagree	Strongly disagree	Neither agree or disagree	Neither agree or disagree	Neither agree or disagree	Disagree	Disagree	Neither agree or disagree	Strongly disagree	Strongly disagree	Strongly disagree	Disagree	Disagree	Disagree	Disagree	Rather disagree	Neither agree or disagree	Rather agree	Rather agree	Rather agree	Rather agree	Rather disagree	Rather agree	Rather agree	Neither agree or disagree	Strongly disagree	Rather agree	Rather disagree	Rather agree	Neither agree or disagree	Rather agree	Rather agree	Rather agree	Rather agree	Rather agree	Neither agree or disagree	Rather disagree	Rather disagree	Rather agree	Rather agree	Rather agree
2018-11-07 19:46:04	Neither agree or disagree	Neither agree or disagree	Neither agree or disagree	Neither agree or disagree	Rather agree	Neither agree or disagree	Rather agree	Rather disagree	Rather disagree	Strongly disagree	Strongly disagree	Disagree	Disagree	Disagree	Disagree	Disagree	Disagree	Disagree	Disagree	Disagree	Disagree	Disagree	Disagree	Disagree	Disagree	Neither agree or disagree	Neither agree or disagree	Rather agree	Rather agree	Rather disagree	Rather disagree	Neither agree or disagree	Rather agree	Rather disagree	Rather agree	Rather disagree	Neither agree or disagree	Rather disagree	Rather agree	Neither agree or disagree	Rather agree	Rather agree	Rather disagree	Neither agree or disagree	Neither agree or disagree	Rather disagree	Rather agree	Rather disagree	Neither agree or disagree
2018-11-07 19:47:36	Rather disagree	Neither agree or disagree	Rather disagree	Rather agree	Rather disagree	Rather disagree	Rather disagree	Disagree	Strongly disagree	Strongly disagree	Disagree	Disagree	Disagree	Strongly disagree	Strongly disagree	Rather disagree	Strongly disagree	Strongly disagree	Strongly disagree	Strongly disagree	Strongly disagree	Strongly disagree	Strongly disagree	Strongly disagree	Strongly disagree	Neither agree or disagree	Strongly disagree	Rather agree	Rather agree	Rather disagree	Rather disagree	Rather agree	Rather disagree	Strongly disagree	Agree	Neither agree or disagree	Rather agree	Rather disagree	Agree	Rather disagree	Rather agree	Rather agree	Rather agree	Rather disagree	Rather disagree	Rather disagree	Agree	Rather disagree	Agree
2018-11-07 20:00:35	Strongly disagree	Neither agree or disagree	Rather disagree	Rather agree	Neither agree or disagree	Rather agree	Rather disagree	Rather disagree	Rather disagree	Strongly disagree	Disagree	Rather disagree	Disagree	Strongly disagree	Rather disagree	Rather disagree	Strongly disagree	Rather disagree	Strongly disagree	Strongly disagree	Strongly disagree	Rather disagree	Rather disagree	Neither agree or disagree	Neither agree or disagree	Rather agree	Rather disagree	Strongly agree	Rather agree	Rather disagree	Rather disagree	Agree	Rather disagree	Strongly disagree	Rather agree	Rather agree	Rather agree	Rather agree	Rather agree	Rather agree	Rather agree	Rather disagree	Rather disagree	Rather agree	Neither agree or disagree	Rather agree	Rather agree	Rather agree	Rather agree
2018-11-07 20:30:37	Strongly disagree	Neither agree or disagree	Disagree	Rather agree	Strongly disagree	Rather agree	Rather disagree	Strongly disagree	Rather agree	Strongly disagree	Disagree	Disagree	Strongly disagree	Strongly disagree	Strongly disagree	Strongly disagree	Strongly disagree	Strongly disagree	Strongly disagree	Strongly disagree	Strongly disagree	Strongly disagree	Strongly disagree	Strongly disagree	Strongly disagree	Strongly agree	Disagree	Agree	Strongly agree	Agree	Strongly disagree	Agree	Rather agree	Strongly disagree	Strongly agree	Rather agree	Agree	Rather disagree	Strongly agree	Disagree	Agree	Agree	Strongly disagree	Strongly disagree	Strongly disagree	Rather disagree	Agree	Rather agree	Agree
2018-11-07 20:46:34	Rather agree	Rather disagree	Neither agree or disagree	Agree	Strongly agree	Strongly agree	Rather agree	Strongly disagree	Strongly disagree	Disagree	Neither agree or disagree	Neither agree or disagree	Strongly disagree	Neither agree or disagree	Rather agree	Agree	Strongly disagree	Strongly disagree	Strongly disagree	Strongly disagree	Strongly disagree	Strongly disagree	Rather agree	Rather agree	Agree	Strongly agree	Disagree	Strongly agree	Strongly agree	Rather agree	Rather agree	Agree	Agree	Disagree	Agree	Rather agree	Strongly agree	Rather agree	Agree	Rather agree	Strongly agree	Rather agree	Rather disagree	Strongly disagree	Strongly disagree	Rather disagree	Strongly agree	Disagree	Strongly agree
2018-11-07 21:16:57	Neither agree or disagree	Neither agree or disagree	Neither agree or disagree	Rather agree	Rather agree	Rather agree	Neither agree or disagree	Rather disagree	Disagree	Strongly disagree	Neither agree or disagree	Neither agree or disagree	Rather disagree	Rather disagree	Rather disagree	Rather disagree	Rather disagree	Rather disagree	Neither agree or disagree	Neither agree or disagree	Neither agree or disagree	Neither agree or disagree	Neither agree or disagree	Neither agree or disagree	Neither agree or disagree	Rather agree	Neither agree or disagree	Neither agree or disagree	Rather disagree	Neither agree or disagree	Rather disagree	Neither agree or disagree	Neither agree or disagree	Strongly disagree	Neither agree or disagree	Neither agree or disagree	Neither agree or disagree	Rather agree	Rather agree	Rather agree	Neither agree or disagree	Rather agree	Rather disagree	Rather disagree	Rather disagree	Rather disagree	Neither agree or disagree	Disagree	Rather agree
2018-11-07 22:45:45	Neither agree or disagree	Rather agree	Neither agree or disagree	Rather disagree	Agree	Strongly agree	Strongly agree	Rather disagree	Rather agree	Rather disagree	Rather disagree	Rather agree	Neither agree or disagree	Rather disagree	Agree	Rather agree	Agree	Agree	Disagree	Rather disagree	Rather disagree	Rather disagree	Neither agree or disagree	Neither agree or disagree	Neither agree or disagree	Neither agree or disagree	Rather agree	Rather agree	Rather agree	Rather agree	Rather agree	Rather agree	Rather agree	Rather disagree	Rather agree	Rather agree	Rather agree	Rather agree	Agree	Rather agree	Rather agree	Neither agree or disagree	Rather agree	Agree	Strongly disagree	Agree	Agree	Agree	Strongly agree
2018-11-07 22:52:05	Rather disagree	Strongly agree	Strongly agree	Strongly agree	Strongly agree	Strongly agree	Rather agree	Rather disagree	Rather disagree	Rather agree	Rather disagree	Rather agree	Rather agree	Strongly disagree	Rather agree	Neither agree or disagree	Strongly disagree	Strongly disagree	Strongly disagree	Strongly disagree	Strongly disagree	Strongly disagree	Strongly disagree	Strongly disagree	Strongly disagree	Rather agree	Rather agree	Rather agree	Rather agree	Strongly disagree	Rather agree	Rather agree	Strongly agree	Disagree	Rather disagree	Rather agree	Rather agree	Strongly disagree	Rather agree	Strongly agree	Rather agree	Neither agree or disagree	Neither agree or disagree	Rather agree	Strongly disagree	Strongly agree	Rather agree	Strongly agree	Strongly agree
2018-11-08 13:46:56	Strongly disagree	Strongly disagree	Strongly disagree	Rather agree	Rather agree	Rather agree	Strongly disagree	Strongly disagree	Strongly disagree	Strongly disagree	Neither agree or disagree	Neither agree or disagree	Neither agree or disagree	Neither agree or disagree	Neither agree or disagree	Neither agree or disagree	Neither agree or disagree	Neither agree or disagree	Neither agree or disagree	Neither agree or disagree	Neither agree or disagree	Neither agree or disagree	Neither agree or disagree	Neither agree or disagree	Neither agree or disagree	Agree	Strongly disagree	Agree	Agree	Strongly disagree	Strongly disagree	Rather agree	Strongly disagree	Strongly disagree	Strongly disagree	Strongly disagree	Strongly disagree	Strongly disagree	Rather agree	Strongly disagree	Rather agree	Rather agree	Strongly disagree	Strongly disagree	Strongly disagree	Strongly disagree	Rather agree	Strongly disagree	Strongly agree
2018-11-08 14:22:37	Disagree	Rather agree	Rather agree	Rather agree	Rather agree	Rather agree	Rather agree	Strongly disagree	Strongly disagree	Disagree	Rather agree	Rather agree	Rather agree	Disagree	Disagree	Disagree	Disagree	Disagree	Rather disagree	Disagree	Disagree	Disagree	Disagree	Disagree	Disagree	Rather agree	Disagree	Agree	Strongly agree	Strongly disagree	Disagree	Agree	Disagree	Strongly disagree	Rather agree	Strongly disagree	Rather agree	Strongly disagree	Agree	Strongly disagree	Rather agree	Rather agree	Strongly disagree	Strongly disagree	Strongly disagree	Strongly disagree	Rather agree	Strongly disagree	Rather agree
2018-11-08 19:23:02	Agree	Disagree	Neither agree or disagree	Strongly disagree	Strongly agree	Agree	Strongly agree	Rather disagree	Rather disagree	Neither agree or disagree	Rather agree	Agree	Strongly agree	Strongly agree	Agree	Rather disagree	Neither agree or disagree	Agree	Rather disagree	Rather agree	Disagree	Neither agree or disagree	Rather disagree	Rather agree	Neither agree or disagree	Neither agree or disagree	Rather agree	Agree	Strongly agree	Disagree	Strongly disagree	Strongly agree	Strongly agree	Rather agree	Agree	Neither agree or disagree	Agree	Neither agree or disagree	Agree	Strongly disagree	Disagree	Rather agree	Rather disagree	Neither agree or disagree	Rather agree	Rather disagree	Neither agree or disagree	Rather agree	Agree
2018-11-08 20:36:39	Rather disagree	Rather disagree	Rather disagree	Rather disagree	Neither agree or disagree	Rather agree	Neither agree or disagree	Strongly disagree	Rather disagree	Strongly disagree	Neither agree or disagree	Disagree	Neither agree or disagree	Neither agree or disagree	Neither agree or disagree	Neither agree or disagree	Strongly disagree	Strongly disagree	Strongly disagree	Neither agree or disagree	Neither agree or disagree	Rather agree	Rather disagree	Neither agree or disagree	Neither agree or disagree	Rather agree	Rather disagree	Rather agree	Rather agree	Rather disagree	Rather disagree	Rather agree	Rather disagree	Strongly disagree	Rather agree	Neither agree or disagree	Rather agree	Rather disagree	Rather agree	Rather disagree	Rather agree	Rather agree	Rather disagree	Rather disagree	Rather disagree	Rather disagree	Rather agree	Rather disagree	Rather agree
2018-11-08 22:19:12	Strongly agree	Strongly agree	Strongly agree	Strongly agree	Agree	Rather agree	Rather agree	Neither agree or disagree	Neither agree or disagree	Neither agree or disagree	Strongly agree	Strongly agree	Neither agree or disagree	Neither agree or disagree	Neither agree or disagree	Neither agree or disagree	Neither agree or disagree	Neither agree or disagree	Neither agree or disagree	Neither agree or disagree	Neither agree or disagree	Neither agree or disagree	Neither agree or disagree	Neither agree or disagree	Neither agree or disagree	Strongly agree	Strongly disagree	Strongly agree	Strongly agree	Rather disagree	Strongly disagree	Neither agree or disagree	Strongly agree	Strongly disagree	Strongly agree	Strongly disagree	Strongly disagree	Strongly disagree	Agree	Strongly disagree	Strongly agree	Neither agree or disagree	Strongly disagree	Strongly disagree	Strongly disagree	Strongly disagree	Agree	Strongly disagree	Agree
2018-11-09 05:52:43	Rather disagree	Disagree	Disagree	Disagree	Rather agree	Rather agree	Rather disagree	Strongly disagree	Strongly disagree	Strongly disagree	Strongly disagree	Strongly disagree	Strongly disagree	Strongly disagree	Strongly disagree	Rather disagree	Strongly disagree	Strongly disagree	Strongly disagree	Strongly disagree	Strongly disagree	Strongly disagree	Strongly disagree	Strongly disagree	Strongly disagree	Rather agree	Rather agree	Agree	Agree	Disagree	Rather agree	Agree	Strongly agree	Rather disagree	Rather agree	Rather agree	Rather agree	Rather disagree	Rather agree	Rather agree	Neither agree or disagree	Rather disagree	Strongly disagree	Rather disagree	Strongly disagree	Rather disagree	Strongly agree	Rather disagree	Rather agree
2018-11-09 07:07:24	Strongly disagree	Strongly disagree	Strongly disagree	Strongly disagree	Strongly disagree	Strongly disagree	Strongly disagree	Strongly disagree	Strongly disagree	Strongly disagree	Strongly disagree	Strongly disagree	Strongly disagree	Strongly disagree	Strongly disagree	Strongly disagree	Strongly disagree	Strongly disagree	Strongly disagree	Strongly disagree	Strongly disagree	Strongly disagree	Strongly disagree	Strongly disagree	Strongly disagree	Strongly agree	Disagree	Strongly agree	Strongly agree	Strongly disagree	Strongly disagree	Strongly agree	Strongly disagree	Strongly disagree	Strongly agree	Strongly disagree	Strongly agree	Strongly disagree	Strongly agree	Strongly disagree	Strongly agree	Agree	Disagree	Strongly disagree	Strongly disagree	Strongly disagree	Strongly agree	Strongly disagree	Agree
2018-11-09 20:54:20	Strongly disagree	Disagree	Neither agree or disagree	Rather disagree	Rather agree	Rather agree	Strongly disagree	Strongly disagree	Rather disagree	Strongly disagree	Strongly disagree	Strongly disagree	Neither agree or disagree	Neither agree or disagree	Neither agree or disagree	Neither agree or disagree	Neither agree or disagree	Neither agree or disagree	Rather disagree	Neither agree or disagree	Neither agree or disagree	Neither agree or disagree	Neither agree or disagree	Neither agree or disagree	Neither agree or disagree	Rather agree	Rather agree	Agree	Strongly agree	Rather agree	Rather disagree	Strongly agree	Strongly disagree	Strongly disagree	Rather agree	Agree	Agree	Rather disagree	Strongly agree	Strongly agree	Rather agree	Rather agree	Strongly disagree	Strongly disagree	Strongly disagree	Strongly disagree	Strongly agree	Strongly agree	Strongly agree
2018-11-09 21:05:12	Rather agree	Agree	Agree	Rather agree	Agree	Strongly agree	Agree	Rather agree	Rather agree	Rather agree	Agree	Rather agree	Rather agree	Agree	Neither agree or disagree	Rather agree	Neither agree or disagree	Neither agree or disagree	Rather disagree	Rather agree	Rather agree	Rather agree	Neither agree or disagree	Rather disagree	Rather agree	Rather agree	Rather disagree	Agree	Rather agree	Agree	Rather agree	Rather agree	Rather agree	Neither agree or disagree	Rather agree	Rather agree	Neither agree or disagree	Neither agree or disagree	Agree	Rather disagree	Agree	Agree	Agree	Rather agree	Rather disagree	Rather disagree	Rather agree	Rather agree	Strongly agree
2018-11-09 21:05:47	Neither agree or disagree	Disagree	Strongly disagree	Rather disagree	Rather agree	Rather agree	Disagree	Rather disagree	Disagree	Rather disagree	Strongly disagree	Strongly disagree	Strongly disagree	Strongly disagree	Strongly disagree	Strongly disagree	Disagree	Disagree	Disagree	Strongly disagree	Strongly disagree	Strongly disagree	Strongly disagree	Strongly disagree	Strongly disagree	Strongly agree	Disagree	Strongly agree	Strongly agree	Strongly disagree	Disagree	Strongly agree	Rather disagree	Strongly disagree	Agree	Rather disagree	Rather agree	Rather disagree	Agree	Disagree	Agree	Rather agree	Rather disagree	Disagree	Strongly disagree	Rather disagree	Strongly agree	Disagree	Agree
2018-11-09 21:08:54	Rather disagree	Neither agree or disagree	Disagree	Disagree	Disagree	Disagree	Disagree	Disagree	Disagree	Neither agree or disagree	Rather disagree	Rather disagree	Rather agree	Rather disagree	Rather agree	Rather agree	Rather agree	Disagree	Rather disagree	Rather disagree	Rather disagree	Neither agree or disagree	Rather disagree	Neither agree or disagree	Neither agree or disagree	Neither agree or disagree	Rather disagree	Rather agree	Neither agree or disagree	Neither agree or disagree	Neither agree or disagree	Rather agree	Neither agree or disagree	Neither agree or disagree	Rather disagree	Rather disagree	Rather disagree	Neither agree or disagree	Rather disagree	Neither agree or disagree	Neither agree or disagree	Neither agree or disagree	Rather disagree	Neither agree or disagree	Disagree	Rather agree	Rather disagree	Rather disagree	Disagree
2018-11-09 21:15:26	Neither agree or disagree	Rather disagree	Neither agree or disagree	Rather agree	Rather agree	Neither agree or disagree	Neither agree or disagree	Neither agree or disagree	Neither agree or disagree	Neither agree or disagree	Neither agree or disagree	Neither agree or disagree	Neither agree or disagree	Neither agree or disagree	Neither agree or disagree	Neither agree or disagree	Neither agree or disagree	Neither agree or disagree	Neither agree or disagree	Neither agree or disagree	Neither agree or disagree	Neither agree or disagree	Neither agree or disagree	Neither agree or disagree	Neither agree or disagree	Rather agree	Neither agree or disagree	Neither agree or disagree	Neither agree or disagree	Neither agree or disagree	Neither agree or disagree	Neither agree or disagree	Neither agree or disagree	Neither agree or disagree	Neither agree or disagree	Neither agree or disagree	Neither agree or disagree	Neither agree or disagree	Neither agree or disagree	Neither agree or disagree	Neither agree or disagree	Neither agree or disagree	Rather disagree	Neither agree or disagree	Neither agree or disagree	Neither agree or disagree	Neither agree or disagree	Neither agree or disagree	Neither agree or disagree
2018-11-09 21:15:50	Neither agree or disagree	Rather agree	Rather agree	Rather disagree	Rather agree	Neither agree or disagree	Rather disagree	Rather agree	Rather agree	Rather disagree	Rather disagree	Neither agree or disagree	Rather disagree	Neither agree or disagree	Neither agree or disagree	Rather agree	Neither agree or disagree	Strongly disagree	Strongly disagree	Rather disagree	Rather disagree	Rather disagree	Agree	Neither agree or disagree	Rather disagree	Agree	Strongly disagree	Strongly agree	Strongly agree	Strongly disagree	Disagree	Strongly agree	Rather agree	Strongly disagree	Agree	Disagree	Strongly disagree	Disagree	Agree	Disagree	Agree	Agree	Strongly disagree	Disagree	Strongly disagree	Disagree	Strongly agree	Disagree	Strongly agree
2018-11-09 21:19:09	Neither agree or disagree	Neither agree or disagree	Strongly disagree	Rather agree	Rather disagree	Rather agree	Strongly disagree	Strongly disagree	Strongly disagree	Strongly disagree	Rather disagree	Neither agree or disagree	Disagree	Neither agree or disagree	Neither agree or disagree	Neither agree or disagree	Neither agree or disagree	Neither agree or disagree	Neither agree or disagree	Neither agree or disagree	Neither agree or disagree	Neither agree or disagree	Neither agree or disagree	Neither agree or disagree	Neither agree or disagree	Strongly agree	Strongly disagree	Strongly agree	Agree	Strongly disagree	Strongly disagree	Strongly agree	Rather disagree	Strongly disagree	Strongly agree	Disagree	Agree	Disagree	Agree	Disagree	Agree	Agree	Rather disagree	Disagree	Disagree	Disagree	Strongly agree	Strongly disagree	Rather agree
2018-11-09 21:19:55	Disagree	Rather agree	Rather agree	Rather agree	Agree	Strongly agree	Rather agree	Rather disagree	Rather agree	Agree	Rather agree	Agree	Rather agree	Rather agree	Rather agree	Agree	Rather disagree	Rather disagree	Rather disagree	Rather disagree	Disagree	Rather disagree	Rather agree	Rather agree	Rather agree	Agree	Rather disagree	Agree	Agree	Disagree	Disagree	Strongly agree	Strongly disagree	Strongly disagree	Strongly agree	Rather disagree	Agree	Rather disagree	Rather agree	Rather disagree	Agree	Rather agree	Disagree	Disagree	Strongly disagree	Rather disagree	Rather agree	Disagree	Neither agree or disagree
2018-11-09 21:20:41	Disagree	Strongly disagree	Strongly disagree	Strongly disagree	Neither agree or disagree	Rather agree	Disagree	Strongly disagree	Strongly disagree	Strongly disagree	Strongly disagree	Disagree	Disagree	Neither agree or disagree	Neither agree or disagree	Neither agree or disagree	Neither agree or disagree	Rather agree	Strongly disagree	Strongly disagree	Neither agree or disagree	Neither agree or disagree	Strongly disagree	Neither agree or disagree	Neither agree or disagree	Rather disagree	Strongly disagree	Rather agree	Rather agree	Agree	Strongly agree	Rather disagree	Agree	Rather agree	Neither agree or disagree	Strongly agree	Rather disagree	Rather agree	Rather disagree	Strongly agree	Rather agree	Disagree	Strongly disagree	Neither agree or disagree	Disagree	Strongly agree	Rather disagree	Rather agree	Strongly agree
2018-11-09 21:23:58	Strongly disagree	Strongly disagree	Disagree	Disagree	Rather agree	Rather agree	Rather agree	Rather agree	Rather agree	Rather disagree	Rather agree	Rather agree	Neither agree or disagree	Disagree	Agree	Rather agree	Rather agree	Rather agree	Rather disagree	Rather disagree	Rather disagree	Disagree	Agree	Agree	Rather agree	Rather agree	Rather agree	Rather agree	Agree	Rather disagree	Rather agree	Disagree	Rather agree	Rather disagree	Rather agree	Agree	Rather agree	Rather agree	Disagree	Rather agree	Rather agree	Rather agree	Rather disagree	Rather disagree	Rather disagree	Neither agree or disagree	Neither agree or disagree	Neither agree or disagree	Rather agree
2018-11-09 21:27:12	Strongly disagree	Strongly disagree	Disagree	Disagree	Rather disagree	Rather agree	Disagree	Strongly disagree	Strongly disagree	Strongly disagree	Strongly disagree	Rather disagree	Strongly disagree	Strongly disagree	Strongly disagree	Strongly disagree	Strongly disagree	Strongly disagree	Strongly disagree	Strongly disagree	Strongly disagree	Strongly disagree	Strongly disagree	Strongly disagree	Strongly disagree	Rather agree	Rather disagree	Rather agree	Strongly agree	Disagree	Rather disagree	Strongly agree	Disagree	Strongly disagree	Strongly agree	Neither agree or disagree	Rather agree	Rather disagree	Rather agree	Rather agree	Rather agree	Rather agree	Disagree	Rather disagree	Strongly disagree	Disagree	Rather agree	Rather agree	Rather agree
2018-11-09 21:40:07	Strongly disagree	Strongly disagree	Strongly disagree	Strongly disagree	Neither agree or disagree	Rather disagree	Disagree	Strongly disagree	Strongly disagree	Strongly disagree	Strongly disagree	Strongly disagree	Strongly disagree	Strongly disagree	Strongly disagree	Strongly disagree	Strongly disagree	Strongly disagree	Strongly disagree	Strongly disagree	Strongly disagree	Strongly disagree	Strongly disagree	Strongly disagree	Strongly disagree	Rather disagree	Agree	Neither agree or disagree	Neither agree or disagree	Agree	Rather agree	Rather disagree	Disagree	Rather agree	Neither agree or disagree	Rather agree	Agree	Neither agree or disagree	Rather agree	Rather agree	Rather disagree	Neither agree or disagree	Rather agree	Rather agree	Rather agree	Rather agree	Disagree	Strongly disagree	Agree
2018-11-10 10:37:36	Strongly disagree	Rather disagree	Rather disagree	Rather agree	Rather agree	Agree	Rather agree	Rather disagree	Rather agree	Rather agree	Rather disagree	Rather disagree	Disagree	Rather disagree	Rather disagree	Rather disagree	Rather disagree	Rather disagree	Rather disagree	Rather disagree	Rather disagree	Rather disagree	Rather disagree	Rather disagree	Rather disagree	Strongly agree	Strongly disagree	Agree	Rather agree	Strongly disagree	Disagree	Rather agree	Disagree	Strongly disagree	Strongly agree	Rather disagree	Agree	Disagree	Strongly agree	Disagree	Strongly agree	Strongly agree	Rather agree	Strongly disagree	Strongly disagree	Strongly disagree	Strongly agree	Rather agree	Strongly agree
[truncated: 472 more rows]
[truncated: 6 more columns]
